# Supplementary material for: Resource Utilization of Patients with Parkinson’s Disease in the Late Stages of the Disease in Germany: Data from the CLaSP Study
Source: Springer Nature journal article supplement (doi:10.1007/s40273-021-01011-y), 2021-03-19
Supplement: MOESM5 [file 24131306]

# Versorgungssituation von Parkinson-Patienten in fortgeschrittenem Krankheitsstadium\*

## Fragebogen für den untersuchenden Arzt

Philipps

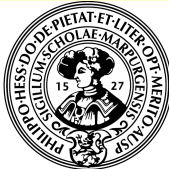

Universität  
Marburg

Patienten ID:

|                      |                      |                      |                      |                      |                      |
|----------------------|----------------------|----------------------|----------------------|----------------------|----------------------|
| <input type="text"/> |
|----------------------|----------------------|----------------------|----------------------|----------------------|----------------------|

Datum der Visite:

|                      |                      |                      |                      |                      |                      |                      |                      |
|----------------------|----------------------|----------------------|----------------------|----------------------|----------------------|----------------------|----------------------|
| <input type="text"/> |
| T                    | T                    | M                    | M                    | J                    | J                    | J                    | J                    |

(\* dieses Projekt wird unterstützt durch das European Joint Program – Neurodegenerative Disease Research)

**DIESES DECKBLATT IST AUSSCHLIESSLICH ZUM  
VERBLEIB IM BEHANDELNDEN ZENTRUM BESTIMMT**



Patienten ID

**Versorgungssituation bei Parkinson-Patienten in  
fortgeschrittenem Krankheitsstadium\***

**Fragebogen für den untersuchenden Arzt**

Philipps

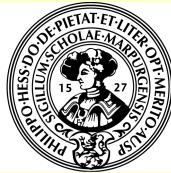

Universität  
Marburg

(\* dieses Projekt wird unterstützt durch das European Joint Program – Neurodegenerative Disease Research)

# 1 Checkliste klinischer Symptome

| <b>A) Motorische Komplikationen</b> | <b>Ja</b>                | <b>Nein</b>              |
|-------------------------------------|--------------------------|--------------------------|
| Motorische Fluktuationen            | <input type="checkbox"/> | <input type="checkbox"/> |
| On-Off-Phänomen                     | <input type="checkbox"/> | <input type="checkbox"/> |
| „Wearing Off“                       | <input type="checkbox"/> | <input type="checkbox"/> |
| Dystonie                            | <input type="checkbox"/> | <input type="checkbox"/> |
| Unvorhersagbare Off-Phasen          | <input type="checkbox"/> | <input type="checkbox"/> |
| Dyskinesie                          | <input type="checkbox"/> | <input type="checkbox"/> |

| <b>B) Axiale Symptome</b>             | <b>Ja</b>                | <b>Nein</b>              |
|---------------------------------------|--------------------------|--------------------------|
| Stürze / posturale Instabilität       | <input type="checkbox"/> | <input type="checkbox"/> |
| „Freezing“                            | <input type="checkbox"/> | <input type="checkbox"/> |
| Camptocormie / gestörte Körperhaltung | <input type="checkbox"/> | <input type="checkbox"/> |
| Dysarthrie                            | <input type="checkbox"/> | <input type="checkbox"/> |
| Schluckstörungen                      | <input type="checkbox"/> | <input type="checkbox"/> |

| <b>C) Autonome Funktionsstörungen</b> | <b>Ja</b>                | <b>Nein</b>              |
|---------------------------------------|--------------------------|--------------------------|
| Gastrointestinal                      | <input type="checkbox"/> | <input type="checkbox"/> |
| Urogenital                            | <input type="checkbox"/> | <input type="checkbox"/> |
| Kardiovaskulär                        | <input type="checkbox"/> | <input type="checkbox"/> |

| <b>D) Schmerzen (im Zusammenhang mit der Parkinson-Erkrankung)</b> | <b>Ja</b>                | <b>Nein</b>              |
|--------------------------------------------------------------------|--------------------------|--------------------------|
| Nozizeptiv                                                         | <input type="checkbox"/> | <input type="checkbox"/> |
| Neuropathisch                                                      | <input type="checkbox"/> | <input type="checkbox"/> |

| <b>E) Schlafstörungen</b>                | <b>Ja</b>                | <b>Nein</b>              |
|------------------------------------------|--------------------------|--------------------------|
| Exzessive Tagesschläfrigkeit             | <input type="checkbox"/> | <input type="checkbox"/> |
| Schlaflosigkeit                          | <input type="checkbox"/> | <input type="checkbox"/> |
| REM-Schlaf-Verhaltensstörung             | <input type="checkbox"/> | <input type="checkbox"/> |
| Restless-Legs-Syndrom                    | <input type="checkbox"/> | <input type="checkbox"/> |
| Periodic Limb Movement Disorder Symptoms | <input type="checkbox"/> | <input type="checkbox"/> |
| Schlafapnoe                              | <input type="checkbox"/> | <input type="checkbox"/> |

| <b>F) Kognitive Beeinträchtigung</b> | <b>Ja</b>                | <b>Nein</b>              |
|--------------------------------------|--------------------------|--------------------------|
| Apathie                              | <input type="checkbox"/> | <input type="checkbox"/> |
| Demenz                               | <input type="checkbox"/> | <input type="checkbox"/> |

| <b>G) Psychiatrische Symptome</b> | <b>Ja</b>                | <b>Nein</b>              |
|-----------------------------------|--------------------------|--------------------------|
| Depression                        | <input type="checkbox"/> | <input type="checkbox"/> |
| Angst                             | <input type="checkbox"/> | <input type="checkbox"/> |
| Psychose                          | <input type="checkbox"/> | <input type="checkbox"/> |
| Halluzinationen                   | <input type="checkbox"/> | <input type="checkbox"/> |

| <b>H) Impulskontrollstörungen</b> | <b>Ja</b>                | <b>Nein</b>              |
|-----------------------------------|--------------------------|--------------------------|
| Spielsucht                        | <input type="checkbox"/> | <input type="checkbox"/> |
| Kaufsucht                         | <input type="checkbox"/> | <input type="checkbox"/> |
| Hypersexualität                   | <input type="checkbox"/> | <input type="checkbox"/> |
| Binge-Eating                      | <input type="checkbox"/> | <input type="checkbox"/> |
| Stereotypes Verhalten             | <input type="checkbox"/> | <input type="checkbox"/> |

## 2 Klinischer Gesamteindruck

### Schweregrad der Erkrankung

*Ziehen Sie Ihren gesamten Erfahrungsschatz an dieser Art von Kranken in Betracht und geben Sie an, wie hoch Sie den jetzigen Grad der Erkrankung des Probanden / Patienten für den Zeitraum der letzten Woche einschätzen.*

- Nicht beurteilbar (0).
- Proband / Patient ist überhaupt nicht krank (1).
- Proband / Patient ist grenzwertig krank (2).
- Proband / Patient ist nur leicht krank (3).
- Proband / Patient ist mäßig krank (4).
- Proband / Patient ist deutlich krank (5).
- Proband / Patient ist schwer krank (6).
- Proband / Patient gehört zu den extrem schwer Kranken (7).

### Gesamtbeurteilung der Zustandsänderung

*Beurteilen Sie dabei die Zustandsänderung insgesamt, also nicht nur das Ergebnis der Medikamentenbehandlung. Bitte vergleichen Sie den jetzigen Zustand des Probanden / Patienten mit dem beim letzten Kontakt mit Ihnen, und geben Sie an, inwieweit sich das Krankheitsbild des Probanden / Patienten geändert hat.*

- Nicht beurteilbar (0).
- Zustand ist viel besser (1).
- Zustand ist etwas besser (2).
- Zustand ist nur wenig besser (3).
- Zustand ist unverändert (4).
- Zustand ist geringfügig schlechter (5).
- Zustand ist viel schlechter (6).
- Zustand ist sehr viel schlechter (7).

### **3 Hoehn & Yahr Stadium**

**0** = Kein Anzeichen der Erkrankung

---

**1** = unilaterale Erkrankung

---

**2** = bilaterale Erkrankung, keine Beeinträchtigung der posturalen Reflexe

---

**3** = Milde bis moderate, bilaterale Erkrankung; Beeinträchtigung der posturalen Reflexe; unabhängig

---

**4** = schwere Beeinträchtigung; noch fähig, ohne Hilfe zu gehen und zu stehen

---

**5** = ohne Hilfe an Rollstuhl oder Bett gebunden

## 4 Unified Parkinson's Disease Rating Scale - UPDRS

War der Patient zum Zeitpunkt der Untersuchung im ON- oder im OFF-Stadium?

ON     OFF

### I. Kognitive Funktionen, Verhalten und Stimmung

|                             |           |                                                                                                                                                                                                                                                   |
|-----------------------------|-----------|---------------------------------------------------------------------------------------------------------------------------------------------------------------------------------------------------------------------------------------------------|
|                             | <b>1.</b> | <b>Intellektuelle Einschränkung</b>                                                                                                                                                                                                               |
| 0                           | =         | Nicht vorhanden.                                                                                                                                                                                                                                  |
| 1                           | =         | Leicht. Vergesslichkeit, Ereignisse werden teilweise erinnert; keine anderweitigen Schwierigkeiten.                                                                                                                                               |
| 2                           | =         | Mäßige Gedächtnisstörungen mit Desorientiertheit und mäßigen Schwierigkeiten beim Meistern komplexer Probleme. Leichte, aber definitive Beeinträchtigung bei der Erledigung häuslicher Aufgaben mit der Notwendigkeit einer gelegentlichen Hilfe. |
| 3                           | =         | Schwere Gedächtnisstörungen mit zeitlicher und häufig auch örtlicher Desorientiertheit. Schwere Einschränkung bei der Bewältigung von Problemen.                                                                                                  |
| 4                           | =         | Schwere Gedächtnisstörungen, Orientierung nur zur Person erhalten. Kann keine Urteile fällen und keine Probleme lösen. Benötigt bei der persönlichen Pflege viel Hilfe. Kann überhaupt nicht mehr alleine gelassen werden.                        |
|                             |           |                                                                                                                                                                                                                                                   |
|                             | <b>2.</b> | <b>Denkstörungen</b><br><i>(als Folge von Demenz oder Medikamenten-Intoxikationen)</i>                                                                                                                                                            |
| 0                           | =         | Nicht vorhanden.                                                                                                                                                                                                                                  |
| 1                           | =         | Lebhafte Träume.                                                                                                                                                                                                                                  |
| 2                           | =         | „Gutartige“ Halluzinationen mit erhaltener Einsicht.                                                                                                                                                                                              |
| 3                           | =         | Gelegentliche bis häufige Halluzinationen oder Wahnvorstellungen; keine Einsicht; könnte sich störend auf die täglichen Aktivitäten auswirken.                                                                                                    |
| 4                           | =         | Persistierende Halluzinationen. Wahnvorstellungen oder floride Psychose. Kann sich nicht selbst versorgen.                                                                                                                                        |
|                             |           |                                                                                                                                                                                                                                                   |
|                             | <b>3.</b> | <b>Depression</b>                                                                                                                                                                                                                                 |
| 0                           | =         | Nicht vorhanden.                                                                                                                                                                                                                                  |
| 1                           | =         | Zeitweise Traurigkeit oder Schuldgefühl stärker als normal; niemals Tage oder Wochen anhaltend.                                                                                                                                                   |
| 2                           | =         | Anhaltende Depression (1 Woche oder länger).                                                                                                                                                                                                      |
| 3                           | =         | Anhaltende Depression mit vegetativen Symptomen (Schlaflosigkeit, Appetitlosigkeit, Gewichtsabnahme, Interessensverlust).                                                                                                                         |
| 4                           | =         | Anhaltende Depression mit vegetativen Symptomen und Selbstmordgedanken oder -absichten,                                                                                                                                                           |
|                             |           |                                                                                                                                                                                                                                                   |
|                             | <b>4.</b> | <b>Motivation/Initiative</b>                                                                                                                                                                                                                      |
| 0                           | =         | Normal.                                                                                                                                                                                                                                           |
| 1                           | =         | Weniger energisch als sonst; passiver.                                                                                                                                                                                                            |
| 2                           | =         | Fehlende Initiative oder Desinteresse an nicht Routinemäßigen Aktivitäten                                                                                                                                                                         |
| 3                           | =         | Fehlende Initiative oder Desinteresse an täglichen (routinemäßigen) Aktivitäten.                                                                                                                                                                  |
| 4                           | =         | In sich gekehrt, völliges Fehlen von Motivation.                                                                                                                                                                                                  |
| <b>SUMME UPDRS I: _____</b> |           |                                                                                                                                                                                                                                                   |

## II. Aktivitäten des täglichen Lebens

|   |            |                                                                                              |
|---|------------|----------------------------------------------------------------------------------------------|
|   |            |                                                                                              |
|   | <b>5.</b>  | <b>Sprache</b>                                                                               |
| 0 | =          | Normal.                                                                                      |
| 1 | =          | Leicht beeinträchtigt, ohne Schwierigkeiten verständlich.                                    |
| 2 | =          | Mäßig beeinträchtigt. Wird bisweilen gebeten, etwas zu wiederholen.                          |
| 3 | =          | Stark beeinträchtigt. Wird häufig gebeten, etwas zu wiederholen.                             |
| 4 | =          | Meistens unverständlich.                                                                     |
|   |            |                                                                                              |
|   | <b>6.</b>  | <b>Speichelsekretion</b>                                                                     |
| 0 | =          | Normal.                                                                                      |
| 1 | =          | Gering, aber eindeutig vermehrter Speichel im Mund; nachts gelegentlich Speichelaustritt     |
| 2 | =          | Mäßig vermehrter Speichel; eventuell minimaler Speichelaustritt.                             |
| 3 | =          | Deutlich vermehrter Speichel mit leichtem Speichelaustritt.                                  |
| 4 | =          | Ausgeprägter Speichelaustritt, muss ständig Papiertuch oder Taschentuch benutzen.            |
|   |            |                                                                                              |
|   | <b>7.</b>  | <b>Schlucken</b>                                                                             |
| 0 | =          | Normal.                                                                                      |
| 1 | =          | Seltenes Würgen/Verschlucken.                                                                |
| 2 | =          | Gelegentliches Würgen/Verschlucken.                                                          |
| 3 | =          | Weiche Nahrung erforderlich.                                                                 |
| 4 | =          | Ernährung über Magensonde oder Gastrostomie erforderlich.                                    |
|   |            |                                                                                              |
|   | <b>8.</b>  | <b>Handschrift</b>                                                                           |
| 0 | =          | Normal.                                                                                      |
| 1 | =          | Etwas langsam oder klein.                                                                    |
| 2 | =          | Mäßig langsam oder klein; sämtliche Wörter leserlich.                                        |
| 3 | =          | Stark beeinträchtigt: nicht alle Wörter leserlich.                                           |
| 4 | =          | Die Mehrzahl der Wörter ist unleserlich.                                                     |
|   |            |                                                                                              |
|   | <b>9.</b>  | <b>Speisen schneiden und Umgang mit Utensilien</b>                                           |
| 0 | =          | Normal.                                                                                      |
| 1 | =          | Etwas langsam und unbeholfen, aber keine Hilfe erforderlich.                                 |
| 2 | =          | Kann die meisten Speisen schneiden, jedoch unbeholfen und langsam; etwas Hilfe erforderlich. |
| 3 | =          | Speisen müssen von jemandem geschnitten werden, kann aber noch langsam essen.                |
| 4 | =          | Muss gefüttert werden.                                                                       |
|   |            |                                                                                              |
|   | <b>10.</b> | <b>Ankleiden</b>                                                                             |
| 0 | =          | Normal.                                                                                      |
| 1 | =          | Etwas langsam, aber keine Hilfe erforderlich.                                                |
| 2 | =          | Gelegentlich wird Hilfe beim Knöpfen oder beim Schlüpfen in die Ärmel benötigt.              |
| 3 | =          | Beträchtliche Hilfe erforderlich, kann aber manches alleine schaffen.                        |
| 4 | =          | Hilflos.                                                                                     |
|   |            |                                                                                              |
|   | <b>11.</b> | <b>Hygiene</b>                                                                               |
| 0 | =          | Normal.                                                                                      |
| 1 | =          | Etwas langsam, aber keine Hilfe erforderlich.                                                |
| 2 | =          | Braucht beim Duschen und Baden Hilfe; oder bei Körperpflege sehr langsam.                    |
| 3 | =          | Braucht beim Waschen, Zähnebürsten, Haare-kämmen und beim Gang auf die Toilette Hilfe.       |
| 4 | =          | Foley-Katheter oder andere mechanische Hilfsmittel.                                          |



|                              |            |                                                                                                       |
|------------------------------|------------|-------------------------------------------------------------------------------------------------------|
|                              |            |                                                                                                       |
|                              | <b>12.</b> | <b>Umdrehen im Bett und Bettwäsche zurechtziehen</b>                                                  |
| 0                            | =          | Normal.                                                                                               |
| 1                            | =          | Etwas langsam und unbeholfen, benötigt aber keine Hilfe.                                              |
| 2                            | =          | Kann sich alleine, jedoch unter großen Schwierigkeiten umdrehen und die Bettwäsche zurecht ziehen.    |
| 3                            | =          | Beginnt, kann sich aber nicht alleine im Bett umdrehen oder die Bettwäsche zurecht ziehen.            |
| 4                            | =          | Hilflos.                                                                                              |
|                              |            |                                                                                                       |
|                              | <b>13.</b> | <b>Fallen (unabhängig von „Freezing“)</b>                                                             |
| 0                            | =          | Kein.                                                                                                 |
| 1                            | =          | Seltenes Fallen.                                                                                      |
| 2                            | =          | Gelegentliches Fallen, seltener als einmal pro Tag.                                                   |
| 3                            | =          | Fällt durchschnittlich einmal pro Tag.                                                                |
| 4                            | =          | Fällt häufiger als einmal pro Tag.                                                                    |
|                              |            |                                                                                                       |
|                              | <b>14.</b> | <b>„Freezing“ beim gehen</b>                                                                          |
| 0                            | =          | Nicht vorhanden.                                                                                      |
| 1                            | =          | Seltenes „Freezing“ beim Gehen; eventuell verzögerter Start.                                          |
| 2                            | =          | Gelegentliches „Freezing“ beim Gehen.                                                                 |
| 3                            | =          | Häufiges „Freezing“. Gelegentliches Fallen wegen „Freezing“                                           |
| 4                            | =          | Häufiges Fallen wegen „Freezing“.                                                                     |
|                              |            |                                                                                                       |
|                              | <b>15.</b> | <b>Gehen</b>                                                                                          |
| 0                            | =          | Normal.                                                                                               |
| 1                            | =          | Leichte Schwierigkeiten. Eventuell fehlendes Mitschwingen der Arme; eventuell Nachziehen eines Beins. |
| 2                            | =          | Mäßige Schwierigkeiten, benötigt jedoch wenig oder keine Hilfe.                                       |
| 3                            | =          | Schwere Gehstörung, benötigt Hilfe.                                                                   |
| 4                            | =          | Kann selbst mit Hilfe nicht mehr gehen.                                                               |
|                              |            |                                                                                                       |
|                              | <b>16.</b> | <b>Tremor</b>                                                                                         |
| 0                            | =          | Nicht vorhanden.                                                                                      |
| 1                            | =          | Leicht und selten auftretend.                                                                         |
| 2                            | =          | Mäßig; für den Patienten lästig.                                                                      |
| 3                            | =          | Stark; bei zahlreichen Aktivitäten hinderlich.                                                        |
| 4                            | =          | Ausgeprägt; bei den meisten Aktivitäten hinderlich.                                                   |
|                              |            |                                                                                                       |
|                              | <b>17.</b> | <b>Sensorische Beschwerden in Verbindung mit dem Parkinson-Syndrom</b>                                |
| 0                            | =          | Nicht vorhanden.                                                                                      |
| 1                            | =          | Gelegentliches Taubheitsgefühl, Kribbeln oder leichte Schmerzen.                                      |
| 2                            | =          | Häufiges Taubheitsgefühl, Kribbeln oder Schmerzen, nicht störend.                                     |
| 3                            | =          | Häufig schmerzhaft empfindungen.                                                                      |
| 4                            | =          | Unerträgliche Schmerzen.                                                                              |
| <b>SUMME UPDRS II: _____</b> |            |                                                                                                       |

### III. Motorische Untersuchung

|   |                                                |                                                                                                                                          |                          |                          |                          |                          |                          |
|---|------------------------------------------------|------------------------------------------------------------------------------------------------------------------------------------------|--------------------------|--------------------------|--------------------------|--------------------------|--------------------------|
|   | <b>18. Sprache</b>                             |                                                                                                                                          |                          |                          |                          |                          |                          |
| 0 | =                                              | Normal.                                                                                                                                  |                          |                          |                          |                          |                          |
| 1 | =                                              | Leichte Abnahme von Ausdruck, Diktion und/oder Lautstärke.                                                                               |                          |                          |                          |                          |                          |
| 2 | =                                              | Monoton, verwaschen, aber verständlich; mäßig beeinträchtigt.                                                                            |                          |                          |                          |                          |                          |
| 3 | =                                              | Deutliche Beeinträchtigung, schwer zu verstehen.                                                                                         |                          |                          |                          |                          |                          |
| 4 | =                                              | Unverständlich.                                                                                                                          |                          |                          |                          |                          |                          |
|   | <b>19. Gesichtsausdruck</b>                    |                                                                                                                                          |                          |                          |                          |                          |                          |
| 0 | =                                              | Normal.                                                                                                                                  |                          |                          |                          |                          |                          |
| 1 | =                                              | Minimale Hypomimie: könnte ein normales „Poker Gesicht“ sein.                                                                            |                          |                          |                          |                          |                          |
| 2 | =                                              | Leichte, aber eindeutig abnorme Verminderung des Gesichtsausdrucks.                                                                      |                          |                          |                          |                          |                          |
| 3 | =                                              | Mäßige Hypomimie; Mund zeitweise geöffnet.                                                                                               |                          |                          |                          |                          |                          |
| 4 | =                                              | Maskenhaftes oder erstarrtes Gesicht mit stark oder völlig fehlendem Ausdruck; der Mund steht mindestens 1/2 cm offen.                   |                          |                          |                          |                          |                          |
|   | <b>20. Ruhetremor</b>                          |                                                                                                                                          |                          |                          |                          |                          |                          |
|   |                                                | (G = Gesicht, RH = rechte Hand, LH = linke Hand, RF = rechter Fuß, LF = linker Fuß)                                                      |                          |                          |                          |                          |                          |
|   |                                                |                                                                                                                                          | <b>G</b>                 | <b>RH</b>                | <b>LH</b>                | <b>RF</b>                | <b>LF</b>                |
| 0 | =                                              | Nicht vorhanden.                                                                                                                         | <input type="checkbox"/> |
| 1 | =                                              | Leicht und selten vorhanden.                                                                                                             | <input type="checkbox"/> |
| 2 | =                                              | Geringe Amplitude und persistierend; oder mäßige Amplitude, aber nur intermittierend auftretend.                                         | <input type="checkbox"/> |
| 3 | =                                              | Mäßige Amplitude, die meiste Zeit vorhanden.                                                                                             | <input type="checkbox"/> |
| 4 | =                                              | Große Amplitude, die meiste Zeit vorhanden.                                                                                              | <input type="checkbox"/> |
|   | <b>21. Aktions- oder Haltetremor der Hände</b> |                                                                                                                                          |                          |                          |                          |                          |                          |
|   |                                                | (R = rechts, L = links)                                                                                                                  | <b>R</b>                 | <b>L</b>                 |                          |                          |                          |
| 0 | =                                              | Nicht vorhanden.                                                                                                                         | <input type="checkbox"/> | <input type="checkbox"/> |                          |                          |                          |
| 1 | =                                              | Leicht; bei Bewegung vorhanden.                                                                                                          | <input type="checkbox"/> | <input type="checkbox"/> |                          |                          |                          |
| 2 | =                                              | Mäßige Amplitude; bei Bewegung vorhanden.                                                                                                | <input type="checkbox"/> | <input type="checkbox"/> |                          |                          |                          |
| 3 | =                                              | Mäßige Amplitude; bei Beibehalten der Haltung und bei Bewegung vorhanden.                                                                | <input type="checkbox"/> | <input type="checkbox"/> |                          |                          |                          |
| 4 | =                                              | Große Amplitude; beim Essen störend.                                                                                                     | <input type="checkbox"/> | <input type="checkbox"/> |                          |                          |                          |
|   | <b>22. Rigidität</b>                           |                                                                                                                                          |                          |                          |                          |                          |                          |
|   |                                                | (Geprüft bei passiver Bewegung der großen Gelenke am sitzenden Patienten; das Zahnradphänomen kann ignoriert werden.)                    |                          |                          |                          |                          |                          |
|   |                                                | (N = Nacken, ROE = rechte obere Extremität, LOE = linke obere Extremität, RUE = rechte untere Extremität, LUE = linke untere Extremität) |                          |                          |                          |                          |                          |
|   |                                                |                                                                                                                                          | <b>N</b>                 | <b>ROE</b>               | <b>LOE</b>               | <b>RUE</b>               | <b>LUE</b>               |
| 0 | =                                              | Nicht vorhanden.                                                                                                                         | <input type="checkbox"/> |
| 1 | =                                              | Leicht oder nur erkennbar bei Aktivierung durch spiegelbildliche oder andere Bewegungen.                                                 | <input type="checkbox"/> |
| 2 | =                                              | Leicht bis mäßig.                                                                                                                        | <input type="checkbox"/> |
| 3 | =                                              | Ausgeprägt, jedoch voller Bewegungsumfang erhalten.                                                                                      | <input type="checkbox"/> |
| 4 | =                                              | Stark; Schwierigkeiten beim Ausführen aller Bewegungen.                                                                                  | <input type="checkbox"/> |

|   |                                                                                                                                                                                                 |                          |                          |  |
|---|-------------------------------------------------------------------------------------------------------------------------------------------------------------------------------------------------|--------------------------|--------------------------|--|
|   | <b>23. Fingerklopfen</b><br><i>(Patient berührt in rascher Folge und bei größtmöglicher Amplitude, und mit jeder Hand gesondert, den Daumen mit dem Zeigefinger)</i>                            |                          |                          |  |
|   | (R = rechts, L = links)                                                                                                                                                                         | <b>R</b>                 | <b>L</b>                 |  |
| 0 | = Normal.                                                                                                                                                                                       | <input type="checkbox"/> | <input type="checkbox"/> |  |
| 1 | = Leichte Verlangsamung und/oder Verringerung der Amplitude.                                                                                                                                    | <input type="checkbox"/> | <input type="checkbox"/> |  |
| 2 | = Mäßig eingeschränkt. Eindeutige und frühzeitige Ermüdung. Bewegung möglicherweise gelegentlich unterbrochen.                                                                                  | <input type="checkbox"/> | <input type="checkbox"/> |  |
| 3 | = Stark eingeschränkt. Häufig verzögerter Start der Bewegungen oder Unterbrechung fortlaufender Bewegungen.                                                                                     | <input type="checkbox"/> | <input type="checkbox"/> |  |
| 4 | = Kann die Aufgabe kaum ausführen.                                                                                                                                                              | <input type="checkbox"/> | <input type="checkbox"/> |  |
|   |                                                                                                                                                                                                 |                          |                          |  |
|   | <b>24. Handbewegungen</b><br><i>(Patient öffnet und schließt die Hände in rascher Folge bei größtmöglicher Amplitude und mit jeder Hand gesondert)</i>                                          |                          |                          |  |
|   | (R = rechts, L = links)                                                                                                                                                                         | <b>R</b>                 | <b>L</b>                 |  |
| 0 | = Normal.                                                                                                                                                                                       | <input type="checkbox"/> | <input type="checkbox"/> |  |
| 1 | = Leichte Verlangsamung und/oder Verringerung der Amplitude.                                                                                                                                    | <input type="checkbox"/> | <input type="checkbox"/> |  |
| 2 | = Mäßig eingeschränkt. Eindeutige und frühzeitige Ermüdung. Gelegentliche Unterbrechung der Bewegung möglich.                                                                                   | <input type="checkbox"/> | <input type="checkbox"/> |  |
| 3 | = Stark eingeschränkt. Häufig verzögerter Start der Bewegungen oder Unterbrechung fortlaufender Bewegungen.                                                                                     | <input type="checkbox"/> | <input type="checkbox"/> |  |
| 4 | = Kann die Aufgabe kaum ausführen.                                                                                                                                                              | <input type="checkbox"/> | <input type="checkbox"/> |  |
|   |                                                                                                                                                                                                 |                          |                          |  |
|   | <b>25. Rasch wechselnde Bewegungen der Hände</b><br><i>(Pronations/Supinationsbewegungen der Hände, vertikal oder horizontal, mit größtmöglicher Amplitude, beide Hände gleichzeitig)</i>       |                          |                          |  |
|   | (R = rechts, L = links)                                                                                                                                                                         | <b>R</b>                 | <b>L</b>                 |  |
| 0 | = Normal.                                                                                                                                                                                       | <input type="checkbox"/> | <input type="checkbox"/> |  |
| 1 | = Leichte Verlangsamung und/oder Verringerung der Amplitude.                                                                                                                                    | <input type="checkbox"/> | <input type="checkbox"/> |  |
| 2 | = Mäßig eingeschränkt. Eindeutige und frühzeitige Ermüdung. Gelegentliche Unterbrechung der Bewegung möglich.                                                                                   | <input type="checkbox"/> | <input type="checkbox"/> |  |
| 3 | = Stark eingeschränkt. Häufig verzögerter Start der Bewegungen oder Unterbrechung fortlaufender Bewegungen.                                                                                     | <input type="checkbox"/> | <input type="checkbox"/> |  |
| 4 | = Kann die Aufgabe kaum ausführen.                                                                                                                                                              | <input type="checkbox"/> | <input type="checkbox"/> |  |
|   |                                                                                                                                                                                                 |                          |                          |  |
|   | <b>26. Beweglichkeit der Beine</b><br><i>(Der Patient klopft in rascher Folge mit der Ferse auf den Boden und hebt dabei das ganze Bein an. Die Amplitude sollte mindestens 10 cm betragen)</i> |                          |                          |  |
|   | (R = rechts, L = links)                                                                                                                                                                         | <b>R</b>                 | <b>L</b>                 |  |
| 0 | = Normal.                                                                                                                                                                                       | <input type="checkbox"/> | <input type="checkbox"/> |  |
| 1 | = Leichte Verlangsamung und/oder Verringerung der Amplitude.                                                                                                                                    | <input type="checkbox"/> | <input type="checkbox"/> |  |
| 2 | = Mäßig eingeschränkt. Eindeutige und frühzeitige Ermüdung. Gelegentliche Unterbrechung der Bewegung möglich.                                                                                   | <input type="checkbox"/> | <input type="checkbox"/> |  |
| 3 | = Stark eingeschränkt. Häufig verzögerter Start der Bewegungen oder Unterbrechung fortlaufender Bewegungen.                                                                                     | <input type="checkbox"/> | <input type="checkbox"/> |  |
| 4 | = Kann die Aufgabe kaum ausführen.                                                                                                                                                              | <input type="checkbox"/> | <input type="checkbox"/> |  |

|                               |            |                                                                                                                                                                                                                                                    |  |  |  |
|-------------------------------|------------|----------------------------------------------------------------------------------------------------------------------------------------------------------------------------------------------------------------------------------------------------|--|--|--|
|                               |            |                                                                                                                                                                                                                                                    |  |  |  |
|                               | <b>27.</b> | <b>Vom Stuhl aufstehen</b><br><i>(Der Patient versucht mit vor der Brust verschränkten Armen von einem Holz- oder Metallstuhl mit gerader Lehne aufzustehen)</i>                                                                                   |  |  |  |
| 0                             | =          | Normal.                                                                                                                                                                                                                                            |  |  |  |
| 1                             | =          | Langsam; benötigt eventuell mehr als einen Versuch.                                                                                                                                                                                                |  |  |  |
| 2                             | =          | Drückt sich an den Armlehnen hoch.                                                                                                                                                                                                                 |  |  |  |
| 3                             | =          | Neigt zum Zurückfallen und muss es eventuell mehrmals versuchen, kann jedoch ohne Hilfe aufstehen.                                                                                                                                                 |  |  |  |
| 4                             | =          | Kann ohne Hilfe nicht aufstehen.                                                                                                                                                                                                                   |  |  |  |
|                               |            |                                                                                                                                                                                                                                                    |  |  |  |
|                               | <b>28.</b> | <b>Haltung</b>                                                                                                                                                                                                                                     |  |  |  |
| 0                             | =          | Normal aufrecht.                                                                                                                                                                                                                                   |  |  |  |
| 1                             | =          | Nicht ganz aufrecht, leicht vorgebeugte Haltung; könnte bei einem älteren Menschen normal sein.                                                                                                                                                    |  |  |  |
| 2                             | =          | Mäßig vorgebeugte Haltung, eindeutig abnorm; kann leicht zu einer Seite geneigt sein.                                                                                                                                                              |  |  |  |
| 3                             | =          | Stark vorgebeugte Haltung mit Kyphose; kann mäßig zu einer Seite geneigt sein.                                                                                                                                                                     |  |  |  |
| 4                             | =          | Ausgeprägte Beugung mit extrem abnormer Haltung.                                                                                                                                                                                                   |  |  |  |
|                               |            |                                                                                                                                                                                                                                                    |  |  |  |
|                               | <b>29.</b> | <b>Gang</b>                                                                                                                                                                                                                                        |  |  |  |
| 0                             | =          | Normal.                                                                                                                                                                                                                                            |  |  |  |
| 1                             | =          | Geht langsam, schlurft eventuell kleinschrittig, jedoch keine Festination oder Propulsion.                                                                                                                                                         |  |  |  |
| 2                             | =          | Gehen schwierig, benötigt aber wenig oder keine Hilfe; eventuell leichtes Trippeln. kurze Schritte oder Propulsion.                                                                                                                                |  |  |  |
| 3                             | =          | Starke Gehstörung, benötigt Hilfe.                                                                                                                                                                                                                 |  |  |  |
| 4                             | =          | Kann überhaupt nicht gehen, auch nicht mit Hilfe.                                                                                                                                                                                                  |  |  |  |
|                               |            |                                                                                                                                                                                                                                                    |  |  |  |
|                               | <b>30.</b> | <b>Haltungsstabilität</b><br><i>(Reaktion auf plötzliches Verlagern nach hinten durch Ziehen an den Schultern des Patienten, der mit geöffneten Augen und leicht auseinander stehenden Füßen gerade steht. Der Patient ist darauf vorbereitet)</i> |  |  |  |
| 0                             | =          | Normal.                                                                                                                                                                                                                                            |  |  |  |
| 1                             | =          | Retropulsion, gleicht aber ohne Hilfe aus.                                                                                                                                                                                                         |  |  |  |
| 2                             | =          | Fehlen einer Haltungsreaktion; würde fallen, wenn er nicht vom Untersucher aufgefangen würde.                                                                                                                                                      |  |  |  |
| 3                             | =          | Sehr instabil; neigt dazu, spontan das Gleichgewicht zu verlieren.                                                                                                                                                                                 |  |  |  |
| 4                             | =          | Kann nicht ohne Unterstützung stehen.                                                                                                                                                                                                              |  |  |  |
|                               |            |                                                                                                                                                                                                                                                    |  |  |  |
|                               | <b>31.</b> | <b>Bradykinesie und Hypokinesie des Körpers</b><br><i>(Kombination aus Langsamkeit, Zögern, verminderten Mitbewegungen der Arme, geringe Bewegungsamplitude und allgemeiner Bewegungsarmut)</i>                                                    |  |  |  |
| 0                             | =          | Nicht vorhanden.                                                                                                                                                                                                                                   |  |  |  |
| 1                             | =          | Minimale Verlangsamung, Bewegung wirkt beabsichtigt; könnte bei manchen Menschen normal sein. Möglicherweise verringerte Amplitude.                                                                                                                |  |  |  |
| 2                             | =          | Leichte Verlangsamung und Bewegungsarmut, die eindeutig abnorm sind. Alternativ auch verringerte Amplitude.                                                                                                                                        |  |  |  |
| 3                             | =          | Mäßige Verlangsamung und Bewegungsarmut oder Verringerung der Amplitude.                                                                                                                                                                           |  |  |  |
| 4                             | =          | Ausgeprägte Verlangsamung, Bewegungsarmut oder Verringerung der Amplitude.                                                                                                                                                                         |  |  |  |
| <b>SUMME UPDRS III:</b> _____ |            |                                                                                                                                                                                                                                                    |  |  |  |

#### IV. Komplikationen der Behandlung

|   | A          | DYSKINESIEN                                                                                                                                                  |
|---|------------|--------------------------------------------------------------------------------------------------------------------------------------------------------------|
|   |            |                                                                                                                                                              |
|   | <b>32.</b> | <b>Dauer: Wie lange sind die Dyskinesien während der Wachzeit vorhanden?</b><br><i>(Anamnestische Angaben)</i>                                               |
| 0 | =          | Nicht vorhanden.                                                                                                                                             |
| 1 | =          | 1 - 25 % des Tages.                                                                                                                                          |
| 2 | =          | 26 - 50 % des Tages.                                                                                                                                         |
| 3 | =          | 51 - 75 % des Tages.                                                                                                                                         |
| 4 | =          | 76 -100% des Tages.                                                                                                                                          |
|   |            |                                                                                                                                                              |
|   | <b>33.</b> | <b>Behinderung: Wie hinderlich sind die Dyskinesien?</b><br><i>(Anamnestische Angaben: können durch Untersuchung in der Sprechstunde modifiziert werden)</i> |
| 0 | =          | 0= Keine Behinderung.                                                                                                                                        |
| 1 | =          | Leichte Behinderung.                                                                                                                                         |
| 2 | =          | Mäßige Behinderung.                                                                                                                                          |
| 3 | =          | Starke Behinderung.                                                                                                                                          |
| 4 | =          | Vollständige Behinderung.                                                                                                                                    |
|   |            |                                                                                                                                                              |
|   | <b>34.</b> | <b>Schmerzhafte Dyskinesien: Wie schmerzhaft sind die Dyskinesien?</b>                                                                                       |
| 0 | =          | Keine schmerzhaften Dyskinesien.                                                                                                                             |
| 1 | =          | Leicht.                                                                                                                                                      |
| 2 | =          | Mäßig.                                                                                                                                                       |
| 3 | =          | Stark.                                                                                                                                                       |
| 4 | =          | Ausgeprägt.                                                                                                                                                  |
|   |            |                                                                                                                                                              |
|   | <b>35.</b> | <b>Auftreten von Dystonie am frühen Morgen?</b> <i>(Anamnestische Angaben)</i>                                                                               |
| 0 | =          | Nein.                                                                                                                                                        |
| 1 | =          | Ja.                                                                                                                                                          |
|   |            |                                                                                                                                                              |
|   | <b>B</b>   | <b>FLUKTUATIONEN</b>                                                                                                                                         |
|   |            |                                                                                                                                                              |
|   | <b>36.</b> | <b>Gibt es nach einer Medikamenteneinnahme zeitlich vorhersagbare „Off“-Perioden?</b>                                                                        |
| 0 | =          | Nein.                                                                                                                                                        |
| 1 | =          | Ja.                                                                                                                                                          |
|   |            |                                                                                                                                                              |
|   | <b>37.</b> | <b>Gibt es zeitlich nicht vorhersagbare „Off“-Perioden?</b>                                                                                                  |
| 0 | =          | Nein.                                                                                                                                                        |
| 1 | =          | Ja.                                                                                                                                                          |
|   |            |                                                                                                                                                              |
|   | <b>38.</b> | <b>Treten „Off“-Perioden plötzlich auf, z. B. innerhalb von wenigen Sekunden?</b>                                                                            |
| 0 | =          | Nein.                                                                                                                                                        |
| 1 | =          | Ja.                                                                                                                                                          |
|   |            |                                                                                                                                                              |
|   | <b>39.</b> | <b>Für welche Dauer befindet sich der Patient tagsüber durchschnittlich im „Off“-Stadium?</b>                                                                |
| 0 | =          | Überhaupt nicht.                                                                                                                                             |
| 1 | =          | 1 - 25 % des Tages.                                                                                                                                          |
| 2 | =          | 26 - 50 % des Tages.                                                                                                                                         |
| 3 | =          | 51 - 75 % des Tages.                                                                                                                                         |
| 4 | =          | 76 -100% des Tages.                                                                                                                                          |

|                              | <b>C</b>   | <b>VEGETATIVUM</b>                                                                      |
|------------------------------|------------|-----------------------------------------------------------------------------------------|
|                              |            |                                                                                         |
|                              | <b>40.</b> | <b>Leidet der Patient an Appetitlosigkeit, Übelkeit oder Erbrechen?</b>                 |
| 0                            | =          | Nein.                                                                                   |
| 1                            | =          | Ja.                                                                                     |
|                              |            |                                                                                         |
|                              | <b>41.</b> | <b>Leidet der Patient an Schlafstörungen, z. B. Schlaflosigkeit oder Schläfrigkeit?</b> |
| 0                            | =          | Nein.                                                                                   |
| 1                            | =          | Ja.                                                                                     |
|                              |            |                                                                                         |
|                              | <b>42.</b> | <b>Hat der Patient orthostatische Symptome?</b>                                         |
| 0                            | =          | Nein.                                                                                   |
| 1                            | =          | Ja.                                                                                     |
| <b>SUMME UPDRS IV: _____</b> |            |                                                                                         |

## 5 Schwab & England Skala der Aktivitäten des täglichen Lebens

|             |   |                                                                                                                                                                                              |
|-------------|---|----------------------------------------------------------------------------------------------------------------------------------------------------------------------------------------------|
| <b>100%</b> | = | Völlig unabhängig. Kann sämtliche Verrichtungen ohne Verlangsamung, Schwierigkeiten oder Behinderung ausführen. Völlig gesund. Keine Schwierigkeiten wahrgenommen.                           |
| <b>90%</b>  | = | Völlig unabhängig. Kann sämtliche Verrichtungen mit geringer Verlangsamung, Schwierigkeiten und Behinderung ausführen. Kann doppelt so lange dazu brauchen. Schwierigkeiten werden bewusst.  |
| <b>80%</b>  | = | Bei den meisten Verrichtungen völlig unabhängig. Braucht dafür doppelt so viel Zeit. Ist sich der Schwierigkeiten und Verlangsamung bewusst.                                                 |
| <b>70%</b>  | = | Nicht völlig unabhängig. Bei manchen Verrichtungen größere Schwierigkeiten. Braucht für einige drei- bis viermal so lange. Muss einen großen Teil des Tages auf die Verrichtungen verwenden. |
| <b>60%</b>  | = | Leichte Abhängigkeit. Kann die meisten Verrichtungen ausführen, jedoch äußerst langsam und unter viel Anstrengung; manchmal unmöglich; Fehler.                                               |
| <b>50%</b>  | = | Stärker abhängig. Hilfe bei der Hälfte der Verrichtungen, langsamer usw. Schwierigkeiten bei allem.                                                                                          |
| <b>40%</b>  | = | Sehr abhängig. Kann bei sämtlichen Verrichtungen mithelfen, nur einige alleine sehr langsam.                                                                                                 |
| <b>30%</b>  | = | Kann bei Anstrengungen hier und da einige Verrichtungen alleine ausführen oder beginnen. Benötigt viel Hilfe.                                                                                |
| <b>20%</b>  | = | Kann nichts alleine tun. Kann bei manchen Verrichtungen etwas mithelfen. Stark behindert.                                                                                                    |
| <b>10%</b>  | = | Völlig abhängig, hilflos. Völlig behindert.                                                                                                                                                  |
| <b>0%</b>   | = | Vegetative Funktionen wie Schlucken, Blasen- und Stuhlentleerung sind ausgefallen. Bettlägerig.                                                                                              |

## 6 Mini-Mental Status Examination – MMSE

### 1. Orientierung (jeweils 1 Punkt für jede richtige Antwort)

- 1. Datum
- 2. Wochentag
- 3. Monat
- 4. Jahr
- 5. Jahreszeit
- 6. Bundesland
- 7. Land
- 8. Stadt
- 9. Klinik / Praxis / Altersheim
- 10. Stockwerk

### 2. Merkfähigkeit (VL nennt nebenstehende Begriffe und fordert Pb anschließend zur Reproduktion auf; es wird 1 Punkt für jede richtige Antwort vergeben. Bitte Pb daran erinnern, sich die Worte zu merken.)

- 11. Auto
- 12. Blume
- 13. Kerze

### 3. Aufmerksamkeit und Rechenfähigkeit (In 7-er- Schritten, beginnend bei 100, rückwärts zählen; Abbruch bei 5 Antworten; 1 Punkt / richtige Antwort. Bei falscher Antwort richtiges Ergebnis nennen. Von korrektem Ergebnis aus folgt die nächste Subtraktion.)

- 14. 93
- 15. 86
- 16. 79
- 17. 72
- 18. 65

### 4. Erinnerungsfähigkeit (Den Pb nach den 2. genannten Wörtern fragen; 1 Punkt / richtige Nennung)

- 19. Auto
- 20. Blume
- 21. Kerze

### 5. Sprache (1 Punkt für jede korrekte Antwort/ Handlung)

- 22. Armbanduhr benennen
- 23. Bleistift benennen
- 24. Nachsprechen des Satzes:  
,Sie leiht ihm kein Geld mehr.'
- 25. Blatt Papier in die rechte  
Hand
- 26. – in der Mitte falten
- 27. – auf den Tisch legen
- 28. Anweisung vorlesen und  
befolgen
- 29. Schreiben eines vollständigen  
Satzes
- 30. Nachzeichnen

**Gesamt**



**Bitte schließen Sie die Augen!**

Bitte schreiben Sie einen Satz!

---

---

---

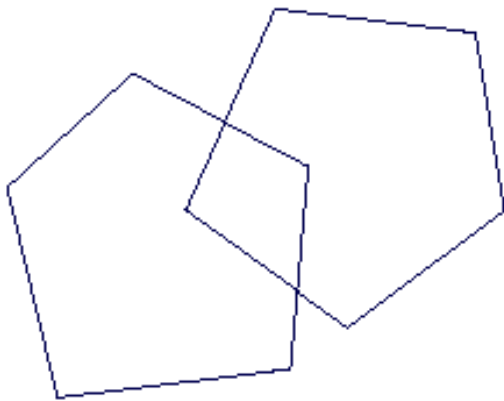

7a

# Uhrentest

---

Bitte zeichnen Sie eine Uhr!

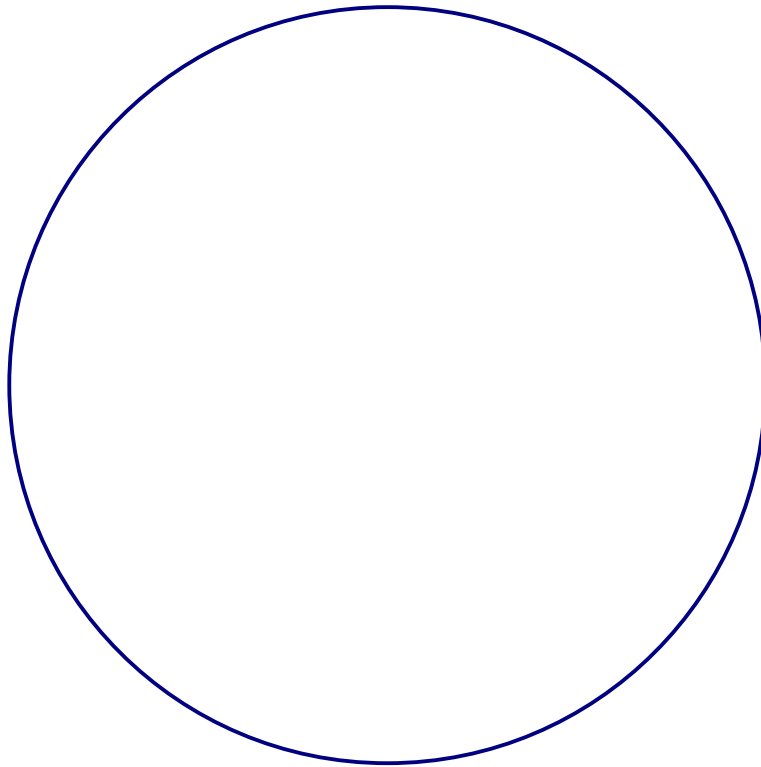

---

Bezeichnen Sie die Zeit auf Ihrer Uhr so, wie sie z.B. in einem Fahrplan stünde.

# Uhrentest

## Manual zur Durchführung und Auswertung

Der Uhrentest wird in der Neurologie und Neuropsychologie seit vielen Jahren verwendet. Er erlaubt es, in sehr kurzer Zeit wichtige kognitive Aspekte der Demenz zu untersuchen (Gedächtnis, konstruktive Praxis, exekutive Funktionen, Sprache, Erkennen). Dieses Screeningverfahren wurde in einer retrospektiven Studie an der Memory Clinic des Universitätsspitals Basel an 176 dementen Patienten und 88 kognitiv gesunden älteren Probanden untersucht (Thalmann et al., 2002). Es konnte gezeigt werden, dass von 36 in der Literatur erwähnten Auswertungskriterien die folgenden vier am besten zwischen Gesunden und Dementen trennten:

1. Sind 12 Zahlen vorhanden?
2. Ist die Zahl „12“ oben?
3. Sind zwei unterscheidbare Zeiger vorhanden?
4. Stimmt die gezeichnete Zeit mit der Zeit im „Fahrplanformat“ überein?

Unter Zuhilfenahme eines einfachen Punktesystems konnten mit dem Uhrentest alleine bereits 136 von 176 Dementen (= 77% Sensitivität) und 66 von 88 Gesunden (= 75% Spezifität) richtig diagnostiziert werden.

Die folgenden Unterlagen wurden absichtlich so zusammengestellt, dass die beiden Tests möglichst von allen Untersuchenden immer genau gleich gemacht werden. In blauer Schrift sind die mündlichen Instruktionen geschrieben, die Sie dem Patienten geben. In schwarzer Schrift finden Sie ergänzende Instruktionen und Informationen für Sie.

### Einführung

Bitte stellen Sie sicher, dass Sie ungestört (Telephon, Praxishilfe) sind. Sagen Sie zum Patienten etwa folgendes:

Ich möchte nun einen kurzen Test mit Ihnen durchführen. Einige der Aufgaben werden einfacher, andere schwieriger sein. Versuchen Sie bitte, sich so gut wie möglich zu konzentrieren. Wenn Sie eine Antwort nicht wissen, dürfen Sie ruhig raten. Sind Sie bereit? Gut, dann lassen Sie uns beginnen.

Legen Sie das Blatt mit der Aufschrift „Bitte zeichnen Sie eine Uhr“ und dem vorgegebenen Kreis dem Patienten hin.

### Instruktion Zeichnung

Bitte zeichnen Sie eine Uhr mit allen Zahlen und Zeigern die nötig sind und sagen Sie mir, wenn Sie fertig sind.

### Zusätzliches

Bei Fragen wiederholen Sie nur die Testinstruktion unter Verwendung von Synonymen, wie z.B. „Zifferblatt“ statt „Uhr“ oder „Ziffern“ statt „Zahlen“, etc. Sollte der Patient z.B. fragen, ob er statt der Zahlen nur Striche zeichnen darf, sagen Sie ihm, dass er beides machen soll.

### Instruktion Uhrzeit eintragen

Bitte schreiben Sie nun die Uhrzeit in Ihrer gezeichneten Uhr in den unteren Kasten – so wie es z.B. im Fernsehheft oder im Zugfahrplan stehen würde.

|                                                                       | Nur Uhrentest gemacht |
|-----------------------------------------------------------------------|-----------------------|
| Sind 12 Zahlen vorhanden?                                             | 1                     |
| Ist die Zahl „12“ oben?                                               | 2                     |
| Sind zwei unterscheidbare Zeiger vorhanden? (z.B. Dicke oder Länge)   | 2                     |
| Stimmt die gezeichnete Zeit mit der Zeit im „Fahrplanformat“ überein? | 2                     |

**1. Verbale Flüssigkeit: Kategorie 'Tiere'**

Zeitintervalle:

**TIERE**

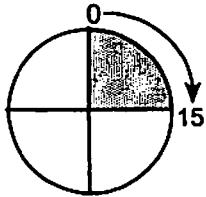

.....

.....

.....

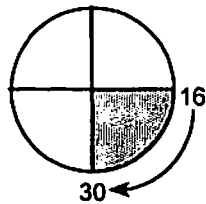

.....

.....

.....

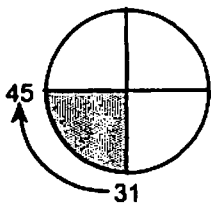

.....

.....

.....

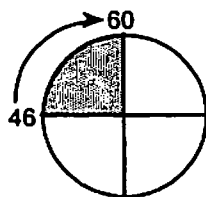

.....

.....

.....

**Bewertung:**

**Richtige**

0 - 15 Sekunden

|  |  |
|--|--|
|  |  |
|--|--|

16 - 30 Sekunden

|  |  |
|--|--|
|  |  |
|--|--|

31 - 45 Sekunden

|  |  |
|--|--|
|  |  |
|--|--|

46 - 60 Sekunden

|  |  |
|--|--|
|  |  |
|--|--|

**Total**

|  |  |
|--|--|
|  |  |
|--|--|

# 1. Verbale Flüssigkeit: Kategorie 'Tiere'

Dieser Test misst einerseits Störungen in der verbalen Produktion, andererseits ist es ein Test zur Untersuchung des semantischen Gedächtnis und der Sprache.

## Instruktion:

**"Ich werde Ihnen eine Kategorie nennen und möchte, dass Sie so schnell Sie können alle Dinge aufzählen, die in diese Kategorie gehören. Wenn ich zum Beispiel 'Kleidungsstücke' sage, können Sie 'Hemd', 'Krawatte' oder 'Hut', usw. aufzählen. Können Sie mir weitere Kleidungsstücke nennen?"**

Warten Sie bis die TP zwei Wörter genannt hat. Gelingt es ihr, dann sagen Sie, dass die Antworten korrekt sind und fahren sie mit dem eigentlichen Test (Kategorie 'Tiere') fort.

Nennt die TP ein falsches Wort oder gibt eine unpassende Antwort, korrigieren sie die Antwort und wiederholen sie die Instruktion. Misslingt es der TP abermals zu antworten, wiederholen sie die Instruktion ein zweites Mal. Wenn es eindeutig wird, dass die TP die Instruktion immer noch nicht versteht, beenden sie diese Aufgabe und klären sie ab, weshalb dies so ist.

Wenn sie überzeugt sind, dass die TP die Aufgabe versteht und zwei Wörter genannt hat, die Kleidungsstücke bezeichnen, sagen Sie:

**"Gut! Ich möchte Sie nun bitten, mir alle Dinge aufzuzählen, die zu einer anderen Kategorie gehören nämlich zur Kategorie 'Tiere'. Sie haben eine Minute Zeit. Sind Sie bereit? Bitte beginnen Sie!"**

Die Bearbeitungszeit dieses Tests ist auf 60 Sekunden beschränkt. Hört die TP vor Ablauf dieser Zeit auf, ermutigen Sie sie weitere Wörter zu finden. Nennt er/sie länger als 15 Sekunden keine Tiere, wiederholen Sie die Instruktion ("Zählen Sie mir alle Tiere auf, die Ihnen in den Sinn kommen"). Auch wenn die Instruktion während der Untersuchung wiederholt werden muss, wird kein Zeitzuschlag gewährt!

## Bewertung:

Im Verlaufsprotokoll werden die Antworten entsprechend den vier 15-Sekunden-Intervallen notiert. Der Punktwert der TP ist die Summe der korrekten Tierennungen aus jedem 15 Sekunden-Intervall. Korrekt als 'Tier' bewertet wird alles, was lebendig ist und weder Pflanze noch Mineral darstellt. Jeder Vertreter des Tierreiches, real oder fiktiv, jede männliche, weibliche und kindliche Tierbezeichnung, jede Tierart oder -rasse innerhalb einer Spezies wird als richtig bewertet. Ausnahmen bilden Repetitionen und Eigennamen.

Beispiele für die Bewertung:

| <u>Antworten</u>   | <u>Punkte</u>  |
|--------------------|----------------|
| Hund .....         | 1              |
| Terrier .....      | 1              |
| Dackel .....       | 1              |
| Köter .....        | 1              |
| Grosser Hund ..... | 0 - Repetition |
| Welpen .....       | 1              |
| Hündin .....       | 1              |
| Fido .....         | 0 - Eigename   |
| Einhorn .....      | 1              |
| Amöbe .....        | 1              |
| Hundebaby .....    | 0 - Repetition |
| Grizzly .....      | 1              |
| Braunbär .....     | 1              |

## 8 Pill-Questionnaire (nach Dubois et al., 2007)

### Teil A

Untersucher, offene Frage:

„Welche Tabletten (gegen Parkinson) nehmen Sie täglich ein?“

Lassen Sie den Patienten frei sprechen und notieren Sie die Kernaussagen.

#### Teil A1 - weitere Beurteilung:

Der Patient kennt den Namen seiner Tabletten

JA  NEIN

Der Patient weiß in welcher Dosis er seine Tabletten einnimmt

JA  NEIN

Der Patient kennt den Zeitplan seiner Medikamente

JA  NEIN

Der Patient weiß welche Farben die Tabletten haben

JA  NEIN

Beurteilen Sie die Aussagen des Patienten:

Wenn der Patient die Namen oder die Farbe, Dosis und Zeitplan seiner Parkinsonmedikamente beschreiben kann (mind. 3 Ja-Antworten) → keine Auswirkung auf die Alltagsfähigkeit, d.h. selbständige Tabletteneinnahme.

Der Patient nimmt seine Tabletten selbstständig ein

JA  NEIN

Wenn „Nein“ gehen Sie weiter zu Teil B

### Teil B

#### Teil B1 - Hilfestellung

Falls Teil A mit „Nein“ beurteilt wurde:

Falls der Patient weder Name, Dosis, Zeitplan oder Farbe seiner Medikamente beschreiben kann, fragen Sie gezielt nach:

„Wie heißen Ihre Tabletten?“

„Nach welchem Zeitplan nehmen Sie Ihre Tabletten ein?“

„Welche Farbe haben Ihre Tabletten?“

Kann der Patient die Namen oder die Farben, Dosis und Zeitplan seiner Parkinsonmedikamente beschreiben?

JA  NEIN

## Teil B2 – Angehörigenbefragung (sofern vorhanden)

Falls Teil A mit „nein“ beurteilt wurde:

1. *Nimmt Ihr Angehöriger seine Tabletten vollkommen selbstständig und ohne Kontrolle ein?*  JA  NEIN

2. *Muss Ihr Angehöriger manchmal daran erinnert werden seine Tabletten einzunehmen?*  JA  NEIN

Wenn die erste Frage mit „Ja“ beantwortet wurde und die zweite Frage mit „Nein“, dann selbstständige Tabletteneinnahme. Wenn die erste Frage mit „Nein“ beantwortet wurde, dann weiter zu den Zusatzfragen 3 und 4:

3. *Muss Ihr Angehöriger immer daran erinnert werden seine Tabletten einzunehmen?*  JA  NEIN

4. *Kam es schon einmal zu einem Zwischenfall (musste der Arzt gerufen werden) weil Ihr Angehöriger seine Tabletten falsch eingenommen hat?*  JA  NEIN

Wenn beide Fragen mit „nein“ beantwortet wurden, kann der Patient selbstständig seine Tabletten einnehmen.

Abschließende Beurteilung des Teil B:

Wenn der Patient die Namen oder die Farben, Dosis und Zeitplan seiner Parkinsonmedikamente beschreiben kann und dieses von dem Angehörigen bestätigt wird, liegt keine Alltagseinschränkung vor, d.h. selbstständige Tabletteneinnahme.

**Selbstständige Tabletteneinnahme:**  JA  NEIN



# Non-Motor Symptom assessment scale for Parkinson's Disease

**9**

**Patient ID No:** \_\_\_\_\_

**Initials:** \_\_\_\_\_

**Age:** \_\_\_\_\_

Symptoms assessed over the last month. Each symptom scored with respect to:

Severity: 0 = None, 1 = Mild: symptoms present but causes little distress or disturbance to patient; 2 = Moderate: some distress or disturbance to patient; 3 = Severe: major source of distress or disturbance to patient.

Frequency: 1 = Rarely (<1/wk); 2 = Often (1/wk); 3 = Frequent (several times per week); 4 = Very Frequent (daily or all the time)

Domains will be weighed differentially. Yes/ No answers are not included in final frequency x severity calculation. (Bracketed text in questions within the scale is included as an explanatory aid).

**Domain 1: Cardiovascular including falls**

|                                                                                                                  | <b>Severity</b>          | <b>Frequency</b>         | <b>Frequency<br/>x Severity</b>                         |
|------------------------------------------------------------------------------------------------------------------|--------------------------|--------------------------|---------------------------------------------------------|
| 1. Does the patient experience light-headedness, dizziness, weakness on standing from sitting or lying position? | <input type="checkbox"/> | <input type="checkbox"/> | <input type="checkbox"/>                                |
| 2. Does the patient fall because of fainting or blacking out?                                                    | <input type="checkbox"/> | <input type="checkbox"/> | <input type="checkbox"/>                                |
| <b>SCORE:</b>                                                                                                    |                          |                          | <input style="width: 50px; height: 20px;" type="text"/> |

**Domain 2: Sleep/fatigue**

|                                                                                                                                                                                       |                          |                          |                                                         |
|---------------------------------------------------------------------------------------------------------------------------------------------------------------------------------------|--------------------------|--------------------------|---------------------------------------------------------|
| 3. Does the patient doze off or fall asleep unintentionally during daytime activities? (For example, during conversation, during mealtimes, or while watching television or reading). | <input type="checkbox"/> | <input type="checkbox"/> | <input type="checkbox"/>                                |
| 4. Does fatigue (tiredness) or lack of energy (not slowness) limit the patient's daytime activities?                                                                                  | <input type="checkbox"/> | <input type="checkbox"/> | <input type="checkbox"/>                                |
| 5. Does the patient have difficulties falling or staying asleep?                                                                                                                      | <input type="checkbox"/> | <input type="checkbox"/> | <input type="checkbox"/>                                |
| 6. Is the patient aware or has he/she been told about talking during sleep or moving about as if acting-out a dream?                                                                  | <input type="checkbox"/> | <input type="checkbox"/> | <input type="checkbox"/>                                |
| 7. Does the patient experience an urge to move the legs or restlessness in legs that improves with movement when he/she is sitting or lying down inactive?                            | <input type="checkbox"/> | <input type="checkbox"/> | <input type="checkbox"/>                                |
| <b>SCORE:</b>                                                                                                                                                                         |                          |                          | <input style="width: 50px; height: 20px;" type="text"/> |

**Domain 3: Mood /Cognition**

|                                                                                                                              |                          |                          |                                                         |
|------------------------------------------------------------------------------------------------------------------------------|--------------------------|--------------------------|---------------------------------------------------------|
| 8. Has the patient lost interest in his/her surroundings?                                                                    | <input type="checkbox"/> | <input type="checkbox"/> | <input type="checkbox"/>                                |
| 9. Has the patient lost interest in doing things or lack motivation to start new activities?                                 | <input type="checkbox"/> | <input type="checkbox"/> | <input type="checkbox"/>                                |
| 10. Does the patient look dazed or unaware of what is going on? (Not just when drowsy or falling asleep?)                    | <input type="checkbox"/> | <input type="checkbox"/> | <input type="checkbox"/>                                |
| 11. Does the patient feel nervous, worried or frightened for no apparent reason?                                             | <input type="checkbox"/> | <input type="checkbox"/> | <input type="checkbox"/>                                |
| 12. Does the patient seem sad or depressed or has he/she reported such feelings?                                             | <input type="checkbox"/> | <input type="checkbox"/> | <input type="checkbox"/>                                |
| 13. Does the patient have flat moods without the normal "highs" and "lows"?                                                  | <input type="checkbox"/> | <input type="checkbox"/> | <input type="checkbox"/>                                |
| 14. Does the patient have difficulty in experiencing pleasure from their usual activities or report that they lack pleasure? | <input type="checkbox"/> | <input type="checkbox"/> | <input type="checkbox"/>                                |
| <b>SCORE:</b>                                                                                                                |                          |                          | <input style="width: 50px; height: 20px;" type="text"/> |

**Domain 4: Perceptual problems/hallucinations**

|                                                                                                                                   |                          |                          |                                                         |
|-----------------------------------------------------------------------------------------------------------------------------------|--------------------------|--------------------------|---------------------------------------------------------|
| 15. Does the patient indicate that he/she sees things that are not there?                                                         | <input type="checkbox"/> | <input type="checkbox"/> | <input type="checkbox"/>                                |
| 16. Does the patient have beliefs that you know are not true? (For example, about being harmed, being robbed or being unfaithful) | <input type="checkbox"/> | <input type="checkbox"/> | <input type="checkbox"/>                                |
| 17. Does the patient experience double vision? (2 separate real objects and not blurred vision)                                   | <input type="checkbox"/> | <input type="checkbox"/> | <input type="checkbox"/>                                |
| <b>SCORE:</b>                                                                                                                     |                          |                          | <input style="width: 50px; height: 20px;" type="text"/> |

**Severity**    **Frequency**    **Frequency  
x Severity**

**Domain 5: Attention/ Memory**

18. Does the patient have problems sustaining concentration during activities?  
(For example, reading or having a conversation)
19. Does the patient forget things that he/she has been told a short time ago or events that happened in the last few days?
20. Does the patient forget to do things?  
(For example, take tablets or turn off domestic appliances?)

|                          |                          |                          |
|--------------------------|--------------------------|--------------------------|
| <input type="checkbox"/> | <input type="checkbox"/> | <input type="checkbox"/> |
| <input type="checkbox"/> | <input type="checkbox"/> | <input type="checkbox"/> |
| <input type="checkbox"/> | <input type="checkbox"/> | <input type="checkbox"/> |

**SCORE:**

**Domain 6: Gastrointestinal tract**

21. Does the patient dribble saliva during the day?
22. Does the patient having difficulty swallowing?
23. Does the patient suffer from constipation?  
(Bowel action less than three times weekly)

|                          |                          |                          |
|--------------------------|--------------------------|--------------------------|
| <input type="checkbox"/> | <input type="checkbox"/> | <input type="checkbox"/> |
| <input type="checkbox"/> | <input type="checkbox"/> | <input type="checkbox"/> |
| <input type="checkbox"/> | <input type="checkbox"/> | <input type="checkbox"/> |

**SCORE:**

**Domain 7: Urinary**

24. Does the patient have difficulty holding urine? (Urgency)
25. Does the patient have to void within 2 hours of last voiding? (Frequency)
26. Does the patient have to get up regularly at night to pass urine? (Nocturia)

|                          |                          |                          |
|--------------------------|--------------------------|--------------------------|
| <input type="checkbox"/> | <input type="checkbox"/> | <input type="checkbox"/> |
| <input type="checkbox"/> | <input type="checkbox"/> | <input type="checkbox"/> |
| <input type="checkbox"/> | <input type="checkbox"/> | <input type="checkbox"/> |

**SCORE:**

**Domain 8: Sexual function**

27. Does the patient have altered interest in sex?  
(Very much increased or decreased, please underline)
28. Does the patient have problems having sex?

|                          |                          |                          |
|--------------------------|--------------------------|--------------------------|
| <input type="checkbox"/> | <input type="checkbox"/> | <input type="checkbox"/> |
| <input type="checkbox"/> | <input type="checkbox"/> | <input type="checkbox"/> |

**SCORE:**

**Domain 9: Miscellaneous**

29. Does the patient suffer from pain not explained by other known conditions?  
(Is it related to intake of drugs and is it relieved by antiparkinson drugs?)
30. Does the patient report a change in ability to taste or smell?
31. Does the patient report a recent change in weight (not related to dieting)?
32. Does the patient experience excessive sweating? (not related to hot weather)

|                          |                          |                          |
|--------------------------|--------------------------|--------------------------|
| <input type="checkbox"/> | <input type="checkbox"/> | <input type="checkbox"/> |
| <input type="checkbox"/> | <input type="checkbox"/> | <input type="checkbox"/> |
| <input type="checkbox"/> | <input type="checkbox"/> | <input type="checkbox"/> |
| <input type="checkbox"/> | <input type="checkbox"/> | <input type="checkbox"/> |

**SCORE:**

**TOTAL SCORE:**

Bitte zeichnen Sie auf den beiden Bildern ein, wo Sie Schmerzen haben.

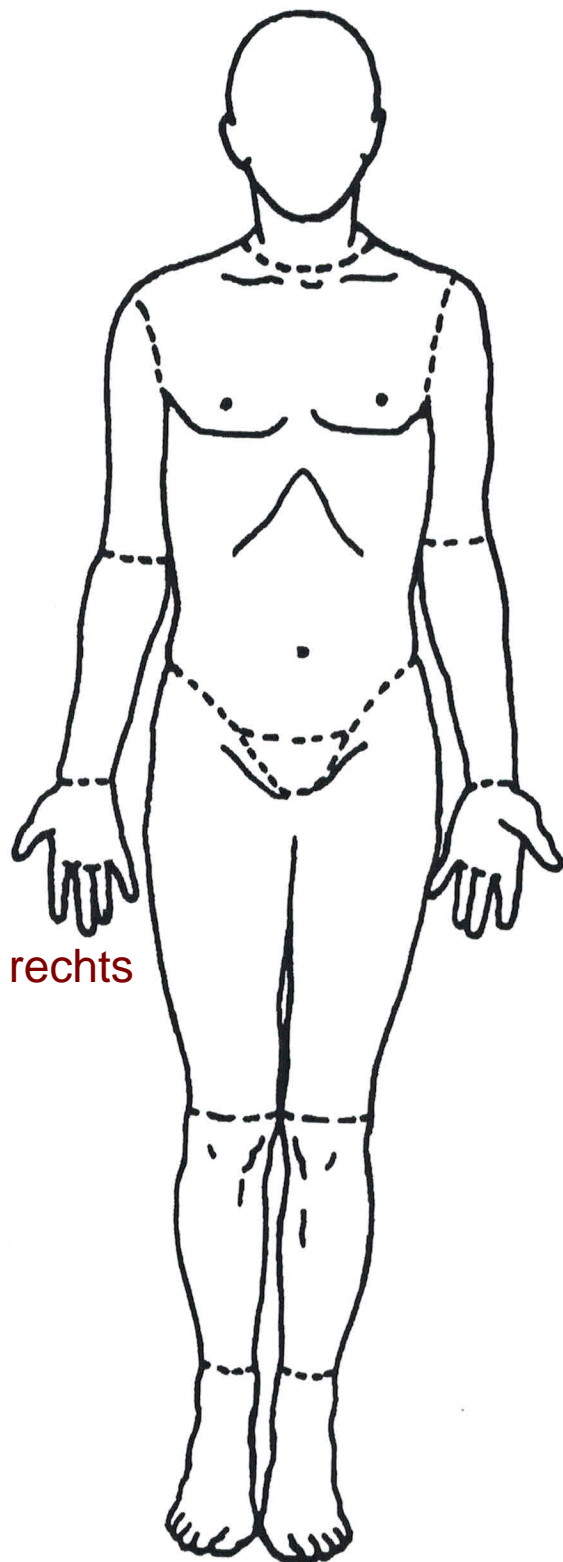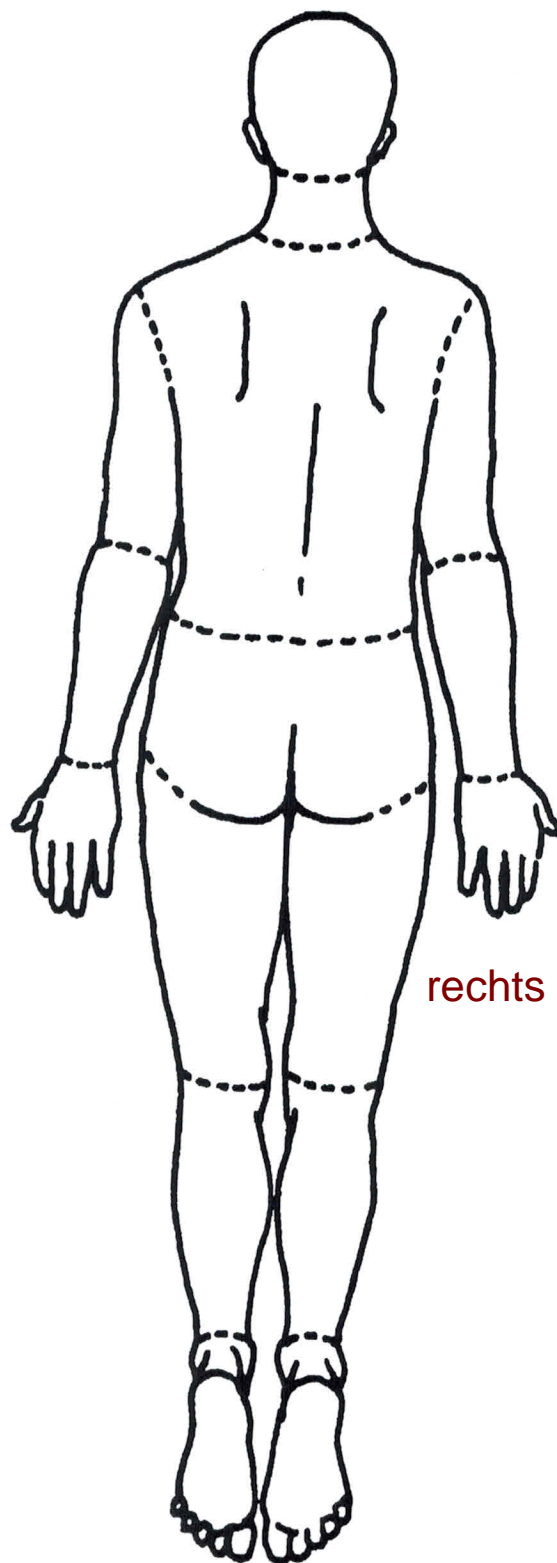

# 10 Edmonton Symptom Assessment System (ESAS)

(bitte machen Sie einen Kreis um die Zahl, die das Symptom am besten beschreibt)

|                               |                      |                                        |
|-------------------------------|----------------------|----------------------------------------|
| Kein Schmerz                  | 1 2 3 4 5 6 7 8 9 10 | Schlimmster möglicher Schmerz          |
| Keine Müdigkeit               | 1 2 3 4 5 6 7 8 9 10 | Schlimmste mögliche Müdigkeit          |
| Keine Übelkeit                | 1 2 3 4 5 6 7 8 9 10 | Schlimmste mögliche Übelkeit           |
| Keine Depression              | 1 2 3 4 5 6 7 8 9 10 | Schlimmste mögliche Depression         |
| Keine Ängstlichkeit           | 1 2 3 4 5 6 7 8 9 10 | Schlimmste mögliche Ängstlichkeit      |
| Keine Schläfrigkeit           | 1 2 3 4 5 6 7 8 9 10 | Schlimmste mögliche Schläfrigkeit      |
| Bester Appetit                | 1 2 3 4 5 6 7 8 9 10 | Schlechtest möglicher Appetit          |
| Bestes Wohlfühl /Behagen      | 1 2 3 4 5 6 7 8 9 10 | Schlechtest mögliches Wohlfühl/Behagen |
| Keine Atemnot                 | 1 2 3 4 5 6 7 8 9 10 | Schlimmste mögliche Atemnot            |
| Anderes Problem Ängstlichkeit | 1 2 3 4 5 6 7 8 9 10 |                                        |

Wer hat das Formular ausgefüllt (bitte nur eins ankreuzen)

- Patient
- Angehöriger
- Caregiver assisted

## Parkinson-Erkrankung Symptom Assessment

|                 |                            |                               |
|-----------------|----------------------------|-------------------------------|
| Keine Steifheit | <hr/> 1 2 3 4 5 6 7 8 9 10 | Schlimmste mögliche Steifheit |
|-----------------|----------------------------|-------------------------------|

|                   |                            |                                 |
|-------------------|----------------------------|---------------------------------|
| Keine Verstopfung | <hr/> 1 2 3 4 5 6 7 8 9 10 | Schlimmste mögliche Verstopfung |
|-------------------|----------------------------|---------------------------------|

|                               |                            |                                             |
|-------------------------------|----------------------------|---------------------------------------------|
| Keine Probleme beim Schlucken | <hr/> 1 2 3 4 5 6 7 8 9 10 | Schlimmste mögliche Probleme beim Schlucken |
|-------------------------------|----------------------------|---------------------------------------------|

|                    |                            |                                  |
|--------------------|----------------------------|----------------------------------|
| Keine Verwirrtheit | <hr/> 1 2 3 4 5 6 7 8 9 10 | Schlimmste mögliche Verwirrtheit |
|--------------------|----------------------------|----------------------------------|

## 11      Charlson Komorbiditäts-Index

| <b>Erkrankung</b>                                        | <b>Bewertung</b> | <b>Punkte</b> |
|----------------------------------------------------------|------------------|---------------|
| Herzinfarkt <sup>1</sup>                                 | 1                |               |
| Herzinsuffizienz <sup>2</sup>                            | 1                |               |
| periphere arterielle Verschlusskrankheit <sup>3</sup>    | 1                |               |
| cerebrovaskuläre Erkrankungen <sup>4</sup>               | 1                |               |
| Demenz <sup>5</sup>                                      | 1                |               |
| Chronische Lungenerkrankung <sup>6</sup>                 | 1                |               |
| Kollagenose <sup>7</sup>                                 | 1                |               |
| Ulkuskrankheit <sup>8</sup>                              | 1                |               |
| Leichte Lebererkrankung <sup>9</sup>                     | 1                |               |
| Diabetes mellitus (ohne Endorganschäden) <sup>10</sup>   | 1                |               |
| Hemiplegie                                               | 2                |               |
| Mäßig schwere und schwere Nierenerkrankung <sup>11</sup> | 2                |               |
| Diabetes mellitus mit Endorganschäden <sup>12</sup>      | 2                |               |
| Tumorerkrankung <sup>13</sup>                            | 2                |               |
| Leukämie <sup>14</sup>                                   | 2                |               |
| Lymphom <sup>15</sup>                                    | 2                |               |
| Mäßig schwere und schwere Lebererkrankung <sup>16</sup>  | 3                |               |
| Metastasierter solider Tumor                             | 6                |               |
| AIDS                                                     | 6                |               |
|                                                          |                  |               |
| <b>Summe</b>                                             |                  |               |

<sup>1</sup> Patienten mit Hospitalisierung wegen elektrokardiographisch und/oder enzymatisch nachgewiesenem Herzinfarkt

<sup>2</sup> Patienten mit nächtlicher oder durch Anstrengung induzierte Dyspnoe mit Besserung der Symptomatik unter Therapie

<sup>3</sup> Patienten mit claudicatio intermittens, nach peripherer Bypass-Versorgung, mit akutem arteriellem Verschluss oder Gangrän sowie nicht versorgtem abdominellen oder thorakalen Aortenaneurysma >6cm

<sup>4</sup> Patienten mit TIA oder Apoplex ohne schwerwiegenden Residuen

<sup>5</sup> Patienten mit chronischem kognitiven Defizit

<sup>6</sup> Patienten mit pulmonal bedingter Dyspnoe bei leichter oder mäßig schwerer Belastung ohne Therapie oder Patienten mit anfallsweiser Dyspnoe (Asthma)

<sup>7</sup> Polymyalgie rheumatica, Lupus erythematodes, schwere rheumatoide Arthritis, Polymyositis

<sup>8</sup> Patienten die bereits einmal wegen Ulcera behandelt wurden

<sup>9</sup> Leberzirrhose ohne portale Hypertonie

<sup>10</sup> Patienten mit Diab. mell. und medikamentöser Therapie

<sup>11</sup> Dialysepflichtigkeit oder Kreatinin >3mg/dl

<sup>12</sup> oder zurückliegender Krankenhausaufnahmen wegen hyperosmolarem Koma oder Ketoazidose

<sup>13</sup> Sämtliche solide Tumore ohne Metastasennachweis innerhalb der letzten fünf Jahre

<sup>14</sup> Akute und chronische Leukosen

<sup>15</sup> Hodgkin und Non-Hodgkin-Lymphome, multiples Myelom

<sup>16</sup> Leberzirrhose mit portaler Hypertonie ohne stattgehabte Blutung und Patienten mit Varizenblutung in der Anamnese
