# Supplementary material for: Resource Utilization of Patients with Parkinson’s Disease in the Late Stages of the Disease in Germany: Data from the CLaSP Study
Source: Springer Nature journal article supplement (doi:10.1007/s40273-021-01011-y), 2021-03-19
Supplement: MOESM6 [file 24131306]

**Versorgungssituation von Parkinson-Patienten in  
fortgeschrittenem Krankheitsstadium\***

**Fragebogen für Patienten**

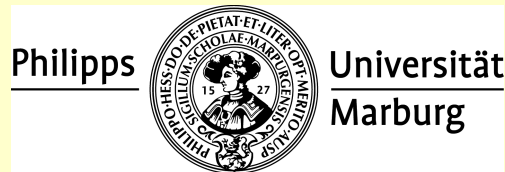

**Name des Patienten:** \_\_\_\_\_

**Adresse:** \_\_\_\_\_  
\_\_\_\_\_  
\_\_\_\_\_  
\_\_\_\_\_

**Geburtsdatum:** \_\_\_\_\_

**Patient ID:**

|                          |                          |                          |                          |                          |                          |
|--------------------------|--------------------------|--------------------------|--------------------------|--------------------------|--------------------------|
| <input type="checkbox"/> |
|--------------------------|--------------------------|--------------------------|--------------------------|--------------------------|--------------------------|

(\* dieses Projekt wird unterstützt durch das European Joint Program – Neurodegenerative Disease Research)

**DIESES DECKBLATT IST AUSSCHLIESSLICH ZUM  
VERBLEIB IM BEHANDELNDEN ZENTRUM BESTIMMT**





# 1 PERSÖNLICHE DATEN DES PATIENTEN

## 1.1 Geschlecht

Männlich

Weiblich

## 1.2 Geburtsdatum

\_\_\_\_ . 19 \_\_\_\_ ( Monat.Jahr)

## 1.3 Familienstand

verheiratet/Lebensgemeinschaft

geschieden/getrennt lebend

alleinstehend

verwitwet

## 1.4 Welchen Schulabschluss haben Sie (bitte geben Sie nur den am ehesten Zutreffenden an)?

keinen Schulabschluss

Volksschul-/Hauptschulabschluss

Realschulabschluss/Mittlere Reife

Fachhochschulreife

Allgemeine Hochschulreife/Abitur

anderer Schulabschluss: \_\_\_\_\_

## 1.5 Welche Berufsausbildung haben Sie abgeschlossen (bitte geben Sie nur die am ehesten Zutreffende an)?

keine Berufsausbildung

Lehre/Berufsausbildung (z.B. zum Gesellen)

Lehre und anschließend Meister

Hochschulstudium

Hochschulstudium und Promotion

andere Berufsausbildung: \_\_\_\_\_

**1.6 Wie ist ihr derzeitiges Beschäftigungsverhältnis (bitte kreuzen Sie nur das am ehesten Zutreffende an)?**

- Angestellte(r) Vollzeit
- Angestellte(r) Teilzeit, \_\_\_\_\_Stunden/Woche
- Arbeiter(in) Vollzeit
- Arbeiter(in) Teilzeit, \_\_\_\_\_ Stunden/Woche
- Selbständig
- Arbeitsunfähig aufgrund der Parkinson-Erkrankung, seit
- Arbeitsunfähig aus anderen Gründen, seit
- Arbeitslos aufgrund der Parkinson-Erkrankung, seit
- Arbeitslos aus anderen Gründen, seit
- Frührentner aufgrund der Parkinson-Erkrankung, seit
- Frührentner aus anderen Gründen, seit
- Altersrentner/Pensionär, seit
- keine Angabe

|                          |                          |                          |                          |
|--------------------------|--------------------------|--------------------------|--------------------------|
| <input type="checkbox"/> | <input type="checkbox"/> | <input type="checkbox"/> | <input type="checkbox"/> |
| <i>M</i>                 | <i>M</i>                 | <i>J</i>                 | <i>J</i>                 |
| <input type="checkbox"/> | <input type="checkbox"/> | <input type="checkbox"/> | <input type="checkbox"/> |
| <i>M</i>                 | <i>M</i>                 | <i>J</i>                 | <i>J</i>                 |
| <input type="checkbox"/> | <input type="checkbox"/> | <input type="checkbox"/> | <input type="checkbox"/> |
| <i>M</i>                 | <i>M</i>                 | <i>J</i>                 | <i>J</i>                 |
| <input type="checkbox"/> | <input type="checkbox"/> | <input type="checkbox"/> | <input type="checkbox"/> |
| <i>M</i>                 | <i>M</i>                 | <i>J</i>                 | <i>J</i>                 |
| <input type="checkbox"/> | <input type="checkbox"/> | <input type="checkbox"/> | <input type="checkbox"/> |
| <i>M</i>                 | <i>M</i>                 | <i>J</i>                 | <i>J</i>                 |
| <input type="checkbox"/> | <input type="checkbox"/> | <input type="checkbox"/> | <input type="checkbox"/> |
| <i>M</i>                 | <i>M</i>                 | <i>J</i>                 | <i>J</i>                 |

**1.7 Sind Sie während der letzten 3 Monate aufgrund der Parkinson-Erkrankung der Arbeit ferngeblieben?**

*WICHTIG: Wenn Sie stationär in einem Akutkrankenhaus behandelt wurden oder zur Kur, z. B. in einer stationären Rehabilitationsklinik waren, bitte zählen sie diese Tage nicht dazu!*

- Nein
- Ja      Anzahl der Tage: \*     in 3 Monaten

**Wichtig:\*** Bitte berücksichtigen Sie auch einzelne Stunden wie folgt:  
z.B. 4 Stunden = 0,5 Arbeitstage

- Keine Angabe

**1.8 Mussten Sie Ihre Arbeitssituation aufgrund der Parkinson-Erkrankung während der letzten 3 Monate verändern?**

- Nein
- Ja, ich musste aufhören zu arbeiten
- Ja, ich musste einen anderen Job annehmen
- Ja, ich musste meine Arbeitszeit von \_\_\_ Stunden/Woche auf \_\_\_ Stunden/Woche reduzieren, seit
- |                          |                          |                          |                          |
|--------------------------|--------------------------|--------------------------|--------------------------|
| <input type="checkbox"/> | <input type="checkbox"/> | <input type="checkbox"/> | <input type="checkbox"/> |
| <i>M</i>                 | <i>M</i>                 | <i>J</i>                 | <i>J</i>                 |
- Ja, ich musste einen anderen Job annehmen und meine Arbeitszeit von \_\_\_ Stunden/Woche auf \_\_\_ Stunden/Woche reduzieren, seit
- |                          |                          |                          |                          |
|--------------------------|--------------------------|--------------------------|--------------------------|
| <input type="checkbox"/> | <input type="checkbox"/> | <input type="checkbox"/> | <input type="checkbox"/> |
| <i>M</i>                 | <i>M</i>                 | <i>J</i>                 | <i>J</i>                 |
- Ja, ich musste mich einer Umschulung unterziehen

**1.9 Welche Art von Krankenversicherung haben Sie? Die Frage nach der Krankenversicherung bezieht sich nur auf Ihre Hauptversicherung, nicht jedoch auf Zusatzversicherungen.**

- Gesetzliche Krankenversicherung
- Private Krankenversicherung

**1.10 Sind Sie durch Ihre Pflegeversicherung einer Pflegestufe zugeteilt worden?**

- Nicht pflegebedürftig
- Keine Pflegestufe, aber pflegebedürftig
- Pflegestufe 0 seit \_\_ / \_\_ (MM / JJ)
- Pflegestufe 1 seit \_\_ / \_\_ (MM / JJ)
- Pflegestufe 2 seit \_\_ / \_\_ (MM / JJ)
- Pflegestufe 3 seit \_\_ / \_\_ (MM / JJ)

**1.11 Sind Sie von Zuzahlungen befreit (z.B. für Medikamente)?**

- Nein
- Ja

**1.12 Wird eine monatliche Pauschale für Demenzerkrankte durch die Pflegeversicherung gewährt ?**

- Nein
- Ja, 100 € / Monat
- Ja, 200 € / Monat

## 2 BEHANDLUNG DER PARKINSON-ERKRANKUNG

2.1 Wann begann die Parkinson-Erkrankung?

*J J J J*

2.2 Ist Ihr behandelnder Arzt für die Parkinson-Erkrankung ein Allgemeinarzt oder ein Neurologe?

- Allgemeinarzt  
 Neurologe  
 Unbekannt

2.3 Wie häufig haben Sie Ihren behandelnden Arzt während der letzten 3 Monate aufgrund der Parkinson-Erkrankung aufgesucht?

Anzahl der Arztbesuche

Arztbesuche

2.4 Haben Sie in den letzten 3 Monaten noch andere Ärzte/Spezialisten außer Ihrem behandelnden Arzt wegen Ihrer Parkinson-Erkrankung aufgesucht?

| Arzt / Spezialist                              | Anzahl der Besuche                                        |
|------------------------------------------------|-----------------------------------------------------------|
| <input type="checkbox"/> Allgemeinmediziner    | <input type="checkbox"/> <input type="checkbox"/> Besuche |
| <input type="checkbox"/> Neurologe             | <input type="checkbox"/> <input type="checkbox"/> Besuche |
| <input type="checkbox"/> Psychiater            | <input type="checkbox"/> <input type="checkbox"/> Besuche |
| <input type="checkbox"/> Geriater              | <input type="checkbox"/> <input type="checkbox"/> Besuche |
| <input type="checkbox"/> Internist             | <input type="checkbox"/> <input type="checkbox"/> Besuche |
| <input type="checkbox"/> Urologe               | <input type="checkbox"/> <input type="checkbox"/> Besuche |
| <input type="checkbox"/> Gynäkologe            | <input type="checkbox"/> <input type="checkbox"/> Besuche |
| <input type="checkbox"/> Hals-Nasen-Ohren-Arzt | <input type="checkbox"/> <input type="checkbox"/> Besuche |
| <input type="checkbox"/> Dermatologe           | <input type="checkbox"/> <input type="checkbox"/> Besuche |
| <input type="checkbox"/> Radiologe             | <input type="checkbox"/> <input type="checkbox"/> Besuche |
| <input type="checkbox"/> Psychologe            | <input type="checkbox"/> <input type="checkbox"/> Besuche |
| <input type="checkbox"/> Zahnarzt _____        | <input type="checkbox"/> <input type="checkbox"/> Besuche |
| <input type="checkbox"/> Spezialist für _____  | <input type="checkbox"/> <input type="checkbox"/> Besuche |
| <input type="checkbox"/> Spezialist für _____  | <input type="checkbox"/> <input type="checkbox"/> Besuche |
| <input type="checkbox"/> Spezialist für _____  | <input type="checkbox"/> <input type="checkbox"/> Besuche |

**2.5 Haben Sie in den letzten 3 Monaten weitere Therapien erhalten?**

| Therapie                                                    | Anzahl der Behandlungen                                        |
|-------------------------------------------------------------|----------------------------------------------------------------|
| <input type="checkbox"/> Physiotherapie                     | <input type="checkbox"/> <input type="checkbox"/> Behandlungen |
| <input type="checkbox"/> Massage                            | <input type="checkbox"/> <input type="checkbox"/> Behandlungen |
| <input type="checkbox"/> Ergotherapie/Bechäftigungstherapie | <input type="checkbox"/> <input type="checkbox"/> Behandlungen |
| <input type="checkbox"/> Logopädie                          | <input type="checkbox"/> <input type="checkbox"/> Behandlungen |
| <input type="checkbox"/> Sonstiges _____                    | <input type="checkbox"/> <input type="checkbox"/> Behandlungen |
| <input type="checkbox"/> Sonstiges _____                    | <input type="checkbox"/> <input type="checkbox"/> Behandlungen |
| <input type="checkbox"/> Sonstiges _____                    | <input type="checkbox"/> <input type="checkbox"/> Behandlungen |

**Ambulante Behandlung im Krankenhaus**

**2.6 Wurden Sie in den letzten 3 Monaten ambulant in einem Krankenhaus behandelt (ohne dort über Nacht zu bleiben) ?**

Nein

Ja Falls "ja", wie oft?  mal

Wegen der Parkinson-Erkrankung? Ja  Nein

**Stationäre Behandlung im Krankenhaus**

**2.7 Wurden Sie während der letzten 3 Monate als stationärer Patient im Krankenhaus behandelt (mindestens eine Übernachtung)?**

*Falls ja, geben Sie bitte den Grund und die Länge des Krankenhausaufenthaltes an.  
Bitte geben Sie ebenfalls die Station an, auf der Sie waren.*

| Grund des Krankenhausaufenthalts | Handelte es sich um einen Krankenhausaufenthalt aufgrund Ihrer Parkinson-Erkrankung? |      | Art der Station (z.B. Innere Abteilung) | Länge des Krankenhausaufenthalts                                   |  |
|----------------------------------|--------------------------------------------------------------------------------------|------|-----------------------------------------|--------------------------------------------------------------------|--|
|                                  | Ja                                                                                   | Nein |                                         | <i>Beispiel:</i><br><input type="text"/> <input type="text"/> Tage |  |
|                                  |                                                                                      |      |                                         |                                                                    |  |
|                                  |                                                                                      |      |                                         |                                                                    |  |
|                                  |                                                                                      |      |                                         |                                                                    |  |
|                                  |                                                                                      |      |                                         |                                                                    |  |



**2.8 Waren Sie innerhalb der letzten 3 Monate wegen Ihrer Parkinson-Erkrankung in einer Rehabilitationseinrichtung?**

Nein

Ja

*Falls "ja", wie viele Tage haben Sie stationär (mindestens eine Nacht) oder ambulant in einer Rehabilitationseinrichtung verbracht? Bitte zählen Sie sowohl den Aufnahmetag als auch den Entlassungstag als vollen Tag.*

|                 |                                     |
|-----------------|-------------------------------------|
| <b>Ambulant</b> | <b>Länge des Aufenthalts (Tage)</b> |
|-----------------|-------------------------------------|

Tage

|                  |                                     |
|------------------|-------------------------------------|
| <b>Stationär</b> | <b>Länge des Aufenthalts (Tage)</b> |
|------------------|-------------------------------------|

Tage

## 2.9 Einnahme von verordneten Medikamenten

Bitte ergänzen Sie in der nachstehenden Tabelle alle Arzneimittel, die Ihnen während der letzten 3 Monate verschrieben wurden. Bitte tragen Sie jeweils ein Medikament pro Kästchen ein.

| <b>Name des Medikaments</b><br>(siehe Packung) | <b>Dosis</b> | <b>Anzahl der<br/>Tabletten /<br/>Kapseln<br/>pro Tag</b> | <b>Dauer der Einnahme</b><br>(nehmen Sie das Medikament derzeit noch, kreuzen Sie bitte "fortlaufend" an, wurde es abgesetzt, geben Sie bitte das Datum der letzten Einnahme an) |
|------------------------------------------------|--------------|-----------------------------------------------------------|----------------------------------------------------------------------------------------------------------------------------------------------------------------------------------|
|                                                |              |                                                           | Einnahme seit:<br><input type="checkbox"/> <input type="checkbox"/> <input type="checkbox"/> <input type="checkbox"/><br>M M J J<br>Fortlaufend:<br><input type="checkbox"/>     |
|                                                |              |                                                           | Abgesetzt am:<br><input type="checkbox"/> <input type="checkbox"/> <input type="checkbox"/> <input type="checkbox"/><br>M M J J                                                  |
|                                                |              |                                                           | Einnahme seit:<br><input type="checkbox"/> <input type="checkbox"/> <input type="checkbox"/> <input type="checkbox"/><br>M M J J<br>Fortlaufend:<br><input type="checkbox"/>     |
|                                                |              |                                                           | Abgesetzt am:<br><input type="checkbox"/> <input type="checkbox"/> <input type="checkbox"/> <input type="checkbox"/><br>M M J J                                                  |
|                                                |              |                                                           | Einnahme seit:<br><input type="checkbox"/> <input type="checkbox"/> <input type="checkbox"/> <input type="checkbox"/><br>M M J J<br>Fortlaufend:<br><input type="checkbox"/>     |
|                                                |              |                                                           | Abgesetzt am:<br><input type="checkbox"/> <input type="checkbox"/> <input type="checkbox"/> <input type="checkbox"/><br>M M J J                                                  |
|                                                |              |                                                           | Einnahme seit:<br><input type="checkbox"/> <input type="checkbox"/> <input type="checkbox"/> <input type="checkbox"/><br>M M J J<br>Fortlaufend:<br><input type="checkbox"/>     |
|                                                |              |                                                           | Abgesetzt am:<br><input type="checkbox"/> <input type="checkbox"/> <input type="checkbox"/> <input type="checkbox"/><br>M M J J                                                  |
|                                                |              |                                                           | Einnahme seit:<br><input type="checkbox"/> <input type="checkbox"/> <input type="checkbox"/> <input type="checkbox"/><br>M M J J<br>Fortlaufend:<br><input type="checkbox"/>     |
|                                                |              |                                                           | Abgesetzt am:<br><input type="checkbox"/> <input type="checkbox"/> <input type="checkbox"/> <input type="checkbox"/><br>M M J J                                                  |
|                                                |              |                                                           | Einnahme seit:<br><input type="checkbox"/> <input type="checkbox"/> <input type="checkbox"/> <input type="checkbox"/><br>M M J J<br>Fortlaufend:<br><input type="checkbox"/>     |
|                                                |              |                                                           | Abgesetzt am:<br><input type="checkbox"/> <input type="checkbox"/> <input type="checkbox"/> <input type="checkbox"/><br>M M J J                                                  |

**2.10 Haben Sie in den letzten 3 Monaten Medikamente zur Behandlung Ihrer Parkinson-Erkrankung ohne Rezept gekauft und eingenommen?**

(Gemeint sind Medikamente, die Ihnen Ihr Arzt nicht verschrieben hat und die Sie selbst bezahlt haben. Bitte geben Sie *alle Substanzen an*, auch solche Medikamente wie Vitamine, pflanzliche Heilmittel usw. die Sie zur Behandlung Ihrer **Parkinson-Erkrankung** gekauft haben.)

| Name des Medikaments |
|----------------------|
|----------------------|

---

---

---

---

---

---

---

---

---

---

**2.11 Haben Sie innerhalb der letzten 3 Monate eines oder mehrere der in der nachfolgenden Liste aufgeführten Hilfsmittel erhalten (Mehrfachangaben sind möglich)?**

Falls „Ja“, bitte geben sie die Anzahl der Hilfsmittel und die von Ihnen geleisteten Zuzahlungen an, sofern Ihnen diese bekannt sind.

| <u>Hilfsmittel</u>    | <u>Anzahl</u>            | <u>Zuzahlung</u><br><i>in Euro</i> | <u>Zuzahlung unbekannt</u> |
|-----------------------|--------------------------|------------------------------------|----------------------------|
| Gehstütze/Krücke      | <input type="checkbox"/> | _____ €                            | <input type="checkbox"/>   |
| Gehwagen/Rollator     | <input type="checkbox"/> | _____ €                            | <input type="checkbox"/>   |
| Rollstuhl             | <input type="checkbox"/> | _____ €                            | <input type="checkbox"/>   |
| Spezialbett           | <input type="checkbox"/> | _____ €                            | <input type="checkbox"/>   |
| Treppenlift           | <input type="checkbox"/> | _____ €                            | <input type="checkbox"/>   |
| Toilettensitzerhöhung | <input type="checkbox"/> | _____ €                            | <input type="checkbox"/>   |
| Inkontinenzeinlagen   | <input type="checkbox"/> | _____ €                            | <input type="checkbox"/>   |
| Kathetermaterial      | <input type="checkbox"/> | _____ €                            | <input type="checkbox"/>   |
| Sonstige_____         | <input type="checkbox"/> | _____ €                            | <input type="checkbox"/>   |
| Sonstige_____         | <input type="checkbox"/> | _____ €                            | <input type="checkbox"/>   |

Nein, ich habe während der letzten 3 Monate keine Hilfsmittel erhalten



### 3 Gesundheitsbezogene Lebensqualität – EQ-5D mit Visueller Analogskala

Bitte geben Sie an, welche Aussagen Ihren heutigen Gesundheitszustand am besten beschreiben, indem Sie ein Kreuz (☒) in ein Kästchen jeder Gruppe machen.

#### **Beweglichkeit/Mobilität**

- Ich habe keine Probleme herumzugehen
- Ich habe einige Probleme herumzugehen
- Ich bin ans Bett gebunden

#### **Für sich selbst sorgen**

- Ich habe keine Probleme, für mich selbst zu sorgen
- Ich habe einige Probleme, mich selbst zu waschen oder mich anzuziehen
- Ich bin nicht in der Lage, mich selbst zu waschen oder anzuziehen

#### **Allgemeine Tätigkeiten** (z.B. Arbeit, Studium, Hausarbeit, Familien- oder Freizeitaktivitäten)

- Ich habe keine Probleme, meinen alltäglichen Tätigkeiten nachzugehen
- Ich habe einige Probleme, meinen alltäglichen Tätigkeiten nachzugehen
- Ich bin nicht in der Lage, meinen alltäglichen Tätigkeiten nachzugehen

#### **Schmerzen/Körperliche Beschwerden**

- Ich habe keine Schmerzen oder Beschwerden
- Ich habe mäßige Schmerzen oder Beschwerden
- Ich habe extreme Schmerzen oder Beschwerden

#### **Angst/Niedergeschlagenheit**

- Ich bin nicht ängstlich oder deprimiert
- Ich bin mäßig ängstlich oder deprimiert
- Ich bin extrem ängstlich oder deprimiert

Um Sie bei der Einschätzung, wie gut oder wie schlecht Ihr Gesundheitszustand ist, zu unterstützen, haben wir eine Skala gezeichnet, ähnlich einem Thermometer. Der denkbar beste Gesundheitszustand ist mit einer "100" gekennzeichnet, der schlechteste mit "0".

**Wir möchten Sie nun bitten, auf dieser Skala zu kennzeichnen, wie gut oder schlecht Ihrer Ansicht nach Ihr persönlicher Gesundheitszustand heute ist. Bitte verbinden Sie dazu den untenstehenden Kasten mit dem Punkt auf der Skala, der Ihren heutigen Gesundheitszustand am besten wiedergibt.**

**Ihr  
heutiger  
Gesundheitszustand**

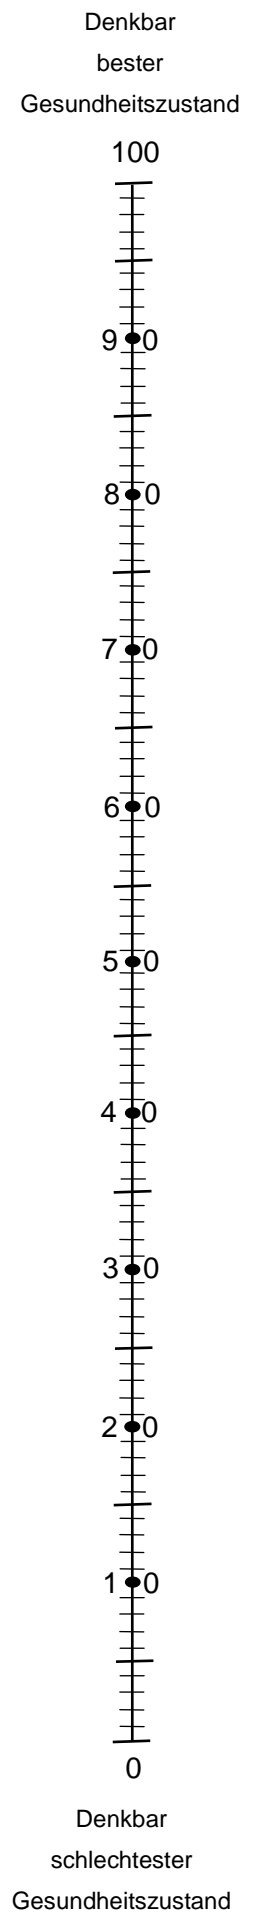

#### 4 Parkinson's Disease Questionnaire – PDQ-8

Bitte geben Sie an, welche der unten aufgeführten Aussagen am besten zutreffen, indem Sie ein Kreuz (☒) in ein Kästchen jeder Gruppe machen.

| <b>Parkinson's Disease Questionnaire</b>                                          | Niemals               | Selten                | Manch-<br>mal         | Häufig                | Immer<br>oder<br>„kann ich<br>überhaupt<br>nicht“ |
|-----------------------------------------------------------------------------------|-----------------------|-----------------------|-----------------------|-----------------------|---------------------------------------------------|
| <b>Wie oft haben Sie im letzten Monat wegen ihrer Parkinson- Erkrankung ...</b>   |                       |                       |                       |                       |                                                   |
| ... Probleme gehabt, sich in der Öffentlichkeit zu bewegen?                       | <input type="radio"/>                             |
| ... Schwierigkeiten gehabt, sich selbst anzuziehen?                               | <input type="radio"/>                             |
| ... sich niedergeschlagen oder deprimiert gefühlt?                                | <input type="radio"/>                             |
| ... Probleme im Verhältnis mit Ihnen nahe stehenden Personen gehabt?              | <input type="radio"/>                             |
| ... Probleme gehabt, sich zu konzentrieren (z.B. beim Lesen oder beim Fernsehen)? | <input type="radio"/>                             |
| ... sich außer Stande gefühlt, mit anderen richtig zu kommunizieren?              | <input type="radio"/>                             |
| ... schmerzhafte Muskelkrämpfe gehabt?                                            | <input type="radio"/>                             |
| ... sich in der Öffentlichkeit wegen ihrer Parkinson- Erkrankung geschämt?        | <input type="radio"/>                             |



Die Frage nach dem **Sinn des Lebens** bewegt viele Menschen. In den verschiedensten Lebenssituationen stellen sich Menschen diese Frage. Dies können besondere Glücksmomente sein, aber auch leidvolle Erfahrungen.

Im folgenden interessiert uns, **was Ihrem Leben Sinn gibt**. Darunter verstehen wir Bereiche, die einem wichtig sind, Halt geben und dem Leben Bedeutung verleihen.

Diese **Bereiche** sind für jede Person unterschiedlich, es gibt daher keine „richtigen“ oder „falschen“ Antworten. Bitte beantworten Sie die Fragen einfach so offen und ehrlich wie möglich. Beziehen Sie sich auf Ihre gegenwärtige Lebenssituation.

**Bitte nennen Sie 3 bis 7 Bereiche, die ihrem Leben Sinn geben, unabhängig davon wie zufrieden oder unzufrieden Sie momentan mit diesen Bereichen sind.**  
Die Reihenfolge der Nennung spielt keine Rolle.

**Bereich 1:** \_\_\_\_\_

**Bereich 2:** \_\_\_\_\_

**Bereich 3:** \_\_\_\_\_

**Bereich 4:** \_\_\_\_\_

**Bereich 5:** \_\_\_\_\_

**Bereich 6:** \_\_\_\_\_

**Bereich 7:** \_\_\_\_\_

Bitte achten Sie bei den folgenden Antworten darauf, dass die Nummerierung der Bereiche mit der Reihenfolge auf der vorigen Seite übereinstimmt. Bitte bewerten Sie jeden der von Ihnen genannten Bereiche! Beziehen Sie sich in Ihrer Einschätzung auf Ihre **gegenwärtige Lebenssituation**.

Bitte kreuzen Sie an, wie **zufrieden bzw. unzufrieden** Sie in den einzelnen Bereichen sind, d.h. wie sehr sich der jeweilige Bereich positiv oder negativ auf Ihren Lebenssinn auswirkt.

| Wie zufrieden sind Sie mit ... | Sehr unzufrieden         |                          |                          | Weder noch              | Sehr zufrieden           |                          |                          |
|--------------------------------|--------------------------|--------------------------|--------------------------|-------------------------|--------------------------|--------------------------|--------------------------|
| <b>Bereich 1</b>               | <input type="radio"/> -3 | <input type="radio"/> -2 | <input type="radio"/> -1 | <input type="radio"/> 0 | <input type="radio"/> +1 | <input type="radio"/> +2 | <input type="radio"/> +3 |
| <b>Bereich 2</b>               | <input type="radio"/> -3 | <input type="radio"/> -2 | <input type="radio"/> -1 | <input type="radio"/> 0 | <input type="radio"/> +1 | <input type="radio"/> +2 | <input type="radio"/> +3 |
| <b>Bereich 3</b>               | <input type="radio"/> -3 | <input type="radio"/> -2 | <input type="radio"/> -1 | <input type="radio"/> 0 | <input type="radio"/> +1 | <input type="radio"/> +2 | <input type="radio"/> +3 |
| <b>Bereich 4</b>               | <input type="radio"/> -3 | <input type="radio"/> -2 | <input type="radio"/> -1 | <input type="radio"/> 0 | <input type="radio"/> +1 | <input type="radio"/> +2 | <input type="radio"/> +3 |
| <b>Bereich 5</b>               | <input type="radio"/> -3 | <input type="radio"/> -2 | <input type="radio"/> -1 | <input type="radio"/> 0 | <input type="radio"/> +1 | <input type="radio"/> +2 | <input type="radio"/> +3 |
| <b>Bereich 6</b>               | <input type="radio"/> -3 | <input type="radio"/> -2 | <input type="radio"/> -1 | <input type="radio"/> 0 | <input type="radio"/> +1 | <input type="radio"/> +2 | <input type="radio"/> +3 |
| <b>Bereich 7</b>               | <input type="radio"/> -3 | <input type="radio"/> -2 | <input type="radio"/> -1 | <input type="radio"/> 0 | <input type="radio"/> +1 | <input type="radio"/> +2 | <input type="radio"/> +3 |

Bitte kreuzen Sie an, wie **wichtig** jeder einzelne Bereich für Ihren Lebenssinn insgesamt ist. Versuchen Sie, so deutlich wie möglich zwischen den Bereichen zu unterscheiden, indem Sie alle Ziffern erwägen.

| Wie wichtig ist für Sie ... | Nicht wichtig           |                         | Wichtig                 |                         |                         | Sehr wichtig            | Äußerst wichtig         |                         |
|-----------------------------|-------------------------|-------------------------|-------------------------|-------------------------|-------------------------|-------------------------|-------------------------|-------------------------|
| <b>Bereich 1</b>            | <input type="radio"/> 0 | <input type="radio"/> 1 | <input type="radio"/> 2 | <input type="radio"/> 3 | <input type="radio"/> 4 | <input type="radio"/> 5 | <input type="radio"/> 6 | <input type="radio"/> 7 |
| <b>Bereich 2</b>            | <input type="radio"/> 0 | <input type="radio"/> 1 | <input type="radio"/> 2 | <input type="radio"/> 3 | <input type="radio"/> 4 | <input type="radio"/> 5 | <input type="radio"/> 6 | <input type="radio"/> 7 |
| <b>Bereich 3</b>            | <input type="radio"/> 0 | <input type="radio"/> 1 | <input type="radio"/> 2 | <input type="radio"/> 3 | <input type="radio"/> 4 | <input type="radio"/> 5 | <input type="radio"/> 6 | <input type="radio"/> 7 |
| <b>Bereich 4</b>            | <input type="radio"/> 0 | <input type="radio"/> 1 | <input type="radio"/> 2 | <input type="radio"/> 3 | <input type="radio"/> 4 | <input type="radio"/> 5 | <input type="radio"/> 6 | <input type="radio"/> 7 |
| <b>Bereich 5</b>            | <input type="radio"/> 0 | <input type="radio"/> 1 | <input type="radio"/> 2 | <input type="radio"/> 3 | <input type="radio"/> 4 | <input type="radio"/> 5 | <input type="radio"/> 6 | <input type="radio"/> 7 |
| <b>Bereich 6</b>            | <input type="radio"/> 0 | <input type="radio"/> 1 | <input type="radio"/> 2 | <input type="radio"/> 3 | <input type="radio"/> 4 | <input type="radio"/> 5 | <input type="radio"/> 6 | <input type="radio"/> 7 |
| <b>Bereich 7</b>            | <input type="radio"/> 0 | <input type="radio"/> 1 | <input type="radio"/> 2 | <input type="radio"/> 3 | <input type="radio"/> 4 | <input type="radio"/> 5 | <input type="radio"/> 6 | <input type="radio"/> 7 |

## 6 Zufriedenheit mit der Versorgung

Wie zufrieden sind Sie im Großen und Ganzen mit Ihrer Pflege?

Bitte markieren Sie auf der nebenstehenden Skala, wie gut oder wie schlecht Sie im Großen und Ganzen Ihre Pflege einschätzen. Bitte machen Sie dafür ein Kreuz auf der Linie.

Sehr zufrieden mit der Pflege insgesamt

100

90

80

70

60

50

40

30

20

10

0

Sehr unzufrieden mit der Pflege insgesamt

## 7 Geriatric Depression Scale

|    |                                                                                                     |      |      |
|----|-----------------------------------------------------------------------------------------------------|------|------|
| 1  | Sind Sie im wesentlichen mit Ihrem Leben zufrieden?                                                 | Nein | Ja   |
| 2  | Haben Sie viele Ihrer Interessen oder Aktivitäten aufgegeben?                                       | Ja   | Nein |
| 3  | Haben Sie das Gefühl, dass Ihr Leben leer ist?                                                      | Ja   | Nein |
| 4  | Sind Sie oft gelangweilt?                                                                           | Ja   | Nein |
| 5  | Schauen Sie zuversichtlich in die Zukunft?                                                          | Nein | Ja   |
| 6  | Machen Ihnen Gedanken zu schaffen, die Ihnen nicht aus dem Kopf wollen?                             | Ja   | Nein |
| 7  | Haben Sie meistens gute Laune?                                                                      | Nein | Ja   |
| 8  | Sind Sie besorgt darüber, dass Ihnen etwas Schlimmes zustoßen könnte?                               | Ja   | Nein |
| 9  | Fühlen Sie sich die meiste Zeit glücklich?                                                          | Nein | Ja   |
| 10 | Fühlen Sie sich oft hilflos?                                                                        | Ja   | Nein |
| 11 | Sind Sie oft unruhig und nervös?                                                                    | Ja   | Nein |
| 12 | Ziehen Sie es vor, Zuhause zu bleiben, anstatt auszugehen und sich mit etwas Neuem zu beschäftigen? | Ja   | Nein |
| 13 | Machen Sie sich oft Sorgen um die Zukunft?                                                          | Ja   | Nein |
| 14 | Haben Sie den Eindruck, mit dem Gedächtnis in letzter Zeit mehr als sonst Probleme zu haben?        | Ja   | Nein |
| 15 | Finden Sie es schön, jetzt in dieser Zeit zu leben?                                                 | Nein | Ja   |
| 16 | Fühlen Sie sich oft niedergeschlagen und bedrückt?                                                  | Ja   | Nein |
| 17 | Fühlen Sie sich, so wie Sie im Augenblick sind, wertlos?                                            | Ja   | Nein |
| 18 | Machen Sie sich viele Gedanken über die Vergangenheit?                                              | Ja   | Nein |
| 19 | Finden Sie das Leben sehr aufregend?                                                                | Nein | Ja   |
| 20 | Bereitet es Ihnen Mühe, neue Aufgaben zu beginnen?                                                  | Ja   | Nein |
| 21 | Fühlen Sie sich voller Energie?                                                                     | Nein | Ja   |
| 22 | Haben Sie das Gefühl, dass Ihre Situation hoffnungslos ist?                                         | Ja   | Nein |
| 23 | Haben Sie den Eindruck dass es den meisten Menschen besser geht als Ihnen?                          | Ja   | Nein |
| 24 | Regen Sie sich oft über Kleinigkeiten auf?                                                          | Ja   | Nein |
| 25 | Ist Ihnen oft nach Weinen zu Mute?                                                                  | Ja   | Nein |
| 26 | Haben Sie Schwierigkeiten, sich zu konzentrieren?                                                   | Ja   | Nein |
| 27 | Freuen Sie sich darauf, morgens aufzustehen?                                                        | Nein | Ja   |
| 28 | Vermeiden Sie gesellige Zusammenkünfte?                                                             | Ja   | Nein |
| 29 | Ist es für Sie einfach, Entscheidungen zu treffen?                                                  | Nein | Ja   |
| 30 | Konnten Sie in der letzten Woche klare Gedanken fassen?                                             | Nein | Ja   |

**Herzlichen Dank für Ihre Mühe, Sie haben  
es geschafft!**

Bitte überprüfen Sie nochmal ob Sie alle  
Fragen beantwortet haben!

**Vielen Dank!**
