# Supplementary material for: Resource Utilization of Patients with Parkinson’s Disease in the Late Stages of the Disease in Germany: Data from the CLaSP Study
Source: Springer Nature journal article supplement (doi:10.1007/s40273-021-01011-y), 2021-03-19
Supplement: MOESM7 [file 24131306]

**Versorgungssituation von Parkinson-Patienten in  
fortgeschrittenem Krankheitsstadium\***

**Fragebogen für Angehörige**

Philipps

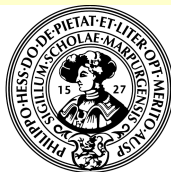

Universität  
Marburg

Angehörigen ID:

-ANG

(\* dieses Projekt wird unterstützt durch das European Joint Program – Neurodegenerative Disease Research)

**DIESES DECKBLATT IST AUSSCHLIESSLICH ZUM  
VERBLEIB IM BEHANDELNDEN ZENTRUM BESTIMMT**





# 1 PERSÖNLICHE DATEN DES ANGEHÖRIGEN

## 1.1 Geschlecht

Männlich

Weiblich

## 1.2 Geburtsdatum

\_\_\_\_ . 19 \_\_\_\_ ( Monat.Jahr)

## 1.3 Familienstand

verheiratet/Lebensgemeinschaft

geschieden/getrennt lebend

alleinstehend

verwitwet

## 1.4 Welchen Schulabschluss haben Sie (bitte geben Sie nur den am ehesten Zutreffenden an)?

keinen Schulabschluss

Volksschul-/Hauptschulabschluss

Realschulabschluss/Mittlere Reife

Fachhochschulreife

Allgemeine Hochschulreife/Abitur

anderer Schulabschluss: \_\_\_\_\_

## 1.5 Welche Berufsausbildung haben Sie abgeschlossen (bitte geben Sie nur die am ehesten Zutreffende an)?

keine Berufsausbildung

Lehre/Berufsausbildung (z.B. zum Gesellen)

Lehre und anschließend Meister

Hochschulstudium

Hochschulstudium und Promotion

andere Berufsausbildung: \_\_\_\_\_

**1.6 In welchem Verhältnis stehen Sie zur Patientin / zum Patienten?**

- Ehepartner seit \_\_\_\_ (JJJJ)
- Lebenspartner seit \_\_\_\_ (JJJJ)
- Tochter
- Sohn
- Schwiegertochter
- Schwiegersohn
- Freund/Bekannter
- Anderes Verhältnis, nämlich \_\_\_\_\_

**1.7 Wie ist ihr derzeitiges Beschäftigungsverhältnis (bitte nur das am ehesten Zutreffende kreuzen)?**

- Angestellte(r) Vollzeit
- Angestellte(r) Teilzeit, \_\_\_\_\_ Stunden/Woche
- Arbeiter(in) Vollzeit
- Arbeiter(in) Teilzeit, \_\_\_\_\_ Stunden/Woche
- Selbständig

- |                                                                                                      |                          |                          |                          |                          |
|------------------------------------------------------------------------------------------------------|--------------------------|--------------------------|--------------------------|--------------------------|
| <input type="checkbox"/> Arbeitsunfähig aufgrund der Parkinson-Erkrankung des/der Patienten/in, seit | <input type="checkbox"/> | <input type="checkbox"/> | <input type="checkbox"/> | <input type="checkbox"/> |
|                                                                                                      | <i>M</i>                 | <i>M</i>                 | <i>J</i>                 | <i>J</i>                 |
| <input type="checkbox"/> Arbeitsunfähig aus anderen Gründen, seit                                    | <input type="checkbox"/> | <input type="checkbox"/> | <input type="checkbox"/> | <input type="checkbox"/> |
|                                                                                                      | <i>M</i>                 | <i>M</i>                 | <i>J</i>                 | <i>J</i>                 |
| <input type="checkbox"/> Arbeitslos aufgrund der Parkinson-Erkrankung des/der Patienten/in, seit     | <input type="checkbox"/> | <input type="checkbox"/> | <input type="checkbox"/> | <input type="checkbox"/> |
|                                                                                                      | <i>M</i>                 | <i>M</i>                 | <i>J</i>                 | <i>J</i>                 |
| <input type="checkbox"/> Arbeitslos aus anderen Gründen, seit                                        | <input type="checkbox"/> | <input type="checkbox"/> | <input type="checkbox"/> | <input type="checkbox"/> |
|                                                                                                      | <i>M</i>                 | <i>M</i>                 | <i>J</i>                 | <i>J</i>                 |
| <input type="checkbox"/> Frührentner aufgrund der Parkinson-Erkrankung des/der Patienten/in, seit    | <input type="checkbox"/> | <input type="checkbox"/> | <input type="checkbox"/> | <input type="checkbox"/> |
|                                                                                                      | <i>M</i>                 | <i>M</i>                 | <i>J</i>                 | <i>J</i>                 |
| <input type="checkbox"/> Frührentner aus anderen Gründen, seit                                       | <input type="checkbox"/> | <input type="checkbox"/> | <input type="checkbox"/> | <input type="checkbox"/> |
|                                                                                                      | <i>M</i>                 | <i>M</i>                 | <i>J</i>                 | <i>J</i>                 |
| <input type="checkbox"/> Altersrentner/Pensionär, seit                                               | <input type="checkbox"/> | <input type="checkbox"/> | <input type="checkbox"/> | <input type="checkbox"/> |
|                                                                                                      | <i>M</i>                 | <i>M</i>                 | <i>J</i>                 | <i>J</i>                 |
| <input type="checkbox"/> keine Angabe                                                                |                          |                          |                          |                          |

**1.8 Sind Sie während der letzten 3 Monate aufgrund der Parkinson-Erkrankung des/der Patienten/in der Arbeit ferngeblieben?**

*WICHTIG: Wenn sie stationär in einem Akutkrankenhaus behandelt wurden oder zur Kur, z. B. in einer stationären Rehabilitationsklinik waren, bitte zählen sie diese Tage nicht dazu!*

Nein

Ja Anzahl der Tage: \*  in 3 Monaten

**Wichtig:**\* Bitte berücksichtigen Sie auch einzelne Stunden wie folgt:  
z.B. 4 Stunden = 0,5 Arbeitstage

Keine Angabe

**1.9 Mussten Sie Ihre Arbeitssituation aufgrund der Parkinson-Erkrankung des/der Patienten/in während der letzten 3 Monate verändern?**

Nein

Ja, ich musste aufhören zu arbeiten

Ja, ich musste einen anderen Job annehmen

Ja, ich musste meine Arbeitszeit von \_\_\_ Stunden/Woche auf \_\_\_ Stunden/Woche reduzieren, seit      
M M J J

Ja, ich musste einen anderen Job annehmen und meine Arbeitszeit von \_\_\_ Stunden/Woche auf \_\_\_ Stunden/Woche reduzieren, seit      
M M J J

Ja, ich musste mich einer Umschulung unterziehen

## 2 WOHN- UND VERSORGUNGSSITUATION DES PATIENTEN

**2.1 Bitte geben Sie die aktuelle Wohnsituation der Patientin / des Patienten an:**

Eigenes Zuhause

Vorübergehende Wohnform (z.B. Kurzzeitpflege oder Verhinderungspflege) seit \_\_ / \_\_ (MM / JJ)

Betreutes Wohnen (z.B. Wohngruppe) seit \_\_ / \_\_ (MM / JJ)

Alten-/Pflegeheim seit \_\_ / \_\_ (MM / JJ)

Andere Wohnform \_\_\_\_\_

**2.2 Falls der die Patientin / der Patient in ihrem / seinem eigenen Zuhause wohnt, wie viele Personen leben ständig im Haushalt der Patientin / des Patienten, sie / ihn selbst eingeschlossen? Denken Sie dabei bitte auch an im Haushalt lebende Kinder.**

Person(en)

**2.3 Leben Sie mit der Patientin / dem Patienten in einem gemeinsamen Haushalt?**

Ja (Falls "Ja", bitte fahren Sie mit Frage 2.7 fort)

Nein

**2.4 Wenn Sie nicht mit der Patientin / dem Patienten in einem gemeinsamen Haushalt leben:  
Wie oft besuchen Sie die Patientin / den Patienten?**

mehrmals täglich

täglich

mind. 1 mal pro Woche

mind. 1 mal pro Monat

seltener als 1 mal pro Monat

**2.5 Wenn Sie nicht mit der Patientin / dem Patienten in einem gemeinsamen Haushalt leben:  
Wie oft telefonieren Sie mit der Patientin / dem Patienten?**

mehrmals täglich

täglich

mind. 1 mal pro Woche

mind. 1 mal pro Monat

seltener als 1 mal pro Monat

nie

**2.6 Wenn Sie nicht mit der Patientin / dem Patienten in einem gemeinsamen Haushalt leben:  
Wie lange haben Sie pro Woche Kontakt (Telefon und/oder persönlich) zu Ihrem  
Angehörigen?**

weniger als 1 Stunde

weniger als 5 Stunden

5 bis 10 Stunden

10 bis 24 Stunden

mehr als 24 Stunden

**2.7 Benötigt die Patientin / der Patient bei der Erledigung von Alltagsaktivitäten (z.B.  
Waschen, Anziehen, Nahrungszubereitung) Unterstützung durch andere?**

Nein

Ja (falls "Ja", bitte beantworten Sie die nachfolgenden Fragen)

**2.8 Falls die Patientin / der Patient bei der Erledigung von Alltagsaktivitäten Unterstützung benötigt, bitte geben Sie an, welche Pflegeleistungen sie / er benötigt (Mehrfachangaben möglich)?**

- Hilfe beim An- und Ausziehen
- Hilfe bei der Körperpflege (Waschen, Toilettengang)
- Hilfe bei der Zubereitung von Mahlzeiten
- Hilfe beim Essen
- Hilfe beim Stellen/Vorbereiten und der Einnahme von Medikamenten
- Hilfe bei der Haushaltsarbeit (Waschen, Putzen, Einkaufen etc.)
- Hilfe bei der Mobilität innerhalb und außerhalb der Wohnung
- Sonstige \_\_\_\_\_

**2.9 Falls die Patientin / der Patient in ihrem / seinem eigenen Zuhause lebt und Pflege benötigt, bitte geben Sie an, welche Art von Pflege sie / er während der letzten 3 Monate erhalten hat?**

- Nicht-professionelle Pflege (z.B. durch die Familie, Freunde, Bekannte etc.) seit \_\_ / \_\_ (MM / JJ)
- Professionelle ambulante Pflege durch Pflegedienste seit \_\_ / \_\_ (MM / JJ)  
Wie viele Stunden pro Woche erhält er / sie professionelle Pflege \_\_\_\_\_ Stunden / Woche
- Finanzielle Unterstützung zur Verbesserung des Wohnumfelds \_\_\_\_\_ Euro (keine Cents)

**3 FRAGEBOGEN ZUM ZEITAUFWAND VON BETREUERN/PFLEGENDEN**

**3.1 Gibt es außer Ihnen noch weitere Personen, die den Patienten / die Patientin pflegen bzw. betreuen?**

- Ja
- Nein

**3.2 Falls ja, wie hoch ist der Prozentsatz Ihres Beitrags unter allen Betreuern?**

- < 20%
- 20 - 40%
- 41 - 60%
- 61 - 80%
- > 80%



3.3 Wie viel Zeit haben Sie im letzten Monat normalerweise pro Pfl egetag darauf verwendet, um der Patientin / dem Patienten bei persönlichen Aufgaben wie Toilettengang, Essen, Ankleiden, Körperpflege, Gehen und Baden zu helfen?

Insgesamt  Stunden und  Minuten pro Tag

3.4 An wie vielen Tagen im letzten Monat haben Sie diese Dienste für die Patientin / den Patienten geleistet?

Tage

3.5 Wie viel Zeit haben Sie im letzten Monat normalerweise pro Pfl egetag darauf verwendet, die Patientin / den Patienten zu "beaufsichtigen"?

Insgesamt  Stunden und  Minuten pro Tag

3.6 Bitte geben Sie für die unten aufgeführten Pflegeleistungen an, für wie viele Tage der Patient die entsprechende Leistung während der letzten 3 Monate erhalten hat (Mehrfachnennungen sind möglich)?

- |                                              |          |
|----------------------------------------------|----------|
| <input type="checkbox"/> Tagespflege         | ___ Tage |
| <input type="checkbox"/> Nachtpflege         | ___ Tage |
| <input type="checkbox"/> Kurzzeitpflege      | ___ Tage |
| <input type="checkbox"/> Verhinderungspflege | ___ Tage |

3.7 Bitte geben Sie an, wie häufig die folgenden Serviceleistung während der letzten 3 Monate in Anspruch genommen wurden (Mehrfachnennungen sind möglich)?

- |                                                                                           |         |
|-------------------------------------------------------------------------------------------|---------|
| <input type="checkbox"/> „Essen auf Rädern“ / Nahrungsmittellieferungen durch Supermärkte | ___ mal |
| <input type="checkbox"/> Transportdienste (z.B. zu Pflegeeinrichtungen)                   | ___ mal |
| <input type="checkbox"/> Selbsthilfegruppen                                               | ___ mal |
| <input type="checkbox"/> Pflegekurse                                                      | ___ mal |
| <input type="checkbox"/> sonstiges _____                                                  | ___ mal |

#### 4 Lebensqualität des Angehörigen – EQ-5D mit Visueller Analogskala

Bitte geben Sie an, welche Aussagen Ihren heutigen Gesundheitszustand am besten beschreiben, indem Sie ein Kreuz (☒) in ein Kästchen jeder Gruppe machen.

##### **Beweglichkeit/Mobilität**

- Ich habe keine Probleme herumzugehen
- Ich habe einige Probleme herumzugehen
- Ich bin ans Bett gebunden

##### **Für sich selbst sorgen**

- Ich habe keine Probleme, für mich selbst zu sorgen
- Ich habe einige Probleme, mich selbst zu waschen oder mich anzuziehen
- Ich bin nicht in der Lage, mich selbst zu waschen oder anzuziehen

##### **Allgemeine Tätigkeiten** (z.B. Arbeit, Studium, Hausarbeit, Familien- oder Freizeitaktivitäten)

- Ich habe keine Probleme, meinen alltäglichen Tätigkeiten nachzugehen
- Ich habe einige Probleme, meinen alltäglichen Tätigkeiten nachzugehen
- Ich bin nicht in der Lage, meinen alltäglichen Tätigkeiten nachzugehen

##### **Schmerzen/Körperliche Beschwerden**

- Ich habe keine Schmerzen oder Beschwerden
- Ich habe mäßige Schmerzen oder Beschwerden
- Ich habe extreme Schmerzen oder Beschwerden

##### **Angst/Niedergeschlagenheit**

- Ich bin nicht ängstlich oder deprimiert
- Ich bin mäßig ängstlich oder deprimiert
- Ich bin extrem ängstlich oder deprimiert

Um Sie bei der Einschätzung, wie gut oder wie schlecht Ihr Gesundheitszustand ist, zu unterstützen, haben wir eine Skala gezeichnet, ähnlich einem Thermometer. Der denkbar beste Gesundheitszustand ist mit einer "100" gekennzeichnet, der schlechteste mit "0".

**Wir möchten Sie nun bitten, auf dieser Skala zu kennzeichnen, wie gut oder schlecht Ihrer Ansicht nach Ihr persönlicher Gesundheitszustand heute ist. Bitte verbinden Sie dazu den untenstehenden Kasten mit dem Punkt auf der Skala, der Ihren heutigen Gesundheitszustand am besten wiedergibt.**

**Ihr  
heutiger  
Gesundheitszustand**

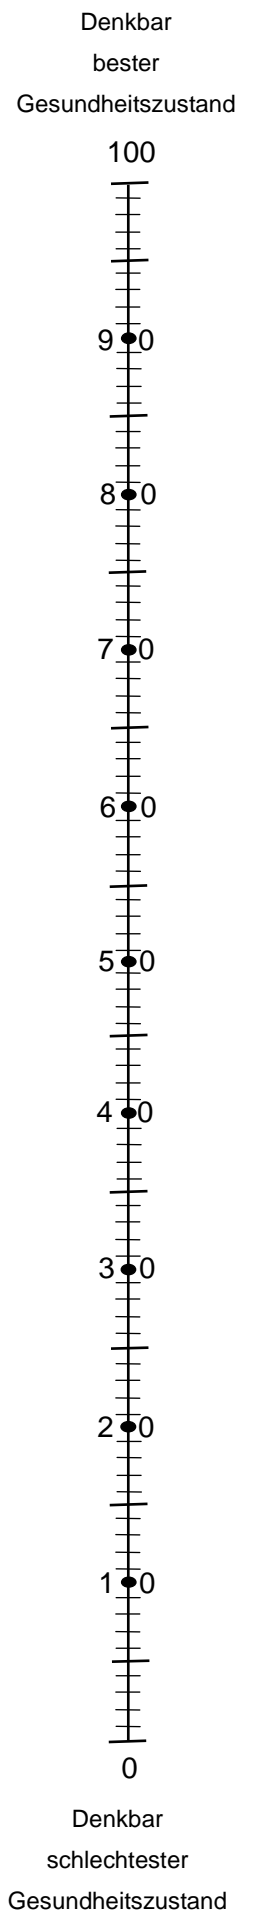

## **5 Angehörigenbefragung zur Lebensqualität (DEMQoL-proxy)**

**Knorr, Zerfaß & Frölich (2006)**

Wir wollen Sie über das Leben Ihres Angehörigen befragen, das Sie die Person sind, die Ihren Angehörigen am besten kennt. Es gibt keine richtigen und falschen Antworten. Geben Sie einfach die Antwort, die am besten beschreibt, wie sich Ihr Angehöriger in der letzten Woche gefühlt hat. Versetzen Sie sich hierfür so weit wie möglich in Ihren Angehörigen und versuchen Sie die Antwort so zu geben, wie dies Ihr Angehöriger vermutlich tun würde.

Da wir diese Fragen allen stellen müssen, kann es sein, dass sich einige Fragen auf Ihren Angehörigen schwer anwenden lassen. Wir bitten Sie in diesem Fall trotzdem die Antwort anzukreuzen, die am ehesten zutrifft.

Alle nun folgenden Fragen beziehen sich auf die letzte Woche!

Als erstes geht es um die Gefühle Ihres Angehörigen.

Wie oft fühlte sich Ihr Angehöriger aus seiner Sicht in der letzten Woche:

|    |                               |                          |                          |                          |                          |                          |            |
|----|-------------------------------|--------------------------|--------------------------|--------------------------|--------------------------|--------------------------|------------|
| 1. | <b>heiter</b>                 |                          |                          |                          |                          |                          |            |
|    | <input type="checkbox"/>      | <input type="checkbox"/> | <input type="checkbox"/> | <input type="checkbox"/> | <input type="checkbox"/> | <input type="checkbox"/> |            |
|    | <i>häufig</i>                 |                          | <i>manchmal</i>          |                          | <i>selten</i>            |                          | <i>nie</i> |
| 2. | <b>ängstlich oder besorgt</b> |                          |                          |                          |                          |                          |            |
|    | <input type="checkbox"/>      | <input type="checkbox"/> | <input type="checkbox"/> | <input type="checkbox"/> | <input type="checkbox"/> | <input type="checkbox"/> |            |
|    | <i>häufig</i>                 |                          | <i>manchmal</i>          |                          | <i>selten</i>            |                          | <i>nie</i> |
| 3. | <b>frustriert</b>             |                          |                          |                          |                          |                          |            |
|    | <input type="checkbox"/>      | <input type="checkbox"/> | <input type="checkbox"/> | <input type="checkbox"/> | <input type="checkbox"/> | <input type="checkbox"/> |            |
|    | <i>häufig</i>                 |                          | <i>manchmal</i>          |                          | <i>selten</i>            |                          | <i>nie</i> |
| 4. | <b>voller Energie</b>         |                          |                          |                          |                          |                          |            |
|    | <input type="checkbox"/>      | <input type="checkbox"/> | <input type="checkbox"/> | <input type="checkbox"/> | <input type="checkbox"/> | <input type="checkbox"/> |            |
|    | <i>häufig</i>                 |                          | <i>manchmal</i>          |                          | <i>selten</i>            |                          | <i>nie</i> |
| 5. | <b>traurig</b>                |                          |                          |                          |                          |                          |            |
|    | <input type="checkbox"/>      | <input type="checkbox"/> | <input type="checkbox"/> | <input type="checkbox"/> | <input type="checkbox"/> | <input type="checkbox"/> |            |
|    | <i>häufig</i>                 |                          | <i>manchmal</i>          |                          | <i>selten</i>            |                          | <i>nie</i> |
| 6. | <b>zufrieden</b>              |                          |                          |                          |                          |                          |            |
|    | <input type="checkbox"/>      | <input type="checkbox"/> | <input type="checkbox"/> | <input type="checkbox"/> | <input type="checkbox"/> | <input type="checkbox"/> |            |
|    | <i>häufig</i>                 |                          | <i>manchmal</i>          |                          | <i>selten</i>            |                          | <i>nie</i> |
| 7. | <b>bekümmert</b>              |                          |                          |                          |                          |                          |            |
|    | <input type="checkbox"/>      | <input type="checkbox"/> | <input type="checkbox"/> | <input type="checkbox"/> | <input type="checkbox"/> | <input type="checkbox"/> |            |
|    | <i>häufig</i>                 |                          | <i>manchmal</i>          |                          | <i>selten</i>            |                          | <i>nie</i> |
| 8. | <b>voller Leben</b>           |                          |                          |                          |                          |                          |            |
|    | <input type="checkbox"/>      | <input type="checkbox"/> | <input type="checkbox"/> | <input type="checkbox"/> | <input type="checkbox"/> | <input type="checkbox"/> |            |
|    | <i>häufig</i>                 |                          | <i>manchmal</i>          |                          | <i>selten</i>            |                          | <i>nie</i> |
| 9. | <b>gereizt</b>                |                          |                          |                          |                          |                          |            |
|    | <input type="checkbox"/>      | <input type="checkbox"/> | <input type="checkbox"/> | <input type="checkbox"/> | <input type="checkbox"/> | <input type="checkbox"/> |            |
|    | <i>häufig</i>                 |                          | <i>manchmal</i>          |                          | <i>selten</i>            |                          | <i>nie</i> |

Wie oft hatte Ihr Angehöriger aus seiner Sicht letzte Woche:

|     |                                                                    |                          |                          |                          |                          |                          |            |
|-----|--------------------------------------------------------------------|--------------------------|--------------------------|--------------------------|--------------------------|--------------------------|------------|
| 10. | <b>Die Nase voll von allem?</b>                                    |                          |                          |                          |                          |                          |            |
|     | <input type="checkbox"/>                                           | <input type="checkbox"/> | <input type="checkbox"/> | <input type="checkbox"/> | <input type="checkbox"/> | <input type="checkbox"/> |            |
|     | <i>häufig</i>                                                      |                          | <i>manchmal</i>          |                          | <i>selten</i>            |                          | <i>nie</i> |
| 11. | <b>Das Gefühl, dass es Dinge gibt auf die er sich freuen kann?</b> |                          |                          |                          |                          |                          |            |
|     | <input type="checkbox"/>                                           | <input type="checkbox"/> | <input type="checkbox"/> | <input type="checkbox"/> | <input type="checkbox"/> | <input type="checkbox"/> |            |
|     | <i>häufig</i>                                                      |                          | <i>manchmal</i>          |                          | <i>selten</i>            |                          | <i>nie</i> |

Als nächstes würden wir Sie gerne über das Gedächtnis Ihres Angehörigen befragen. Wie häufig war sie/ er letzte Woche aus Ihrer Sicht:

|     |                                                                         |                          |                          |                          |                          |                          |            |
|-----|-------------------------------------------------------------------------|--------------------------|--------------------------|--------------------------|--------------------------|--------------------------|------------|
| 12. | <b>Besorgt über sein Gedächtnis im Allgemeinen?</b>                     |                          |                          |                          |                          |                          |            |
|     | <input type="checkbox"/>                                                | <input type="checkbox"/> | <input type="checkbox"/> | <input type="checkbox"/> | <input type="checkbox"/> | <input type="checkbox"/> |            |
|     | <i>häufig</i>                                                           |                          | <i>manchmal</i>          |                          | <i>selten</i>            |                          | <i>nie</i> |
| 13. | <b>Besorgt, Dinge zu vergessen, die vor langer Zeit geschahen?</b>      |                          |                          |                          |                          |                          |            |
|     | <input type="checkbox"/>                                                | <input type="checkbox"/> | <input type="checkbox"/> | <input type="checkbox"/> | <input type="checkbox"/> | <input type="checkbox"/> |            |
|     | <i>häufig</i>                                                           |                          | <i>manchmal</i>          |                          | <i>selten</i>            |                          | <i>nie</i> |
| 14. | <b>Besorgt, Dinge zu vergessen die erst vor kurzem geschehen waren?</b> |                          |                          |                          |                          |                          |            |
|     | <input type="checkbox"/>                                                | <input type="checkbox"/> | <input type="checkbox"/> | <input type="checkbox"/> | <input type="checkbox"/> | <input type="checkbox"/> |            |
|     | <i>häufig</i>                                                           |                          | <i>manchmal</i>          |                          | <i>selten</i>            |                          | <i>nie</i> |
| 15. | <b>Besorgt, Namen von Leuten zu vergessen?</b>                          |                          |                          |                          |                          |                          |            |
|     | <input type="checkbox"/>                                                | <input type="checkbox"/> | <input type="checkbox"/> | <input type="checkbox"/> | <input type="checkbox"/> | <input type="checkbox"/> |            |
|     | <i>häufig</i>                                                           |                          | <i>manchmal</i>          |                          | <i>selten</i>            |                          | <i>nie</i> |
| 16. | <b>Besorgt, zu vergessen wo sie/er sich befindet?</b>                   |                          |                          |                          |                          |                          |            |
|     | <input type="checkbox"/>                                                | <input type="checkbox"/> | <input type="checkbox"/> | <input type="checkbox"/> | <input type="checkbox"/> | <input type="checkbox"/> |            |
|     | <i>häufig</i>                                                           |                          | <i>manchmal</i>          |                          | <i>selten</i>            |                          | <i>nie</i> |

|     |                                                                |                          |                          |                          |                          |                          |                          |
|-----|----------------------------------------------------------------|--------------------------|--------------------------|--------------------------|--------------------------|--------------------------|--------------------------|
| 17. | <i>Besorgt zu vergessen, welcher Tag ist?</i>                  |                          |                          |                          |                          |                          |                          |
|     | <input type="checkbox"/>                                       | <input type="checkbox"/> | <input type="checkbox"/> | <input type="checkbox"/> | <input type="checkbox"/> | <input type="checkbox"/> | <input type="checkbox"/> |
|     | <i>häufig</i>                                                  |                          | <i>manchmal</i>          |                          | <i>selten</i>            |                          | <i>nie</i>               |
| 18. | <i>Besorgt, dass die Gedanken durcheinander gehen?</i>         |                          |                          |                          |                          |                          |                          |
|     | <input type="checkbox"/>                                       | <input type="checkbox"/> | <input type="checkbox"/> | <input type="checkbox"/> | <input type="checkbox"/> | <input type="checkbox"/> | <input type="checkbox"/> |
|     | <i>häufig</i>                                                  |                          | <i>manchmal</i>          |                          | <i>selten</i>            |                          | <i>nie</i>               |
| 19. | <i>Besorgt über Schwierigkeiten Entscheidungen zu treffen?</i> |                          |                          |                          |                          |                          |                          |
|     | <input type="checkbox"/>                                       | <input type="checkbox"/> | <input type="checkbox"/> | <input type="checkbox"/> | <input type="checkbox"/> | <input type="checkbox"/> | <input type="checkbox"/> |
|     | <i>häufig</i>                                                  |                          | <i>manchmal</i>          |                          | <i>selten</i>            |                          | <i>nie</i>               |
| 20. | <i>Besorgt, sich verständlich machen zu können?</i>            |                          |                          |                          |                          |                          |                          |
|     | <input type="checkbox"/>                                       | <input type="checkbox"/> | <input type="checkbox"/> | <input type="checkbox"/> | <input type="checkbox"/> | <input type="checkbox"/> | <input type="checkbox"/> |
|     | <i>häufig</i>                                                  |                          | <i>manchmal</i>          |                          | <i>selten</i>            |                          | <i>nie</i>               |

Jetzt würden wir Sie gerne über den Alltag Ihres Angehörigen befragen.  
Wie häufig war sie/ er letzte Woche aus Ihrer Sicht:

|     |                                                                            |                          |                          |                          |                          |                          |                          |
|-----|----------------------------------------------------------------------------|--------------------------|--------------------------|--------------------------|--------------------------|--------------------------|--------------------------|
| 21. | <i>Besorgt, die eigene Körperhygiene (Duschen...) zu bewältigen</i>        |                          |                          |                          |                          |                          |                          |
|     | <input type="checkbox"/>                                                   | <input type="checkbox"/> | <input type="checkbox"/> | <input type="checkbox"/> | <input type="checkbox"/> | <input type="checkbox"/> | <input type="checkbox"/> |
|     | <i>häufig</i>                                                              |                          | <i>manchmal</i>          |                          | <i>selten</i>            |                          | <i>nie</i>               |
| 22. | <i>Besorgt, sich selbst hübsch machen zu können?</i>                       |                          |                          |                          |                          |                          |                          |
|     | <input type="checkbox"/>                                                   | <input type="checkbox"/> | <input type="checkbox"/> | <input type="checkbox"/> | <input type="checkbox"/> | <input type="checkbox"/> | <input type="checkbox"/> |
|     | <i>häufig</i>                                                              |                          | <i>manchmal</i>          |                          | <i>selten</i>            |                          | <i>nie</i>               |
| 23. | <i>Besorgt, sich selbst etwas einzukaufen was er/ sie möchte?</i>          |                          |                          |                          |                          |                          |                          |
|     | <input type="checkbox"/>                                                   | <input type="checkbox"/> | <input type="checkbox"/> | <input type="checkbox"/> | <input type="checkbox"/> | <input type="checkbox"/> | <input type="checkbox"/> |
|     | <i>häufig</i>                                                              |                          | <i>manchmal</i>          |                          | <i>selten</i>            |                          | <i>nie</i>               |
| 24. | <i>Besorgt, mit Geld umzugehen um selbständig Dinge zu bezahlen?</i>       |                          |                          |                          |                          |                          |                          |
|     | <input type="checkbox"/>                                                   | <input type="checkbox"/> | <input type="checkbox"/> | <input type="checkbox"/> | <input type="checkbox"/> | <input type="checkbox"/> | <input type="checkbox"/> |
|     | <i>häufig</i>                                                              |                          | <i>manchmal</i>          |                          | <i>selten</i>            |                          | <i>nie</i>               |
| 25. | <i>Besorgt um die eigenen Finanzen?</i>                                    |                          |                          |                          |                          |                          |                          |
|     | <input type="checkbox"/>                                                   | <input type="checkbox"/> | <input type="checkbox"/> | <input type="checkbox"/> | <input type="checkbox"/> | <input type="checkbox"/> | <input type="checkbox"/> |
|     | <i>häufig</i>                                                              |                          | <i>manchmal</i>          |                          | <i>selten</i>            |                          | <i>nie</i>               |
| 26. | <i>Besorgt, dass sie/ er für Dinge jetzt mehr Zeit braucht als früher?</i> |                          |                          |                          |                          |                          |                          |
|     | <input type="checkbox"/>                                                   | <input type="checkbox"/> | <input type="checkbox"/> | <input type="checkbox"/> | <input type="checkbox"/> | <input type="checkbox"/> | <input type="checkbox"/> |
|     | <i>häufig</i>                                                              |                          | <i>manchmal</i>          |                          | <i>selten</i>            |                          | <i>nie</i>               |
| 27. | <i>Besorgt, wie sie/ er mit Leuten in Berührung kommt?</i>                 |                          |                          |                          |                          |                          |                          |
|     | <input type="checkbox"/>                                                   | <input type="checkbox"/> | <input type="checkbox"/> | <input type="checkbox"/> | <input type="checkbox"/> | <input type="checkbox"/> | <input type="checkbox"/> |
|     | <i>häufig</i>                                                              |                          | <i>manchmal</i>          |                          | <i>selten</i>            |                          | <i>nie</i>               |
| 28. | <i>Besorgt, nicht genug soziale Kontakte/ Gesellschaft zu haben?</i>       |                          |                          |                          |                          |                          |                          |
|     | <input type="checkbox"/>                                                   | <input type="checkbox"/> | <input type="checkbox"/> | <input type="checkbox"/> | <input type="checkbox"/> | <input type="checkbox"/> | <input type="checkbox"/> |
|     | <i>häufig</i>                                                              |                          | <i>manchmal</i>          |                          | <i>selten</i>            |                          | <i>nie</i>               |
| 29. | <i>Besorgt, unfähig zu sein, anderen Leuten zu helfen?</i>                 |                          |                          |                          |                          |                          |                          |
|     | <input type="checkbox"/>                                                   | <input type="checkbox"/> | <input type="checkbox"/> | <input type="checkbox"/> | <input type="checkbox"/> | <input type="checkbox"/> | <input type="checkbox"/> |
|     | <i>häufig</i>                                                              |                          | <i>manchmal</i>          |                          | <i>selten</i>            |                          | <i>nie</i>               |
| 30. | <i>Besorgt, zu nicht Nutzen zu sein?</i>                                   |                          |                          |                          |                          |                          |                          |
|     | <input type="checkbox"/>                                                   | <input type="checkbox"/> | <input type="checkbox"/> | <input type="checkbox"/> | <input type="checkbox"/> | <input type="checkbox"/> | <input type="checkbox"/> |
|     | <i>häufig</i>                                                              |                          | <i>manchmal</i>          |                          | <i>selten</i>            |                          | <i>nie</i>               |
| 31. | <i>Besorgt über ihre/seine körperliche Gesundheit?</i>                     |                          |                          |                          |                          |                          |                          |
|     | <input type="checkbox"/>                                                   | <input type="checkbox"/> | <input type="checkbox"/> | <input type="checkbox"/> | <input type="checkbox"/> | <input type="checkbox"/> | <input type="checkbox"/> |
|     | <i>häufig</i>                                                              |                          | <i>manchmal</i>          |                          | <i>selten</i>            |                          | <i>nie</i>               |

Sie haben jetzt über viele Lebensbereiche Ihres Angehörigen Auskunft gegeben;  
über Gefühle, über das Gedächtnis und den Alltag.

|     |                                                                                                                                                                      |                          |                          |                          |                          |                          |                          |
|-----|----------------------------------------------------------------------------------------------------------------------------------------------------------------------|--------------------------|--------------------------|--------------------------|--------------------------|--------------------------|--------------------------|
| 32. | <i>Wenn Sie nun noch einmal an all diese Bereiche denken, wie würde Ihre Angehörige/ Ihr Angehöriger wohl ihre/ seine Lebensqualität im Allgemeinen beschreiben?</i> |                          |                          |                          |                          |                          |                          |
|     | <input type="checkbox"/>                                                                                                                                             | <input type="checkbox"/> | <input type="checkbox"/> | <input type="checkbox"/> | <input type="checkbox"/> | <input type="checkbox"/> | <input type="checkbox"/> |
|     | <i>sehr gut</i>                                                                                                                                                      |                          | <i>gut</i>               |                          | <i>mäßig</i>             |                          | <i>schlecht</i>          |

**6 Zufriedenheit mit der Unterstützung bei der pflegerischen Versorgung**

**Wie zufrieden sind Sie im Großen und Ganzen mit der Unterstützung, die Sie erhalten?**

**Bitte markieren Sie auf der nebenstehenden Skala, wie gut oder wie schlecht Sie im Großen und Ganzen die Unterstützung, die Sie erhalten, einschätzen. Bitte machen Sie dafür ein Kreuz auf der Linie.**

Sehr zufrieden  
mit der Unterstützung  
insgesamt

100

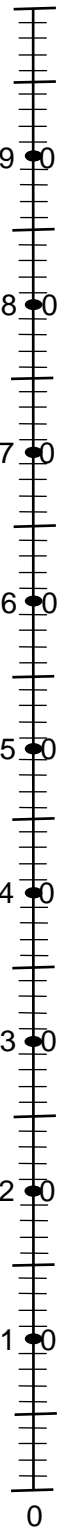

Sehr unzufrieden  
mit der Unterstützung  
insgesamt

## 7 Belastung des pflegenden Angehörigen- Zarit Burden Scale

|     |                                                                                                                                                                    | Nie | Selten | Manch-<br>mal | Häufig | Fast<br>Immer |
|-----|--------------------------------------------------------------------------------------------------------------------------------------------------------------------|-----|--------|---------------|--------|---------------|
| 1.  | Glauben Sie, dass Ihre/Ihr Angehörige / Angehöriger um mehr Hilfe bitte als sie/er braucht?                                                                        | 0   | 1      | 2             | 3      | 4             |
| 2.  | Sind Sie der Meinung, dass Sie durch die Zeit, die Sie mit Ihrer/Ihrem Angehörigen verbringen, nicht ausreichend Zeit für sich selbst haben?                       | 0   | 1      | 2             | 3      | 4             |
| 3.  | Fühlen Sie sich überfordert bei Ihrem Versuch, neben der Pflege Ihres Angehörigen Ihren anderen Verpflichtungen gegenüber Familie oder Beruf nachzukommen?         | 0   | 1      | 2             | 3      | 4             |
| 4.  | Bringt Sie das Verhalten Ihrer/Ihres Angehörigen in Verlegenheit?                                                                                                  | 0   | 1      | 2             | 3      | 4             |
| 5.  | Sind Sie wütend, wenn Sie bei Ihrer/Ihrem Angehörigen sind?                                                                                                        | 0   | 1      | 2             | 3      | 4             |
| 6.  | Glauben Sie, dass Ihre/Ihr Angehörige/Angehöriger zurzeit Ihre Beziehungen mit anderen Familienmitgliedern oder Freunden negativ beeinflusst?                      | 0   | 1      | 2             | 3      | 4             |
| 7.  | Haben Sie Angst, was die Zukunft für Ihre/Ihren Angehörige/Angehörigen bringt?                                                                                     | 0   | 1      | 2             | 3      | 4             |
| 8.  | Glauben Sie, dass Ihre/Ihr Angehörige / Angehöriger von Ihnen abhängig ist?                                                                                        | 0   | 1      | 2             | 3      | 4             |
| 9.  | Fühlen Sie sich angespannt, wenn Sie bei Ihrer / Ihrem Angehörigen sind?                                                                                           | 0   | 1      | 2             | 3      | 4             |
| 10. | Glauben Sie, dass Ihre Gesundheit unter Ihrem Engagement in der Pflege Ihrer/Ihres Angehörigen leidet, bzw. gelitten hat?                                          | 0   | 1      | 2             | 3      | 4             |
| 11. | Haben Sie das Gefühl, dass Sie wegen Ihrer/Ihrem Angehörigen weniger Privatsphäre oder Raum für sich allein haben, als Sie es gerne hätten?                        | 0   | 1      | 2             | 3      | 4             |
| 12. | Sind Sie der Meinung, dass Ihr Sozialleben unter der Pflege Ihrer / Ihres Angehörigen leidet bzw. gelitten hat?                                                    | 0   | 1      | 2             | 3      | 4             |
| 13. | Ist es Ihnen wegen Ihrer/Ihrem Angehörigen unangenehm, Freunde zu Besuch zu haben?                                                                                 | 0   | 1      | 2             | 3      | 4             |
| 14. | Glauben Sie, dass Ihre/Ihr Angehörige/ Angehöriger von Ihnen erwartet, dass Sie sie/ihn pflegen, als wären Sie die einzige Person, von der sie/er abhängen könnte? | 0   | 1      | 2             | 3      | 4             |



|            |                                                                                                                                         |   |   |   |   |   |
|------------|-----------------------------------------------------------------------------------------------------------------------------------------|---|---|---|---|---|
| <b>15.</b> | Sind Sie der Meinung, dass Sie nicht genug Geld für die Pflege Ihrer / Ihres Angehörigen zusätzlich zu Ihren restlichen Ausgaben haben? | 0 | 1 | 2 | 3 | 4 |
| <b>16.</b> | Glauben Sie, dass Sie außerstande sein werden, Ihre / Ihren Angehörige / Angehörigen viel länger zu pflegen?                            | 0 | 1 | 2 | 3 | 4 |
| <b>17.</b> | Glauben Sie, seit der Krankheit Ihrer/Ihres Angehörigen, die Kontrolle über Ihr eigenes Leben verloren zu haben?                        | 0 | 1 | 2 | 3 | 4 |
| <b>18.</b> | Wünschen Sie sich, die Pflege Ihrer/Ihres Angehörigen jemand anderem überlassen zu können?                                              | 0 | 1 | 2 | 3 | 4 |
| <b>19.</b> | Sind Sie unsicher, was Sie im Fall Ihrer/Ihres Angehörigen unternehmen sollten?                                                         | 0 | 1 | 2 | 3 | 4 |
| <b>20.</b> | Glauben Sie, Sie sollten mehr für Ihre/Ihren Angehörige/ Angehörigen tun?                                                               | 0 | 1 | 2 | 3 | 4 |
| <b>21.</b> | Sind Sie der Meinung, dass Sie die Pflege Ihrer/Ihres Angehörigen besser machen könnten?                                                | 0 | 1 | 2 | 3 | 4 |
| <b>22.</b> | Wie stark fühlen Sie sich insgesamt durch die Pflege Ihrer/Ihres Angehörigen belastet?                                                  | 0 | 1 | 2 | 3 | 4 |
|            |                                                                                                                                         |   |   |   |   |   |

## 8 Neuropsychiatrisches Inventar (12 Items) – NPI 12

### 8.1 Wahnvorstellungen

„Glaubt der/die Patient/in Dinge, von denen Sie wissen, dass sie nicht wahr sind? Besteht er/sie z.B. darauf, dass andere Leute versuchen, ihm/ihr Schaden zuzufügen oder ihn/sie zu bestehlen? Hat er/sie gesagt, Familienmitglieder seien nicht die, die sie zu sein vorgeben oder dass das Haus nicht deren Zuhause sei? Ich frage nicht nach bloßem Misstrauen; Ich bin interessiert daran, ob der Patient überzeugt ist, dass ihm/ihr diese Dinge passieren.“

- N/A** (falls N/A, kreuzen Sie hieran und gehen Sie weiter zu der Frage auf der nächsten Seite.)
- NEIN** (falls "nein", kreuzen Sie hier an und gehen Sie weiter zu der Frage auf der nächsten Seite.)
- JA** (falls "ja", bitte gehen Sie weiter zu den Unterfragen). (Bitte ankreuzen)

|    |                                                                                                                                                                                               | Nein                     | Ja                       |
|----|-----------------------------------------------------------------------------------------------------------------------------------------------------------------------------------------------|--------------------------|--------------------------|
| 1. | Glaubt der/die Patient/in, dass er/sie in Gefahr ist, dass andere planen, ihm/ihr weh zu tun?                                                                                                 | <input type="checkbox"/> | <input type="checkbox"/> |
| 2. | Glaubt der /die Patient/in, dass andere ihn/sie bestehlen?                                                                                                                                    | <input type="checkbox"/> | <input type="checkbox"/> |
| 3. | Glaubt der/die Patient/in, dass ihr/seine Partner/-in eine Affäre hat?                                                                                                                        | <input type="checkbox"/> | <input type="checkbox"/> |
| 4. | Glaubt der /die Patient/in, dass unwillkommene Gäste in seinem/ihrer Haus leben?                                                                                                              | <input type="checkbox"/> | <input type="checkbox"/> |
| 5. | Glaubt der /die Patient/in, dass ihr/seine Partner/in oder andere nicht die sind, die sie zu sein vorgeben?                                                                                   | <input type="checkbox"/> | <input type="checkbox"/> |
| 6. | Glaubt der /die Patient/in, dass sein/ihr Haus nicht sein/ihr Zuhause ist?                                                                                                                    | <input type="checkbox"/> | <input type="checkbox"/> |
| 7. | Glaubt der /die Patient/in, dass Familienmitglieder planen, ihn/sie zu verlassen                                                                                                              | <input type="checkbox"/> | <input type="checkbox"/> |
| 8. | Glaubt der /die Patient/in, dass Personen aus dem Fernsehen oder aus Zeitschriften tatsächlich bei ihm/ihr Zuhause anwesend sind? (Versucht er/sie mit ihnen zu reden oder zu interagieren?)? | <input type="checkbox"/> | <input type="checkbox"/> |
| 9. | Glaubt er/sie irgendwelche ungewöhnlichen Dinge nach denen ich nicht gefragt habe?                                                                                                            | <input type="checkbox"/> | <input type="checkbox"/> |

Wenn sich die Leitfrage durch die Antworten auf die Unterfragen bestätigt, bestimmen Sie die Häufigkeit und Schwere der Wahnvorstellungen und die Belastung durch die Wahnvorstellungen.

|                                                                                               |    |                                                                                                                                                                                                                                                 |
|-----------------------------------------------------------------------------------------------|----|-------------------------------------------------------------------------------------------------------------------------------------------------------------------------------------------------------------------------------------------------|
| Häufigkeit:<br>(Kreisen Sie eine Zahl ein)                                                    | 1. | Selten - weniger als einmal pro Woche                                                                                                                                                                                                           |
|                                                                                               | 2. | Manchmal - etwa einmal die Woche                                                                                                                                                                                                                |
|                                                                                               | 3. | Häufig - mehrmals pro Woche, aber nicht jeden Tag                                                                                                                                                                                               |
|                                                                                               | 4. | Sehr häufig - einmal oder mehrmals pro Tag                                                                                                                                                                                                      |
| Schweregrad:<br>(Kreisen Sie eine Zahl ein)                                                   | 1. | Leicht -die Wahnvorstellungen sind vorhanden, scheinen aber harmlos und belasten den Patienten nur wenig                                                                                                                                        |
|                                                                                               | 2. | Mäßig - die Wahnvorstellungen sind belastend und störend                                                                                                                                                                                        |
|                                                                                               | 3. | Deutlich - die Wahnvorstellungen sind sehr störend und eine Hauptursache für Verhaltensstörungen. (Falls Medikamente, die der Patient nach Bedarf einnimmt, verordnet sind, zeigt deren Gebrauch an, dass die Wahnvorstellungen deutlich sind.) |
| Belastung: Wie stark sind Sie durch dieses Verhalten belastet?<br>(Kreisen Sie eine Zahl ein) | 0  | Überhaupt nicht                                                                                                                                                                                                                                 |
|                                                                                               | 1. | Minimal                                                                                                                                                                                                                                         |
|                                                                                               | 2. | Leicht                                                                                                                                                                                                                                          |
|                                                                                               | 3. | Mäßig                                                                                                                                                                                                                                           |
|                                                                                               | 4. | Schwer                                                                                                                                                                                                                                          |
|                                                                                               | 5. | Sehr schwer oder extrem                                                                                                                                                                                                                         |

## 8.2 Halluzinationen

„Hat der/die Patient/in optische, akustische oder andere Halluzinationen? Scheint er/sie Dinge zu sehen, zu hören oder wahrzunehmen, die nicht vorhanden sind? Mit dieser Frage meine ich nicht irrtümliche Annahmen wie etwa die Behauptung, dass jemand, der gestorben ist noch lebt; Ich frage eher, ob der/die Patient/in tatsächlich abnormale Sinneseindrücke akustischer oder visueller Art hat.“

- N/A (falls N/A, kreuzen Sie hier an und gehen Sie weiter zu der Frage auf der nächsten Seite.)**
- NEIN (falls "nein", kreuzen Sie hieran und gehen Sie weiter zu der Frage auf der nächsten Seite.)**
- JA (falls "ja", bitte gehen Sie weiter zu den Unterfragen).**

|    |                                                                                                                                                                                                                         | Nein                     | Ja                       |
|----|-------------------------------------------------------------------------------------------------------------------------------------------------------------------------------------------------------------------------|--------------------------|--------------------------|
| 1. | Schildert der/die Patient/in, dass er/sie Stimmen hört, oder handelt er/sie, als ob er/sie Stimmen hört?                                                                                                                | <input type="checkbox"/> | <input type="checkbox"/> |
| 2. | Spricht der/die Patient/in zu Menschen, die nicht da sind?                                                                                                                                                              | <input type="checkbox"/> | <input type="checkbox"/> |
| 3. | Schildert der/die Patient/in, dass er/sie Dinge sieht, die nicht von anderen gesehen werden, oder verhält er/sie sich, als ob er/sie Dinge sieht, die nicht von anderen gesehen werden (Menschen, Tiere, Lichter etc.)? | <input type="checkbox"/> | <input type="checkbox"/> |
| 4. | Berichtet der/die Patient/in über Gerüche, die nicht von anderen wahrgenommen werden?                                                                                                                                   | <input type="checkbox"/> | <input type="checkbox"/> |
| 5. | Schildert der/die Patient/in, dass er/sie Dinge auf seiner/ihrer Haut fühlt, oder scheint er/sie Dinge auf seiner/ihrer Haut zu fühlen, die krabbeln oder ihn/sie berühren?                                             | <input type="checkbox"/> | <input type="checkbox"/> |
| 6. | Schildert der/die Patient/in Geschmackseindrücke, die ohne jeden erkennbaren Grund sind?                                                                                                                                | <input type="checkbox"/> | <input type="checkbox"/> |
| 7. | Schildert der/die Patient/in irgendwelche anderen ungewöhnlichen Sinneseindrücke?                                                                                                                                       | <input type="checkbox"/> | <input type="checkbox"/> |

Wurde die Leitfrage durch die Antworten auf die Unterfragen bestätigt, bestimmen Sie bitte die Häufigkeit und Schwere der Halluzinationen und die Belastung durch die Halluzinationen.

|                                                                                               |    |                                                                                                                                                                                             |
|-----------------------------------------------------------------------------------------------|----|---------------------------------------------------------------------------------------------------------------------------------------------------------------------------------------------|
| Häufigkeit:<br>(Kreisen Sie eine Zahl ein)                                                    | 1. | Selten - weniger als einmal pro Woche                                                                                                                                                       |
|                                                                                               | 2. | Manchmal - etwa einmal die Woche                                                                                                                                                            |
|                                                                                               | 3. | Häufig - mehrmals pro Woche, aber nicht jeden Tag                                                                                                                                           |
|                                                                                               | 4. | Sehr häufig - einmal oder mehrmals pro Tag                                                                                                                                                  |
| Schweregrad:<br>(Kreisen Sie eine Zahl ein)                                                   | 1. | Leicht- die Halluzinationen sind vorhanden, aber harmlos und belasten den Patienten nur wenig                                                                                               |
|                                                                                               | 2. | Mäßig - die Halluzinationen sind belastend und störend für den Patienten.                                                                                                                   |
|                                                                                               | 3. | Deutlich - die Halluzinationen sind sehr störend und eine Hauptursache für Verhaltensstörungen. Medikamente, die der Patient nach Bedarf einnimmt, können zur Behandlung erforderlich sein. |
| Belastung: Wie stark sind Sie durch dieses Verhalten belastet?<br>(Kreisen Sie eine Zahl ein) | 0  | Überhaupt nicht                                                                                                                                                                             |
|                                                                                               | 1. | Minimal                                                                                                                                                                                     |
|                                                                                               | 2. | Leicht                                                                                                                                                                                      |
|                                                                                               | 3. | Mäßig                                                                                                                                                                                       |
|                                                                                               | 4. | Schwer                                                                                                                                                                                      |
|                                                                                               | 5. | Sehr schwer oder extrem                                                                                                                                                                     |

### 8.3 Erregung/Aggression

„Gibt es bei dem/der Patient/in Zeiten, in denen er/sie sich weigert, zu kooperieren oder sich nicht von anderen helfen lassen will? Ist es schwer, mit ihm/ihr umzugehen?“

- N/A (falls N/A, kreuzen Sie hier an und gehen Sie weiter zu der Frage auf der nächsten Seite.)**
- NEIN (falls "nein", kreuzen Sie hieran und gehen Sie weiter zu der Frage auf der nächsten Seite.)**
- JA (falls "ja", bitte gehen Sie weiter zu den Unterfragen).**

|    |                                                                                                                                                                  | Nein                     | Ja                       |
|----|------------------------------------------------------------------------------------------------------------------------------------------------------------------|--------------------------|--------------------------|
| 1. | Wird der/die Patient/in wütend über diejenigen, die versuchen sich um ihn/sie zu kümmern oder widersetzt er/sie sich Aktivitäten wie Baden oder Kleiderwechseln? | <input type="checkbox"/> | <input type="checkbox"/> |
| 2. | Ist der/die Patient/in eigensinnig, will seinen/ihren Kopf durchsetzen?                                                                                          | <input type="checkbox"/> | <input type="checkbox"/> |
| 3. | Ist der/die Patient/in unkooperativ, widersetzt er/sie sich der Hilfe anderer?                                                                                   | <input type="checkbox"/> | <input type="checkbox"/> |
| 4. | Zeigt der/die Patient/in irgendein anderes Verhalten, das es schwierig macht, mit ihm/ihr umzugehen?                                                             | <input type="checkbox"/> | <input type="checkbox"/> |
| 5. | Schreit oder flucht der/die Patient/in?                                                                                                                          | <input type="checkbox"/> | <input type="checkbox"/> |
| 6. | Knallt der/die Patient/in Türen zu, tritt gegen Möbel oder wirft mit Gegenständen?                                                                               | <input type="checkbox"/> | <input type="checkbox"/> |
| 7. | Versucht der/die Patient/in andere zu verletzen oder zu schlagen?                                                                                                | <input type="checkbox"/> | <input type="checkbox"/> |
| 8. | Zeigt der/die Patient/in irgendein anderes aggressives oder erregtes Verhalten?                                                                                  | <input type="checkbox"/> | <input type="checkbox"/> |

Wurde die Leitfrage durch die Antworten auf die Unterfragen bestätigt, bestimmen Sie bitte die Häufigkeit und Schwere der Erregung/Aggression und die Belastung durch die Erregung/Aggression.

|                                                                                               |    |                                                                                                                                                                                                      |
|-----------------------------------------------------------------------------------------------|----|------------------------------------------------------------------------------------------------------------------------------------------------------------------------------------------------------|
| Häufigkeit:<br>(Kreisen Sie eine Zahl ein)                                                    | 1. | Selten - weniger als einmal pro Woche                                                                                                                                                                |
|                                                                                               | 2. | Manchmal - etwa einmal die Woche                                                                                                                                                                     |
|                                                                                               | 3. | Häufig - mehrmals pro Woche, aber nicht jeden Tag                                                                                                                                                    |
|                                                                                               | 4. | Sehr häufig - einmal oder mehrmals pro Tag                                                                                                                                                           |
| Schweregrad:<br>(Kreisen Sie eine Zahl ein)                                                   | 1. | Leicht- das Verhalten ist störend, kann aber auch durch Lenkung und Beruhigung bewältigt werden                                                                                                      |
|                                                                                               | 2. | Mäßig - das Verhalten ist störend und schwierig zu lenken oder zu kontrollieren                                                                                                                      |
|                                                                                               | 3. | Deutlich - die Erregung ist sehr störend und eine Hauptursache von Schwierigkeiten; möglicherweise befürchtet er/sie, dass ihm/ihr von anderen weh getan wird. Medikamente sind häufig erforderlich. |
| Belastung: Wie stark sind Sie durch dieses Verhalten belastet?<br>(Kreisen Sie eine Zahl ein) | 0  | Überhaupt nicht                                                                                                                                                                                      |
|                                                                                               | 1. | Minimal                                                                                                                                                                                              |
|                                                                                               | 2. | Leicht                                                                                                                                                                                               |
|                                                                                               | 3. | Mäßig                                                                                                                                                                                                |
|                                                                                               | 4. | Schwer                                                                                                                                                                                               |
|                                                                                               | 5. | Sehr schwer oder extrem                                                                                                                                                                              |

## 8.4 Depression

"Scheint der/die Patient/in traurig oder deprimiert zu sein? Sagt er/sie, dass er/sie sich traurig oder deprimiert fühlt?"

- N/A (falls N/A, kreuzen Sie hier an und gehen Sie weiter zu der Frage auf der nächsten Seite.)**
- NEIN (falls "nein", kreuzen Sie hieran und gehen Sie weiter zu der Frage auf der nächsten Seite.)**
- JA (falls "ja", bitte gehen Sie weiter zu den Unterfragen).**

|    |                                                                                                                           | Nein                     | Ja                       |
|----|---------------------------------------------------------------------------------------------------------------------------|--------------------------|--------------------------|
| 1. | Gibt es Zeiten, in denen der/die Patient/in weinerlich ist oder schluchzt, was darauf hindeutet, dass er/sie traurig ist? | <input type="checkbox"/> | <input type="checkbox"/> |
| 2. | Sagt der/die Patient/in, dass er/sie traurig oder niedergeschlagen ist oder verhält er/sie sich so?                       | <input type="checkbox"/> | <input type="checkbox"/> |
| 3. | Macht der/die Patient/in sich selbst schlecht oder sagt er/sie, dass er/sie sich als Versager/-in fühlt?                  | <input type="checkbox"/> | <input type="checkbox"/> |
| 4. | Sagt der/die Patient/in, dass er/sie ein schlechter Mensch ist und verdient, bestraft zu werden?                          | <input type="checkbox"/> | <input type="checkbox"/> |
| 5. | Scheint der/die Patient/in sehr mutlos zu sein und sagt er/sie, dass er/sie keine Zukunft hat?                            | <input type="checkbox"/> | <input type="checkbox"/> |
| 6. | Sagt der/die Patient/in, dass er/sie eine Last für die Familie ist oder, dass die Familie ohne ihn/sie besser dran wäre?  | <input type="checkbox"/> | <input type="checkbox"/> |
| 7. | Äußert der/die Patient/in den Wunsch tot zu sein oder spricht er/sie darüber, sich zu töten?                              | <input type="checkbox"/> | <input type="checkbox"/> |
| 8. | Zeigt der/die Patient/in irgendwelche anderen Anzeichen von Depression oder Traurigkeit?                                  | <input type="checkbox"/> | <input type="checkbox"/> |

Wurde die Leitfrage durch die Antworten auf die Unterfragen bestätigt, bestimmen Sie bitte die Häufigkeit und Schwere der Depression/Dysphorie und die Belastung durch die Depression/Dysphorie.

|                                                                                               |    |                                                                                                                                     |
|-----------------------------------------------------------------------------------------------|----|-------------------------------------------------------------------------------------------------------------------------------------|
| Häufigkeit:<br>(Kreisen Sie eine Zahl ein)                                                    | 1. | Selten - weniger als einmal pro Woche                                                                                               |
|                                                                                               | 2. | Manchmal - etwa einmal die Woche                                                                                                    |
|                                                                                               | 3. | Häufig - mehrmals pro Woche, aber nicht jeden Tag                                                                                   |
|                                                                                               | 4. | Sehr häufig - beinahe immer vorhanden                                                                                               |
| Schweregrad:<br>(Kreisen Sie eine Zahl ein)                                                   | 1. | Leicht - die Depression ist belastend, spricht aber normalerweise auf Lenkung oder Beruhigung an                                    |
|                                                                                               | 2. | Mäßig - die Depression ist belastend, depressive Symptome werden von dem/der Patient/in spontan geäußert und sind schwer zu lindern |
|                                                                                               | 3. | Deutlich - die Depression ist sehr belastend und eine Hauptursache für Leiden beim Patienten                                        |
| Belastung: Wie stark sind Sie durch dieses Verhalten belastet?<br>(Kreisen Sie eine Zahl ein) | 0  | Überhaupt nicht                                                                                                                     |
|                                                                                               | 1. | Minimal                                                                                                                             |
|                                                                                               | 2. | Leicht                                                                                                                              |
|                                                                                               | 3. | Mäßig                                                                                                                               |
|                                                                                               | 4. | Schwer                                                                                                                              |
|                                                                                               | 5. | Sehr schwer oder extrem                                                                                                             |

## 8.5 Angst

„Ist der/die Patient/-in ohne ersichtlichen Grund sehr nervös, besorgt oder verängstigt? Scheint er/sie sehr angespannt oder zappelig? Hat der/die Patient/in Angst davor, von Ihnen getrennt zu sein?“

- N/A (falls N/A, kreuzen Sie hier an und gehen Sie weiter zu der Frage auf der nächsten Seite.)**
- NEIN (falls "nein", kreuzen Sie hieran und gehen Sie weiter zu der Frage auf der nächsten Seite.)**
- JA (falls "ja", bitte gehen Sie weiter zu den Unterfragen).**

|    |                                                                                                                                                                                                               | Nein                     | Ja                       |
|----|---------------------------------------------------------------------------------------------------------------------------------------------------------------------------------------------------------------|--------------------------|--------------------------|
| 1. | Sagt der/die Patient/in, dass er/sie Angst hat vor geplanten Ereignissen?                                                                                                                                     | <input type="checkbox"/> | <input type="checkbox"/> |
| 2. | Gibt es Zeiten, in denen der/die Patient/in sich schwach, unfähig sich zu entspannen oder übermäßig angespannt fühlt?                                                                                         | <input type="checkbox"/> | <input type="checkbox"/> |
| 3. | Gibt es Zeiten, in denen der/die Patient/in kurzatmig ist, nach Luft schnappt oder seufzt oder darüber klagt, ohne einen anderen ersichtlichen Grund als Nervosität?                                          | <input type="checkbox"/> | <input type="checkbox"/> |
| 4. | Klagt der/die Patient/in über ein mulmiges Gefühl in der Magengegend oder über Herzrasen oder Herzklopfen in Verbindung mit Nervosität? (Symptome, die sich nicht durch schlechte Gesundheit erklären lassen) | <input type="checkbox"/> | <input type="checkbox"/> |
| 5. | Meidet der/die Patient/in bestimmte Orte oder Situationen, die ihn/sie nervös machen wie Autofahren, Treffen mit Freunden oder den Aufenthalt in Menschenmengen?                                              | <input type="checkbox"/> | <input type="checkbox"/> |
| 6. | Wird der/die Patient/in nervös und aufgeregt, wenn er/sie von Ihnen getrennt ist (oder von seiner/ihrer Betreuungsperson)? (Klammert er/sie sich an Sie, um eine Trennung zu vermeiden?)                      | <input type="checkbox"/> | <input type="checkbox"/> |
| 7. | Zeigt der/die Patient/in irgendwelche anderen Anzeichen von Angst?                                                                                                                                            | <input type="checkbox"/> | <input type="checkbox"/> |

Wurde die Leitfrage durch die Antworten auf die Unterfragen bestätigt, bestimmen Sie bitte die Häufigkeit und Schwere der Angst und die Belastung durch die Angst.

|                                                                                               |    |                                                                                                                          |
|-----------------------------------------------------------------------------------------------|----|--------------------------------------------------------------------------------------------------------------------------|
| Häufigkeit:<br>(Kreisen Sie eine Zahl ein)                                                    | 1. | Selten - weniger als einmal pro Woche                                                                                    |
|                                                                                               | 2. | Manchmal - etwa einmal die Woche                                                                                         |
|                                                                                               | 3. | Häufig - mehrmals pro Woche, aber nicht jeden Tag                                                                        |
|                                                                                               | 4. | Sehr häufig - einmal oder mehrmals pro Tag                                                                               |
| Schweregrad:<br>(Kreisen Sie eine Zahl ein)                                                   | 1. | Leicht - die Angst ist belastend, spricht aber normalerweise auf Lenkung oder Beruhigung an                              |
|                                                                                               | 2. | Mäßig - die Angst ist belastend, die Symptome der Angst werden vom Patienten spontan geäußert und sind schwer zu lindern |
|                                                                                               | 3. | Deutlich - die Angst ist sehr belastend und eine Hauptursache für Leiden beim Patienten                                  |
| Belastung: Wie stark sind Sie durch dieses Verhalten belastet?<br>(Kreisen Sie eine Zahl ein) | 0  | Überhaupt nicht                                                                                                          |
|                                                                                               | 1. | Minimal                                                                                                                  |
|                                                                                               | 2. | Leicht                                                                                                                   |
|                                                                                               | 3. | Mäßig                                                                                                                    |
|                                                                                               | 4. | Schwer                                                                                                                   |
|                                                                                               | 5. | Sehr schwer oder extrem                                                                                                  |

## 6. Hochstimmung/Euphorie

„Scheint der/die Patient/in ohne ersichtlichen Grund zu fröhlich oder glücklich zu sein? Ich meine damit nicht die normale Freude, die man empfindet, wenn man Freunde sieht, Geschenke bekommt oder Zeit mit Familienmitgliedern verbringt. Ich frage, ob der/die Patient/in anhaltende und abnormale gute Laune hat oder etwas lustig findet, was andere nicht so empfinden.“

- N/A** (falls N/A, kreuzen Sie hier an und gehen Sie weiter zu der Frage auf der nächsten Seite.)  
 **NEIN** (falls "nein", kreuzen Sie hieran und gehen Sie weiter zu der Frage auf der nächsten Seite.)  
 **JA** (falls "ja", bitte gehen Sie weiter zu den Unterfragen).

|    |                                                                                                                                                                               | Nein                     | Ja                       |
|----|-------------------------------------------------------------------------------------------------------------------------------------------------------------------------------|--------------------------|--------------------------|
| 1. | Scheint der/die Patient/in sich zu gut zu fühlen oder zu glücklich zu sein, im Unterschied zu seinem/ihrer normalen Verhalten?                                                | <input type="checkbox"/> | <input type="checkbox"/> |
| 2. | Findet der/die Patient/in etwas lustig oder lacht er/sie über Dinge, die andere nicht komisch finden?                                                                         | <input type="checkbox"/> | <input type="checkbox"/> |
| 3. | Scheint der/die Patient/in einen kindischen Sinn für Humor zu haben mit einer Tendenz, unangemessen zu kichern oder zu lachen (z.B. wenn anderen etwas Unangenehmes zustößt)? | <input type="checkbox"/> | <input type="checkbox"/> |
| 4. | Erzählt der/die Patient/in Witze oder macht er/sie Bemerkungen, die andere wenig lustig finden, ihm/ihr aber komisch erscheinen?                                              | <input type="checkbox"/> | <input type="checkbox"/> |
| 5. | Spielt er/sie zum Spaß kindische Streiche, wie etwa kneifen oder anderen etwas wegnehmen und damit weglafen?                                                                  | <input type="checkbox"/> | <input type="checkbox"/> |
| 6. | "Prahlt" der/die Patient/in oder behauptet er/sie, mehr Fähigkeiten oder Besitz zu haben als der Wahrheit entspricht?                                                         | <input type="checkbox"/> | <input type="checkbox"/> |
| 7. | Zeigt der/die Patient/in irgendwelche anderen Anzeichen dafür, dass er/sie sich zu gut fühlt oder zu glücklich ist?                                                           | <input type="checkbox"/> | <input type="checkbox"/> |

Wurde die Leitfrage durch die Antworten auf die Unterfragen bestätigt, bestimmen Sie bitte die Häufigkeit und Schwere der Hochstimmung/Euphorie und die Belastung durch die Hochstimmung/Euphorie.

|                                                                                               |    |                                                                                                                    |
|-----------------------------------------------------------------------------------------------|----|--------------------------------------------------------------------------------------------------------------------|
| Häufigkeit:<br>(Kreisen Sie eine Zahl ein)                                                    | 1. | Selten - weniger als einmal pro Woche                                                                              |
|                                                                                               | 2. | Manchmal - etwa einmal die Woche                                                                                   |
|                                                                                               | 3. | Häufig - mehrmals pro Woche, aber nicht jeden Tag                                                                  |
|                                                                                               | 4. | Sehr häufig - beinahe immer vorhanden                                                                              |
| Schweregrad:<br>(Kreisen Sie eine Zahl ein)                                                   | 1. | Leicht - die Hochstimmung ist für Freunde und Familie auffällig, aber nicht störend                                |
|                                                                                               | 2. | Mäßig - die Hochstimmung ist auffällig abnormal                                                                    |
|                                                                                               | 3. | Deutlich - die Hochstimmung ist sehr ausgeprägt; der/die Patient/in ist euphorisch und findet beinahe alles lustig |
| Belastung: Wie stark sind Sie durch dieses Verhalten belastet?<br>(Kreisen Sie eine Zahl ein) | 0  | Überhaupt nicht                                                                                                    |
|                                                                                               | 1. | Minimal                                                                                                            |
|                                                                                               | 2. | Leicht                                                                                                             |
|                                                                                               | 3. | Mäßig                                                                                                              |
|                                                                                               | 4. | Schwer                                                                                                             |
|                                                                                               | 5. | Sehr schwer oder extrem                                                                                            |

## 8.7 Apathie/Gleichgültigkeit

„Hat der/die Patient/in das Interesse an der Welt um sich herum verloren? Hat er/sie das Interesse daran verloren, etwas zu tun oder fehlt ihm/ihr die Motivation, etwas Neues zu beginnen? Ist es schwerer geworden, ihn/sie in ein Gespräch zu verwickeln oder zur Hausarbeit zu bewegen? Ist der/die Patient/in apathisch oder gleichgültig?“

- N/A (falls N/A, kreuzen Sie hier an und gehen Sie weiter zu der Frage auf der nächsten Seite.)**
- NEIN (falls "nein", kreuzen Sie hieran und gehen Sie weiter zu der Frage auf der nächsten Seite.)**
- JA (falls "ja", bitte gehen Sie weiter zu den Unterfragen).**

|    |                                                                                                                             | Nein                     | Ja                       |
|----|-----------------------------------------------------------------------------------------------------------------------------|--------------------------|--------------------------|
| 1. | Scheint der/die Patient/in weniger spontan und weniger aktiv als normalerweise?                                             | <input type="checkbox"/> | <input type="checkbox"/> |
| 2. | Ist es weniger wahrscheinlich, dass der/die Patient/in von sich aus ein Gespräch beginnt?                                   | <input type="checkbox"/> | <input type="checkbox"/> |
| 3. | Ist der/die Patient/in weniger herzlich oder mangelt es ihm/ihr an Gefühlen verglichen mit seinem/ihrer normalen Verhalten? | <input type="checkbox"/> | <input type="checkbox"/> |
| 4. | Trägt der/die Patient/-in weniger zur Erledigung der Hausarbeit bei?                                                        | <input type="checkbox"/> | <input type="checkbox"/> |
| 5. | Scheint der/die Patient/in weniger interessiert an Aktivitäten und Planungen anderer?                                       | <input type="checkbox"/> | <input type="checkbox"/> |
| 6. | Hat der/die Patient/in das Interesse an Freunden und Familienmitgliedern verloren?                                          | <input type="checkbox"/> | <input type="checkbox"/> |
| 7. | Zeigt der/die Patient/in weniger Begeisterung für seine/ihre üblichen Interessen?                                           | <input type="checkbox"/> | <input type="checkbox"/> |
| 8. | Zeigt der/die Patient/in irgendwelche anderen Anzeichen dafür, dass ihm/ihr nichts daran liegt, etwas Neues zu tun?         | <input type="checkbox"/> | <input type="checkbox"/> |

Wurde die Leitfrage durch die Antworten auf die Unterfragen bestätigt, bestimmen Sie bitte die Häufigkeit und Schwere der Apathie/Gleichgültigkeit und die Belastung durch die Apathie/Gleichgültigkeit.

|                                                                                                  |    |                                                                                                                                                                                                                                          |
|--------------------------------------------------------------------------------------------------|----|------------------------------------------------------------------------------------------------------------------------------------------------------------------------------------------------------------------------------------------|
| Häufigkeit:<br>(Kreisen Sie eine Zahl ein)                                                       | 1. | Selten - weniger als einmal pro Woche                                                                                                                                                                                                    |
|                                                                                                  | 2. | Manchmal - etwa einmal die Woche                                                                                                                                                                                                         |
|                                                                                                  | 3. | Häufig - mehrmals pro Woche, aber nicht jeden Tag                                                                                                                                                                                        |
|                                                                                                  | 4. | Sehr häufig - beinahe immer vorhanden                                                                                                                                                                                                    |
| Schweregrad:<br>(Kreisen Sie eine Zahl ein)                                                      | 1. | Leicht - die Apathie ist auffällig, verursacht jedoch wenig Störung in der täglichen Routine; unterscheidet sich nur leicht vom normalen Verhalten des/der Patient/in; Patient/in spricht auf Vorschläge an, an Aktivitäten teilzunehmen |
|                                                                                                  | 2. | Mäßig - die Apathie ist sehr offensichtlich; kann von der Betreuungsperson durch gut Zureden und Ermutigen überwunden werden; reagiert spontan nur auf besondere Ereignisse wie Besuche von nahen Verwandten oder Familienmitgliedern    |
|                                                                                                  | 3. | Deutlich - die Apathie ist sehr offensichtlich und spricht normalerweise nicht auf Ermutigung oder äußere Ereignisse an.                                                                                                                 |
| Belastung:<br>Wie stark sind Sie durch dieses Verhalten belastet?<br>(Kreisen Sie eine Zahl ein) | 0  | Überhaupt nicht                                                                                                                                                                                                                          |
|                                                                                                  | 1. | Minimal                                                                                                                                                                                                                                  |
|                                                                                                  | 2. | Leicht                                                                                                                                                                                                                                   |
|                                                                                                  | 3. | Mäßig                                                                                                                                                                                                                                    |
|                                                                                                  | 4. | Schwer                                                                                                                                                                                                                                   |
|                                                                                                  | 5. | Sehr schwer oder extrem                                                                                                                                                                                                                  |



## 8.8 Enthemmung

„Scheint der/die Patient/in impulsiv zu handeln ohne nachzudenken? Tut oder sagt er/sie Dinge, die man normalerweise nicht in der Öffentlichkeit tut oder sagt? Tut er/sie Dinge, die für Sie oder andere peinlich sind?“

- N/A (falls N/A, kreuzen Sie hier an und gehen Sie weiter zu der Frage auf der nächsten Seite.)**
- NEIN (falls "nein", kreuzen Sie hieran und gehen Sie weiter zu der Frage auf der nächsten Seite.)**
- JA (falls "ja", bitte gehen Sie weiter zu den Unterfragen).**

|    |                                                                                                                                             | Nein                     | Ja                       |
|----|---------------------------------------------------------------------------------------------------------------------------------------------|--------------------------|--------------------------|
| 1. | Handelt der/die Patient/in impulsiv, anscheinend ohne die Konsequenzen zu bedenken?                                                         | <input type="checkbox"/> | <input type="checkbox"/> |
| 2. | Spricht der/die Patient/in zu völlig Fremden, als ob er/sie sie kennen würde?                                                               | <input type="checkbox"/> | <input type="checkbox"/> |
| 3. | Sagt der/die Patient/in Dinge zu Menschen, die unsensibel sind oder deren Gefühle verletzen?                                                | <input type="checkbox"/> | <input type="checkbox"/> |
| 4. | Sagt der/die Patient/in ordinäre Dinge oder macht er/sie sexuelle Anspielungen, die er/sie normalerweise nicht gesagt hätte?                | <input type="checkbox"/> | <input type="checkbox"/> |
| 5. | Spricht der/die Patient/in offen über sehr persönliche oder private Dinge, die normalerweise nicht in der Öffentlichkeit diskutiert werden? | <input type="checkbox"/> | <input type="checkbox"/> |
| 6. | Nimmt sich der/die Patient/in Freiheiten heraus oder berührt oder umarmt andere auf eine Weise, die nicht zu ihm/ihr passt?                 | <input type="checkbox"/> | <input type="checkbox"/> |
| 7. | Zeigt der/die Patient/-in irgendwelche andere Anzeichen eines Verlustes an Kontrolle über seine/ihre Impulse?                               | <input type="checkbox"/> | <input type="checkbox"/> |

Wurde die Leitfrage durch die Antworten auf die Unterlagen bestätigt, bestimmen Sie bitte die Häufigkeit und Schwere der Enthemmung und die Belastung durch die Enthemmung.

|                                                                                               |    |                                                                                                                                                                      |
|-----------------------------------------------------------------------------------------------|----|----------------------------------------------------------------------------------------------------------------------------------------------------------------------|
| Häufigkeit:<br>(Kreisen Sie eine Zahl ein)                                                    | 1. | Selten - weniger als einmal pro Woche                                                                                                                                |
|                                                                                               | 2. | Manchmal - etwa einmal die Woche                                                                                                                                     |
|                                                                                               | 3. | Häufig - mehrmals pro Woche, aber nicht jeden Tag                                                                                                                    |
|                                                                                               | 4. | Sehr häufig - beinahe immer vorhanden                                                                                                                                |
| Schweregrad:<br>(Kreisen Sie eine Zahl ein)                                                   | 1. | Leicht - die Enthemmung ist auffällig, spricht aber normalerweise auf Lenkung und Führung an                                                                         |
|                                                                                               | 2. | Mäßig - die Enthemmung ist sehr offensichtlich und durch die Betreuungsperson schwer zu überwinden                                                                   |
|                                                                                               | 3. | Deutlich - die Enthemmung spricht normalerweise nicht auf irgendeine Intervention der Betreuungsperson an und ist eine Ursache für Peinlichkeit oder sozialen Stress |
| Belastung: Wie stark sind Sie durch dieses Verhalten belastet?<br>(Kreisen Sie eine Zahl ein) | 0  | Überhaupt nicht                                                                                                                                                      |
|                                                                                               | 1. | Minimal                                                                                                                                                              |
|                                                                                               | 2. | Leicht                                                                                                                                                               |
|                                                                                               | 3. | Mäßig                                                                                                                                                                |
|                                                                                               | 4. | Schwer                                                                                                                                                               |
|                                                                                               | 5. | Sehr schwer oder extrem                                                                                                                                              |

## 8.9 Reizbarkeit/Labilität

„Regt sich der/die Patient/in auf und wird er/sie leicht durcheinandergebracht? Ist er/sie sehr wechselhaft in seinen/ihren Stimmungen? Ist er/sie abnormal ungeduldig? Ich meine hier nicht die Frustration über Gedächtnisverlust oder die Unfähigkeit, die üblichen Aufgaben zu erfüllen. Ich möchte wissen, ob der/die Patient/-in abnormale Reizbarkeit, Ungeduld oder schnelle emotionale Veränderung zeigt, die anders sind als sein/ihr normales Verhalten.“

- N/A (falls N/A, kreuzen Sie hier an und gehen Sie weiter zu der Frage auf der nächsten Seite.)**
- NEIN (falls "nein", kreuzen Sie hieran und gehen Sie weiter zu der Frage auf der nächsten Seite.)**
- JA (falls "ja", bitte gehen Sie weiter zu den Unterfragen).**

|    |                                                                                                                                                  | Nein                     | Ja                       |
|----|--------------------------------------------------------------------------------------------------------------------------------------------------|--------------------------|--------------------------|
| 1. | Hat der/die Patient/in schlechte Laune, geht er/sie leicht wegen Kleinigkeiten "an die Decke"?                                                   | <input type="checkbox"/> | <input type="checkbox"/> |
| 2. | Wechselt der/die Patient/-in schnell von einer Stimmung in eine andere, ist er/sie in der einen Minute gut aufgelegt und in der nächsten wütend? | <input type="checkbox"/> | <input type="checkbox"/> |
| 3. | Hat der/die Patient/in plötzliche Wutanfälle?                                                                                                    | <input type="checkbox"/> | <input type="checkbox"/> |
| 4. | Ist der/die Patient/in ungeduldig, hat er/sie Mühe, mit Verzögerungen fertig zu werden oder auf geplante Aktivitäten zu warten?                  | <input type="checkbox"/> | <input type="checkbox"/> |
| 5. | Ist der/die Patient/in griesgrämig und reizbar?                                                                                                  | <input type="checkbox"/> | <input type="checkbox"/> |
| 6. | Ist der/die Patient/in streitsüchtig und ist es schwer, mit ihm/ihr auszukommen?                                                                 | <input type="checkbox"/> | <input type="checkbox"/> |
| 7. | Zeigt der/die Patient/in irgendwelche anderen Anzeichen von Reizbarkeit?                                                                         | <input type="checkbox"/> | <input type="checkbox"/> |

Wurde die Leitfrage durch die Antworten auf die Unterfragen bestätigt, bestimmen Sie bitte die Häufigkeit und Schwere der Reizbarkeit/Labilität und die Belastung durch die Reizbarkeit/Labilität.

|                                                                                               |    |                                                                                                                                                                                              |
|-----------------------------------------------------------------------------------------------|----|----------------------------------------------------------------------------------------------------------------------------------------------------------------------------------------------|
| Häufigkeit:<br>(Kreisen Sie eine Zahl ein)                                                    | 1. | Selten - weniger als einmal pro Woche                                                                                                                                                        |
|                                                                                               | 2. | Manchmal - etwa einmal die Woche                                                                                                                                                             |
|                                                                                               | 3. | Häufig - mehrmals pro Woche, aber nicht jeden Tag                                                                                                                                            |
|                                                                                               | 4. | Sehr häufig - beinahe immer vorhanden                                                                                                                                                        |
| Schweregrad:<br>(Kreisen Sie eine Zahl ein)                                                   | 1. | Leicht - Reizbarkeit oder Labilität ist auffällig, spricht aber normalerweise auf Lenkung und Beruhigung an                                                                                  |
|                                                                                               | 2. | Mäßig - Reizbarkeit und Labilität sind sehr offensichtlich und durch die Betreuungsperson schwer zu überwinden                                                                               |
|                                                                                               | 3. | Deutlich - Reizbarkeit und Labilität sind sehr offensichtlich: sie sprechen normalerweise nicht auf irgendeine Intervention der Betreuungsperson an und sind eine Hauptursache für Belastung |
| Belastung: Wie stark sind Sie durch dieses Verhalten belastet?<br>(Kreisen Sie eine Zahl ein) | 0  | Überhaupt nicht                                                                                                                                                                              |
|                                                                                               | 1. | Minimal                                                                                                                                                                                      |
|                                                                                               | 2. | Leicht                                                                                                                                                                                       |
|                                                                                               | 3. | Mäßig                                                                                                                                                                                        |
|                                                                                               | 4. | Schwer                                                                                                                                                                                       |
|                                                                                               | 5. | Sehr schwer oder extrem                                                                                                                                                                      |

## 8.10 Abweichendes motorisches Verhalten

„Geht der/die Patient/-in auf und ab, macht er/sie Dinge wieder und wieder wie etwa Schränke und Schubladen zu öffnen oder wiederholt an Dingen zu zupfen oder Schnur oder Fäden aufzuwickeln?“

- N/A (falls N/A, kreuzen Sie hier an und gehen Sie weiter zu der Frage auf der nächsten Seite.)**  
 **NEIN (falls "nein", kreuzen Sie hieran und gehen Sie weiter zu der Frage auf der nächsten Seite.)**  
 **JA (falls "ja", bitte gehen Sie weiter zu den Unterfragen).**

|    |                                                                                                                                                              | Nein                     | Ja                       |
|----|--------------------------------------------------------------------------------------------------------------------------------------------------------------|--------------------------|--------------------------|
| 1. | Geht der/die Patient/in ohne ersichtliches Ziel im Haus auf und ab?                                                                                          | <input type="checkbox"/> | <input type="checkbox"/> |
| 2. | Stöbert der/die Patient/in herum, öffnet Schubladen oder Schränke und räumt sie aus?                                                                         | <input type="checkbox"/> | <input type="checkbox"/> |
| 3. | Zieht der/die Patient/in wiederholt Kleidung an und aus?                                                                                                     | <input type="checkbox"/> | <input type="checkbox"/> |
| 4. | Hat der/die Patient/in sich wiederholende Aktivitäten oder "Gewohnheiten", die er/sie wieder und wieder ausführt?                                            | <input type="checkbox"/> | <input type="checkbox"/> |
| 5. | Beschäftigt sich der/die Patient/in mit sich wiederholenden Aktivitäten wie an Knöpfen zu spielen, zu zupfen, Schnur aufzuwickeln etc.?                      | <input type="checkbox"/> | <input type="checkbox"/> |
| 6. | Zappelt der/die Patient/in übermäßig, scheint er/sie unfähig zu sein, stillzusitzen, wippt mit seinen/ihren Füßen oder klopft viel mit seinen/ihren Fingern? | <input type="checkbox"/> | <input type="checkbox"/> |
| 7. | Wiederholt der/die Patient/in irgendwelche anderen Aktivitäten wieder und wieder?                                                                            | <input type="checkbox"/> | <input type="checkbox"/> |

Wurde die Leitfrage durch die Antworten auf die Unterfragen bestätigt, bestimmen Sie bitte die Häufigkeit und Schwere des abweichenden motorischen Verhaltens und die Belastung durch das abweichende motorische Verhalten.

|                                                                                               |    |                                                                                                                                                                                                   |
|-----------------------------------------------------------------------------------------------|----|---------------------------------------------------------------------------------------------------------------------------------------------------------------------------------------------------|
| Häufigkeit:<br>(Kreisen Sie eine Zahl ein)                                                    | 1. | Selten - weniger als einmal pro Woche                                                                                                                                                             |
|                                                                                               | 2. | Manchmal - etwa einmal die Woche                                                                                                                                                                  |
|                                                                                               | 3. | Häufig - mehrmals pro Woche, aber nicht jeden Tag                                                                                                                                                 |
|                                                                                               | 4. | Sehr häufig - beinahe immer vorhanden                                                                                                                                                             |
| Schweregrad:<br>(Kreisen Sie eine Zahl ein)                                                   | 1. | Leicht - abweichendes motorisches Verhalten ist auffällig, verursacht jedoch wenig Störung in der täglichen Routine                                                                               |
|                                                                                               | 2. | Mäßig - abweichendes motorisches Verhalten ist sehr offensichtlich;<br>kann von der Betreuungsperson korrigiert werden                                                                            |
|                                                                                               | 3. | Deutlich - abweichendes motorisches Verhalten ist sehr offensichtlich, es spricht normalerweise nicht auf irgendeine Intervention der Betreuungsperson an und ist eine Hauptursache für Belastung |
| Belastung: Wie stark sind Sie durch dieses Verhalten belastet?<br>(Kreisen Sie eine Zahl ein) | 0  | Überhaupt nicht                                                                                                                                                                                   |
|                                                                                               | 1. | Minimal                                                                                                                                                                                           |
|                                                                                               | 2. | Leicht                                                                                                                                                                                            |
|                                                                                               | 3. | Mäßig                                                                                                                                                                                             |
|                                                                                               | 4. | Schwer                                                                                                                                                                                            |
|                                                                                               | 5. | Sehr schwer oder extrem                                                                                                                                                                           |

## 8.11 Schlaf

„Hat der Patient Schlafschwierigkeiten (nicht zutreffend, wenn der Patient nur ein- oder zweimal in der Nacht aufsteht, um zur Toilette zu gehen und dann gleich wieder einschläft). Steht er nachts auf und geht umher, zieht sich an oder geht in andere Zimmer?“

- N/A (falls N/A, kreuzen Sie hier an und gehen Sie weiter zu der Frage auf der nächsten Seite.)**  
 **NEIN (falls "nein", kreuzen Sie hieran und gehen Sie weiter zu der Frage auf der nächsten Seite.)**  
 **JA (falls "ja", bitte gehen Sie weiter zu den Unterfragen).**

|    |                                                                                                                                                                            | Nein                     | Ja                       |
|----|----------------------------------------------------------------------------------------------------------------------------------------------------------------------------|--------------------------|--------------------------|
| 1. | Schläft der Patient schlecht ein?                                                                                                                                          | <input type="checkbox"/> | <input type="checkbox"/> |
| 2. | Steht der Patient nachts auf (nicht zutreffend, wenn der Patient nur ein- oder zweimal in der Nacht aufsteht, um zur Toilette zu gehen und dann gleich wieder einschläft). | <input type="checkbox"/> | <input type="checkbox"/> |
| 3. | Steht der Patient auf und läuft umher oder macht sonst etwas Unpassendes in der Nacht?                                                                                     | <input type="checkbox"/> | <input type="checkbox"/> |
| 4. | Weckt der Patient Sie während der Nacht auf?                                                                                                                               | <input type="checkbox"/> | <input type="checkbox"/> |
| 5. | Wird der Patient nachts wach, zieht er sich an und versucht auszugehen, weil er meint, es sei Morgen und Zeit, den Tag anzufangen?                                         | <input type="checkbox"/> | <input type="checkbox"/> |
| 6. | Erwacht der Patient morgens zu früh (früher als üblich)?                                                                                                                   | <input type="checkbox"/> | <input type="checkbox"/> |
| 7. | Schläft der Patient übermäßig viel am Tag?                                                                                                                                 | <input type="checkbox"/> | <input type="checkbox"/> |
| 8. | Verhält sich der Patient nachts sonst irgendwie auffällig?                                                                                                                 | <input type="checkbox"/> | <input type="checkbox"/> |

Wurde die Leitfrage durch die Antworten auf die Unterfragen bestätigt, bestimmen Sie bitte die Häufigkeit und Schwere des nächtlichen Verhaltens und die Belastung durch das nächtliche Verhalten.

|                                                                                               |    |                                                                                                                                                                                                |
|-----------------------------------------------------------------------------------------------|----|------------------------------------------------------------------------------------------------------------------------------------------------------------------------------------------------|
| Häufigkeit:<br>(Kreisen Sie eine Zahl ein)                                                    | 1. | Selten - weniger als einmal pro Woche                                                                                                                                                          |
|                                                                                               | 2. | Manchmal - etwa einmal die Woche                                                                                                                                                               |
|                                                                                               | 3. | Häufig - mehrmals pro Woche, aber nicht jeden Tag                                                                                                                                              |
|                                                                                               | 4. | Sehr häufig - beinahe immer vorhanden                                                                                                                                                          |
| Schweregrad:<br>(Kreisen Sie eine Zahl ein)                                                   | 1. | Leicht – nächtliche Ereignisse kommen vor, sind aber nicht besonders störend                                                                                                                   |
|                                                                                               | 2. | Mäßig – nächtliche Ereignisse kommen vor und stören den Schlaf des/der Patienten/in und der Pflegeperson; ein Einzelverhalten kann mehr als einmal vorkommen.                                  |
|                                                                                               | 3. | Deutlich – nächtliche Ereignisse kommen vor; mehrere Arten von Verhalten können vorkommen; der/die Patient/in ist sehr unruhig in der Nacht und der Schlaf der Pflegeperson wird sehr gestört. |
| Belastung: Wie stark sind Sie durch dieses Verhalten belastet?<br>(Kreisen Sie eine Zahl ein) | 0  | Überhaupt nicht                                                                                                                                                                                |
|                                                                                               | 1. | Minimal                                                                                                                                                                                        |
|                                                                                               | 2. | Leicht                                                                                                                                                                                         |
|                                                                                               | 3. | Mäßig                                                                                                                                                                                          |
|                                                                                               | 4. | Schwer                                                                                                                                                                                         |
|                                                                                               | 5. | Sehr schwer oder extrem                                                                                                                                                                        |

## 8.12 Appetit und Essstörungen

„Ist eine Veränderung im Appetit, Gewicht oder in den Essgewohnheiten beim Patienten zu verzeichnen (nicht zutreffend, falls der Patient nicht alleine essen kann und gefüttert werden muss.) Haben sich seine Vorlieben verändert?“

- N/A (falls N/A, kreuzen Sie hier an und gehen Sie weiter zu der Frage auf der nächsten Seite.)**
- NEIN (falls "nein", kreuzen Sie hieran und gehen Sie weiter zu der Frage auf der nächsten Seite.)**
- JA (falls "ja", bitte gehen Sie weiter zu den Unterfragen).**

|    |                                                                                                                                                                  | Nein                     | Ja                       |
|----|------------------------------------------------------------------------------------------------------------------------------------------------------------------|--------------------------|--------------------------|
| 1. | Leidet der Patient unter Appetitverlust?                                                                                                                         | <input type="checkbox"/> | <input type="checkbox"/> |
| 2. | Hat der Appetit zugenommen?                                                                                                                                      | <input type="checkbox"/> | <input type="checkbox"/> |
| 3. | Hat der Patient Gewicht verloren?                                                                                                                                | <input type="checkbox"/> | <input type="checkbox"/> |
| 4. | Hat der Patient Gewicht zugenommen?                                                                                                                              | <input type="checkbox"/> | <input type="checkbox"/> |
| 5. | Hat sich das Essverhalten verändert (z.B. nimmt der Patient zu viel auf einmal in den Mund)?                                                                     | <input type="checkbox"/> | <input type="checkbox"/> |
| 6. | Stellen Sie eine Veränderung der bevorzugten Nahrungsmittel fest, z.B. zu viele Süßigkeiten oder andere spezielle Sachen?                                        | <input type="checkbox"/> | <input type="checkbox"/> |
| 7. | Hat der Patient ein „eigenartiges“ Essverhalten entwickelt, wie z.B. täglich genau die gleichen Nahrungsmittel essen oder in einer bestimmten Reihenfolge essen? | <input type="checkbox"/> | <input type="checkbox"/> |
| 8. | Sind andere Veränderungen aufgetreten, die oben nicht erwähnt sind?                                                                                              | <input type="checkbox"/> | <input type="checkbox"/> |

Wurde die Leitfrage durch die Antworten auf die Unterfragen bestätigt, bestimmen Sie bitte die Häufigkeit und Schwere der Appetit- und Essstörungen und die Belastung durch die Appetit- und Essstörungen.

|                                                                                               |    |                                                                                                                                                                                                                 |
|-----------------------------------------------------------------------------------------------|----|-----------------------------------------------------------------------------------------------------------------------------------------------------------------------------------------------------------------|
| Häufigkeit (Frequency):<br>(Kreisen Sie eine Zahl ein)                                        | 1. | Selten - weniger als einmal pro Woche                                                                                                                                                                           |
|                                                                                               | 2. | Manchmal - etwa einmal die Woche                                                                                                                                                                                |
|                                                                                               | 3. | Häufig - mehrmals pro Woche, aber nicht jeden Tag                                                                                                                                                               |
|                                                                                               | 4. | Sehr häufig - beinahe immer vorhanden                                                                                                                                                                           |
| Schweregrad (Severity):<br>(Kreisen Sie eine Zahl ein)                                        | 1. | Leicht – Veränderungen im Appetit oder beim Essen sind vorhanden, die aber nicht zu einer Gewichtszunahme geführt haben.                                                                                        |
|                                                                                               | 2. | Mäßig – Veränderungen im Appetit oder beim Essen sind vorhanden und haben zu einer Gewichtszunahme geführt                                                                                                      |
|                                                                                               | 3. | Deutlich – Deutliche Veränderungen im Appetit oder beim Essen sind vorhanden und haben zu einer Gewichtszunahme geführt. Diese sind für den/die Patienten/in peinlich oder beeinträchtigen sie/ihn anderweitig. |
| Belastung: Wie stark sind Sie durch dieses Verhalten belastet?<br>(Kreisen Sie eine Zahl ein) | 0  | Überhaupt nicht                                                                                                                                                                                                 |
|                                                                                               | 1. | Minimal                                                                                                                                                                                                         |
|                                                                                               | 2. | Leicht                                                                                                                                                                                                          |
|                                                                                               | 3. | Mäßig                                                                                                                                                                                                           |
|                                                                                               | 4. | Schwer                                                                                                                                                                                                          |
|                                                                                               | 5. | Sehr schwer oder extrem                                                                                                                                                                                         |

## Häusliche Pflege-Skala

Zu den folgenden Aussagen bitten wir Sie um Angaben, die in Zusammenhang mit Ihrer *gegenwärtigen* Situation stehen. In den Aussagen wird nicht zwischen Betreuung und Pflege unterschieden. Mit dem Wort „Pflege“ ist beides gemeint.

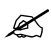

Kreuzen Sie zu jeder Aussage die Spalte an (rechts daneben), die für Sie am ehesten zutrifft. Beantworten Sie bitte jede Frage!

|    |                                                                                                                    | stimmt<br>genau          | stimmt<br>überwiegend    | stimmt<br>ein wenig      | stimmt<br>nicht          |
|----|--------------------------------------------------------------------------------------------------------------------|--------------------------|--------------------------|--------------------------|--------------------------|
| 1  | Ich fühle mich morgens ausgeschlafen.                                                                              | <input type="checkbox"/> | <input type="checkbox"/> | <input type="checkbox"/> | <input type="checkbox"/> |
| 2  | Durch die Pflege hat die Zufriedenheit mit meinem Leben gelitten.                                                  | <input type="checkbox"/> | <input type="checkbox"/> | <input type="checkbox"/> | <input type="checkbox"/> |
| 3  | Ich fühle mich oft körperlich erschöpft.                                                                           | <input type="checkbox"/> | <input type="checkbox"/> | <input type="checkbox"/> | <input type="checkbox"/> |
| 4  | Ich habe hin und wieder den Wunsch, aus meiner Situation „auszubrechen“.                                           | <input type="checkbox"/> | <input type="checkbox"/> | <input type="checkbox"/> | <input type="checkbox"/> |
| 5  | Ich vermisste es, über die Pflege mit anderen sprechen zu können.                                                  | <input type="checkbox"/> | <input type="checkbox"/> | <input type="checkbox"/> | <input type="checkbox"/> |
| 6  | Mir bleibt genügend Zeit für meine eigenen Interessen und Bedürfnisse.                                             | <input type="checkbox"/> | <input type="checkbox"/> | <input type="checkbox"/> | <input type="checkbox"/> |
| 7  | Ich fühle mich manchmal von dem/der Pflegebedürftigen ausgenutzt.                                                  | <input type="checkbox"/> | <input type="checkbox"/> | <input type="checkbox"/> | <input type="checkbox"/> |
| 8  | Ich kann außerhalb der Pflegesituation abschalten.                                                                 | <input type="checkbox"/> | <input type="checkbox"/> | <input type="checkbox"/> | <input type="checkbox"/> |
| 9  | Es fällt mir leicht, dem/der Pflegebedürftigen bei den notwendigen Dingen zu helfen (z.B. beim Waschen und essen). | <input type="checkbox"/> | <input type="checkbox"/> | <input type="checkbox"/> | <input type="checkbox"/> |
| 10 | Ich empfinde mich manchmal nicht mehr richtig als „ich selbst“.                                                    | <input type="checkbox"/> | <input type="checkbox"/> | <input type="checkbox"/> | <input type="checkbox"/> |
| 11 | Die von mir geleistete Pflege wird von anderen entsprechend anerkannt.                                             | <input type="checkbox"/> | <input type="checkbox"/> | <input type="checkbox"/> | <input type="checkbox"/> |
| 12 | Mein Lebensstandard hat sich durch die Pflege verringert.                                                          | <input type="checkbox"/> | <input type="checkbox"/> | <input type="checkbox"/> | <input type="checkbox"/> |
| 13 | Ich habe das Gefühl, dass mir die Pflege aufgedrängt wurde.                                                        | <input type="checkbox"/> | <input type="checkbox"/> | <input type="checkbox"/> | <input type="checkbox"/> |
| 14 | Die Wünsche des/der Pflegebedürftigen sind meiner Meinung nach angemessen.                                         | <input type="checkbox"/> | <input type="checkbox"/> | <input type="checkbox"/> | <input type="checkbox"/> |

|    |                                                                                                                                 | stimmt<br>genau          | stimmt<br>überwiegend    | stimmt<br>ein wenig      | stimmt<br>nicht          |
|----|---------------------------------------------------------------------------------------------------------------------------------|--------------------------|--------------------------|--------------------------|--------------------------|
| 15 | Ich habe das Gefühl, die Pflege „im Griff“ zu haben.                                                                            | <input type="checkbox"/> | <input type="checkbox"/> | <input type="checkbox"/> | <input type="checkbox"/> |
| 16 | Durch die Pflege wird meine Gesundheit angegriffen.                                                                             | <input type="checkbox"/> | <input type="checkbox"/> | <input type="checkbox"/> | <input type="checkbox"/> |
| 17 | Ich kann mich noch von Herzen freuen.                                                                                           | <input type="checkbox"/> | <input type="checkbox"/> | <input type="checkbox"/> | <input type="checkbox"/> |
| 18 | Wegen der Pflege musste ich Pläne für meine Zukunft aufgeben.                                                                   | <input type="checkbox"/> | <input type="checkbox"/> | <input type="checkbox"/> | <input type="checkbox"/> |
| 19 | Es macht mir nichts aus, wenn Außenstehende die Situation des/der Pflegebedürftigen mitbekommen.                                | <input type="checkbox"/> | <input type="checkbox"/> | <input type="checkbox"/> | <input type="checkbox"/> |
| 20 | Die Pflege kostet viel von meiner eigenen Kraft.                                                                                | <input type="checkbox"/> | <input type="checkbox"/> | <input type="checkbox"/> | <input type="checkbox"/> |
| 21 | Ich fühle mich „hin und her gerissen“ zwischen den Anforderungen meiner Umgebung (z.B. Familie) und den Anforderungen durch die | <input type="checkbox"/> | <input type="checkbox"/> | <input type="checkbox"/> | <input type="checkbox"/> |
| 22 | Ich empfinde den Kontakt zu dem/der Pflegebedürftigen als gut.                                                                  | <input type="checkbox"/> | <input type="checkbox"/> | <input type="checkbox"/> | <input type="checkbox"/> |
| 23 | Wegen der Pflege gibt es Probleme mit anderen Familienangehörigen.                                                              | <input type="checkbox"/> | <input type="checkbox"/> | <input type="checkbox"/> | <input type="checkbox"/> |
| 24 | Ich habe das Gefühl, ich sollte mal wieder ausspannen.                                                                          | <input type="checkbox"/> | <input type="checkbox"/> | <input type="checkbox"/> | <input type="checkbox"/> |
| 25 | Ich Sorge mich aufgrund der Pflege um meine Zukunft.                                                                            | <input type="checkbox"/> | <input type="checkbox"/> | <input type="checkbox"/> | <input type="checkbox"/> |
| 26 | Wegen der pflege leidet meine Beziehung zu Familienangehörigen, Verwandten, Freunden und Bekannten.                             | <input type="checkbox"/> | <input type="checkbox"/> | <input type="checkbox"/> | <input type="checkbox"/> |
| 27 | Das Schicksal des/der Pflegebedürftigen macht mich traurig.                                                                     | <input type="checkbox"/> | <input type="checkbox"/> | <input type="checkbox"/> | <input type="checkbox"/> |
| 28 | Neben der Pflege kann ich meine sonstigen Aufgaben des täglichen Lebens meinen Vorstellungen entsprechend erledigen.            | <input type="checkbox"/> | <input type="checkbox"/> | <input type="checkbox"/> | <input type="checkbox"/> |

## Schlafqualitäts-Fragebogen (PSQI)

Die folgenden Fragen beziehen sich auf Ihre üblichen Schlafgewohnheiten und zwar *nur während der letzten vier Wochen*. Ihre Antworten sollten möglichst genau sein und sich auf die Mehrzahl der Tage und Nächte während der letzten vier Wochen beziehen. Beantworten Sie bitte alle Fragen.

1. **Wann sind Sie während der letzten vier Wochen gewöhnlich abends zu Bett gegangen?** übliche Uhrzeit:
2. **Wie lange hat es während der letzten vier Wochen gewöhnlich gedauert, bis Sie nachts eingeschlafen sind?** in Minuten:
3. **Wann sind Sie während der letzten vier Wochen gewöhnlich morgens aufgestanden?** übliche Uhrzeit:
4. **Wie viele Stunden haben Sie während der letzten vier Wochen pro Nacht tatsächlich geschlafen?** (Das muss nicht mit der Anzahl der Stunden, die Sie im Bett verbracht haben, übereinstimmen.) Effektive Schlafzeit (Stunden) pro Nacht:

**5. Kreuzen Sie bitte für jede der folgenden Fragen die für Sie zutreffende Antwort an. Beantworten Sie bitte alle Fragen.**

- a) ... weil Sie nicht innerhalb von 30 Minuten einschlafen konnten?
  - Während der letzten vier Wochen gar nicht
  - Weniger als einmal pro Woche
  - Einmal oder zweimal pro Woche
  - Dreimal oder häufiger pro Woche
- b) ... weil Sie mitten in der Nacht oder früh morgens aufgewacht sind?
  - Während der letzten vier Wochen gar nicht
  - Weniger als einmal pro Woche
  - Einmal oder zweimal pro Woche
  - Dreimal oder häufiger pro Woche
- c) ... weil Sie aufstehen mussten, um zur Toilette zu gehen?
  - Während der letzten vier Wochen gar nicht
  - Weniger als einmal pro Woche
  - Einmal oder zweimal pro Woche
  - Dreimal oder häufiger pro Woche
- d) ... weil Sie Beschwerden beim Atmen hatten?
  - Während der letzten vier Wochen gar nicht
  - Weniger als einmal pro Woche
  - Einmal oder zweimal pro Woche
  - Dreimal oder häufiger pro Woche
- e) ... weil Sie husten mussten oder laut geschnarcht haben?
  - Während der letzten vier Wochen gar nicht
  - Weniger als einmal pro Woche
  - Einmal oder zweimal pro Woche
  - Dreimal oder häufiger pro Woche
- f) ... weil Ihnen zu kalt war?
  - Während der letzten vier Wochen gar nicht
  - Weniger als einmal pro Woche
  - Einmal oder zweimal pro Woche
  - Dreimal oder häufiger pro Woche



- g) ... weil Ihnen zu warm war?
- Während der letzten vier Wochen gar nicht
  - Weniger als einmal pro Woche
  - Einmal oder zweimal pro Woche
  - Dreimal oder häufiger pro Woche
- h) ... weil Sie schlecht geträumt hatten?
- Während der letzten vier Wochen gar nicht
  - Weniger als einmal pro Woche
  - Einmal oder zweimal pro Woche
  - Dreimal oder häufiger pro Woche
- i) ... weil Sie Schmerzen hatten?
- Während der letzten vier Wochen gar nicht
  - Weniger als einmal pro Woche
  - Einmal oder zweimal pro Woche
  - Dreimal oder häufiger pro Woche
- j) ... aus anderen Gründen?

Bitte beschreiben:

Und wie oft während des letzten Monats konnten Sie aus diesem Grund schlecht schlafen?

- Während der letzten vier Wochen gar nicht
  - Weniger als einmal pro Woche
  - Einmal oder zweimal pro Woche
  - Dreimal oder häufiger pro Woche
6. **Wie würden Sie insgesamt die Qualität Ihres Schlafes während der letzten vier Wochen beurteilen?**
- Sehr gut
  - Ziemlich gut
  - Ziemlich schlecht
  - Sehr schlecht
7. **Wie oft haben Sie während der letzten vier Wochen Schlafmittel eingenommen (vom Arzt verschriebene oder frei verkäufliche)?**
- Während der letzten vier Wochen gar nicht
  - Weniger als einmal pro Woche
  - Einmal oder zweimal pro Woche
  - Dreimal oder häufiger pro Woche
8. **Wie oft hatten Sie während der letzten vier Wochen Schwierigkeiten wachzubleiben, etwa beim Autofahren, beim Essen oder bei gesellschaftlichen Anlässen?**
- Während der letzten vier Wochen gar nicht
  - Weniger als einmal pro Woche
  - Einmal oder zweimal pro Woche
  - Dreimal oder häufiger pro Woche
9. **Hatten Sie während der letzten vier Wochen Probleme, mit genügend Schwung die üblichen Alltagsaufgaben zu erledigen?**
- Keine Probleme
  - Kaum Probleme
  - Etwas Probleme
  - Große Probleme
10. **Schlafen Sie allein in Ihrem Zimmer?**
- Ja
  - Ja, aber ein Partner/Mitbewohner schläft in einem anderen Zimmer
  - Nein, der Partner schläft im selben Zimmer, aber nicht im selben Bett
  - Nein, der Partner schläft im selben Bett

## German Self-Administered Comorbidity Questionnaire SCQ-D

Die folgende Liste enthält verbreitete Gesundheitsprobleme. Bitte geben Sie in der **Spalte 1** an, ob Sie **momentan das jeweils aufgeführte Problem** haben. Haben Sie das aufgeführte Problem nicht, antworten Sie bitte mit „Nein“ und gehen zum nächsten Gesundheitsproblem.

Haben Sie das **Problem momentan**, geben Sie bitte in der **Spalte 2** an, ob Sie deswegen Medikamente nehmen bzw. in Behandlung sind. Geben Sie weiterhin in der **Spalte 3** an, ob das **Problem** Sie bei Ihren **täglichen Aktivitäten beeinträchtigt**.

| Problem                                              | Spalte 1                 |                          |   | Spalte 2                                                 |                          | Spalte 3                                                        |                          |
|------------------------------------------------------|--------------------------|--------------------------|---|----------------------------------------------------------|--------------------------|-----------------------------------------------------------------|--------------------------|
|                                                      | Haben Sie das Problem?   |                          |   | Sind Sie deswegen in Behandlung bzw. nehmen Medikamente? |                          | Beeinträchtigt Sie das Problem bei Ihren täglichen Aktivitäten? |                          |
|                                                      | Nein                     | Ja                       |   | Nein                                                     | Ja                       | Nein                                                            | Ja                       |
| Herzprobleme                                         | <input type="checkbox"/> | <input type="checkbox"/> | → | <input type="checkbox"/>                                 | <input type="checkbox"/> | <input type="checkbox"/>                                        | <input type="checkbox"/> |
| Bluthochdruck                                        | <input type="checkbox"/> | <input type="checkbox"/> | → | <input type="checkbox"/>                                 | <input type="checkbox"/> | <input type="checkbox"/>                                        | <input type="checkbox"/> |
| Lungenprobleme                                       | <input type="checkbox"/> | <input type="checkbox"/> | → | <input type="checkbox"/>                                 | <input type="checkbox"/> | <input type="checkbox"/>                                        | <input type="checkbox"/> |
| Diabetes/Blutzucker                                  | <input type="checkbox"/> | <input type="checkbox"/> | → | <input type="checkbox"/>                                 | <input type="checkbox"/> | <input type="checkbox"/>                                        | <input type="checkbox"/> |
| Magen-Darm-Probleme                                  | <input type="checkbox"/> | <input type="checkbox"/> | → | <input type="checkbox"/>                                 | <input type="checkbox"/> | <input type="checkbox"/>                                        | <input type="checkbox"/> |
| Nierenprobleme                                       | <input type="checkbox"/> | <input type="checkbox"/> | → | <input type="checkbox"/>                                 | <input type="checkbox"/> | <input type="checkbox"/>                                        | <input type="checkbox"/> |
| Leberprobleme                                        | <input type="checkbox"/> | <input type="checkbox"/> | → | <input type="checkbox"/>                                 | <input type="checkbox"/> | <input type="checkbox"/>                                        | <input type="checkbox"/> |
| Anämie oder andere Blutprobleme                      | <input type="checkbox"/> | <input type="checkbox"/> | → | <input type="checkbox"/>                                 | <input type="checkbox"/> | <input type="checkbox"/>                                        | <input type="checkbox"/> |
| Krebs                                                | <input type="checkbox"/> | <input type="checkbox"/> | → | <input type="checkbox"/>                                 | <input type="checkbox"/> | <input type="checkbox"/>                                        | <input type="checkbox"/> |
| Depression                                           | <input type="checkbox"/> | <input type="checkbox"/> | → | <input type="checkbox"/>                                 | <input type="checkbox"/> | <input type="checkbox"/>                                        | <input type="checkbox"/> |
| Arthrose                                             | <input type="checkbox"/> | <input type="checkbox"/> | → | <input type="checkbox"/>                                 | <input type="checkbox"/> | <input type="checkbox"/>                                        | <input type="checkbox"/> |
| Rückenschmerzen                                      | <input type="checkbox"/> | <input type="checkbox"/> | → | <input type="checkbox"/>                                 | <input type="checkbox"/> | <input type="checkbox"/>                                        | <input type="checkbox"/> |
| Rheuma                                               | <input type="checkbox"/> | <input type="checkbox"/> | → | <input type="checkbox"/>                                 | <input type="checkbox"/> | <input type="checkbox"/>                                        | <input type="checkbox"/> |
| <b>Andere Gesundheitsprobleme (bitte eintragen):</b> |                          |                          |   |                                                          |                          |                                                                 |                          |
| 1. _____                                             | <input type="checkbox"/> | <input type="checkbox"/> | → | <input type="checkbox"/>                                 | <input type="checkbox"/> | <input type="checkbox"/>                                        | <input type="checkbox"/> |
| 2. _____                                             | <input type="checkbox"/> | <input type="checkbox"/> | → | <input type="checkbox"/>                                 | <input type="checkbox"/> | <input type="checkbox"/>                                        | <input type="checkbox"/> |
| 3. _____                                             | <input type="checkbox"/> | <input type="checkbox"/> | → | <input type="checkbox"/>                                 | <input type="checkbox"/> | <input type="checkbox"/>                                        | <input type="checkbox"/> |

**Herzlichen Dank für Ihre Mühe, Sie haben  
es geschafft!**

Bitte überprüfen Sie nochmal ob Sie alle  
Fragen beantwortet haben!

Vielen Dank!
